# Supplementary material for: IPr*Thia – wingtip-flexible, sterically hindered, modular, N,C/S,C-chelating thiazole-donor N-heterocyclic carbene ligands
Source: Royal Society of Chemistry journal article supplement (doi:10.1039/d4dt01468e), 2024-01-01
Supplement: d4dt01468e1.pdf [file d4dt01468e1.pdf]

## Supporting Information

# **IPr\*Thia – Wingtip-Flexible, Sterically-Hindered, Modular, N,C/S,C-Chelating Thiazole-Donor N-Heterocyclic Carbene Ligands**

Pamela Podchorodecka,<sup>a</sup> Błażej Dziuk,<sup>b</sup> Robert Junga,<sup>c</sup> Roman Szostak,<sup>d</sup> Michal Szostak\*<sup>,e</sup>  
and Elwira Bisz\*<sup>,a</sup>

<sup>a</sup>*Department of Chemistry, Opole University, 48 Oleska Street, Opole 45-052, Poland*

<sup>b</sup>*Department of Chemistry, Wrocław University of Science and Technology, Norwida 4/6,  
Wrocław 50-373, Poland*

<sup>c</sup>*Department of Thermal Engineering and Industrial Facilities, Opole University of  
Technology, 5 Mikołajczyka Street, Opole 45-271, Poland*

<sup>d</sup>*Department of Chemistry, Wrocław University, F. Joliot-Curie 14, Wrocław 50-383, Poland*

<sup>e</sup>*Department of Chemistry, Rutgers University, 73 Warren Street, Newark, NJ 07102, USA*

[ebisz@uni.opole.pl](mailto:ebisz@uni.opole.pl); [michal.szostak@rutgers.edu](mailto:michal.szostak@rutgers.edu)

|                                                                        |     |
|------------------------------------------------------------------------|-----|
| <b>Table of Contents</b>                                               | S1  |
| Crystallographic Studies                                               | S2  |
| Computational Methods                                                  | S30 |
| <sup>1</sup> H, <sup>13</sup> C NMR and <sup>77</sup> Se Spectra       | S31 |
| Cartesian Coordinates with Zero-Point Energies and Thermal Corrections | S53 |

## Crystallographic Analysis

Single crystals of Ag and Pd complexes (4a, 4b and 5a) were collected on a Kuma KM4 diffractometer equipped with Eos CCD detector (graphite monochromatic, MoK $\alpha$  radiation,  $\lambda = 0.71073 \text{ \AA}$ ) at room temperature. The single crystals of the complexes 5b and 6b were collected on a Rigaku Oxford Diffraction XtaLAB SynergyR DW diffractometer equipped with a HyPix ARC 150° Hybrid Photon Counting (HPC) detector using CuK $\alpha$  ( $\lambda = 1.54184 \text{ \AA}$ ) at 100 K. The corrections to the Lorentz and polarization factors were applied to the reflection intensities [1]. Data were processed using the CrysAlisPro software. The structures were solved by direct methods using SHELXS and refined by full-matrix least-squares methods based F<sup>2</sup> using SHELXL [2, 3]. The hydrogen atoms were determined from the geometric concepts and refined in a riding model with isotropic temperature factors of 1.2 times the U<sub>eq</sub> value of the parent atom. All non-hydrogen atoms were located from difference Fourier synthesis and refined by least squares method in the full-matrix anisotropic approximation. Disordered solvent was omitted from the refinement of 4a and 5b, using a solvent mask in those structures [4,5]. In structure 5a disorder modeling was used with the atomic occupancy at 50% due to the best divergence coefficient for this model [6]. The crystallographic data for compounds and details of X-ray experiment are collected in the Supplementary information Tables. The structure drawings in ESI were prepared by using Mercury program [7]. The coordinates of atoms and other parameters for structures were deposited with the Cambridge Crystallographic Data Centre: 2354247 for [Ag(IPr\*<sup>Thia</sup>)Cl] 4a, 2354248 for [Ag(IPr\*<sup>MeOThia</sup>)Cl] 4b, 2354249 for [Pd(IPr\*<sup>Thia</sup>)Cl<sub>2</sub>] 5a, 2354250 for [Pd(IPr\*<sup>MeOThia</sup>)Cl<sub>2</sub>] 5b, 2372438 for [Se(IPr\*<sup>MeOThia</sup>)Cl<sub>2</sub>] 6b; 12 Union Road, Cambridge CB2 1EZ, UK (Fax, \_44-(1223)336-033, E-mail [deposit@ccdc.cam.ac.uk](mailto:deposit@ccdc.cam.ac.uk)).

**Figure S1.** Molecular structures of [Ag(IPr\*<sup>Thia</sup>)Cl], [Ag(IPr\*<sup>MeOThia</sup>)Cl], [Pd(IPr\*<sup>Thia</sup>)Cl<sub>2</sub>], [Pd(IPr\*<sup>MeOThia</sup>)Cl<sub>2</sub>] and [(IPr\*<sup>MeOThia</sup>)Se] complexes. Hydrogen atoms and disordered solvent molecules have been omitted for clarity.

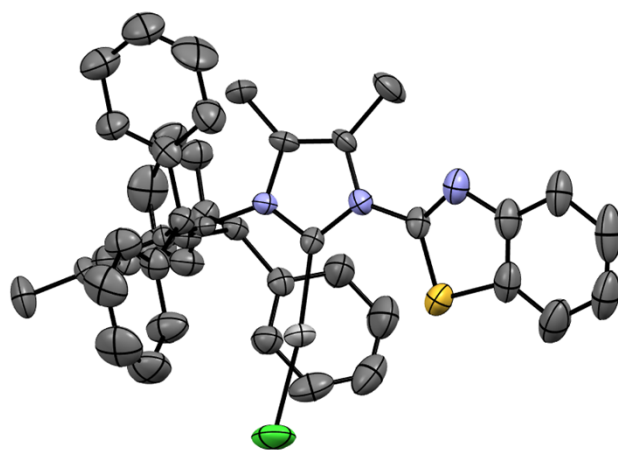

[Ag(IPr\*<sup>Thia</sup>)Cl]

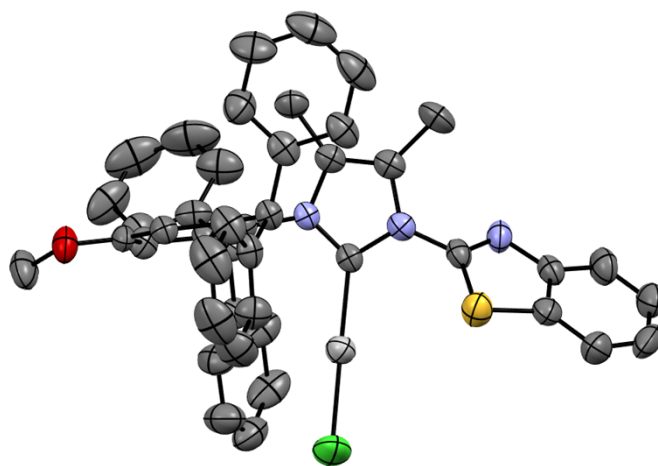

[Ag(IPr\*MeOThia)Cl]

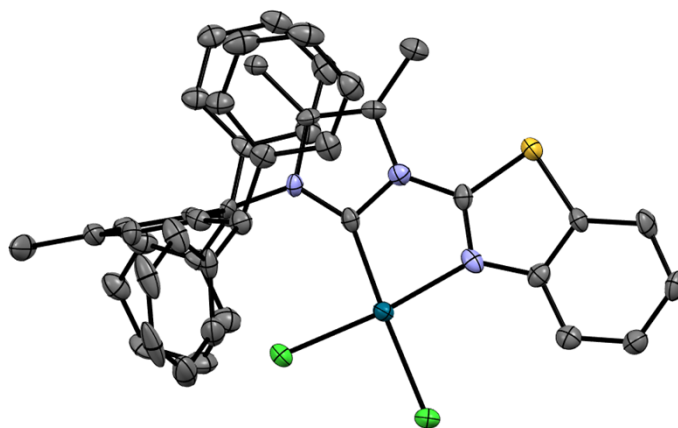

[Pd(IPr\*Thia)Cl<sub>2</sub>]

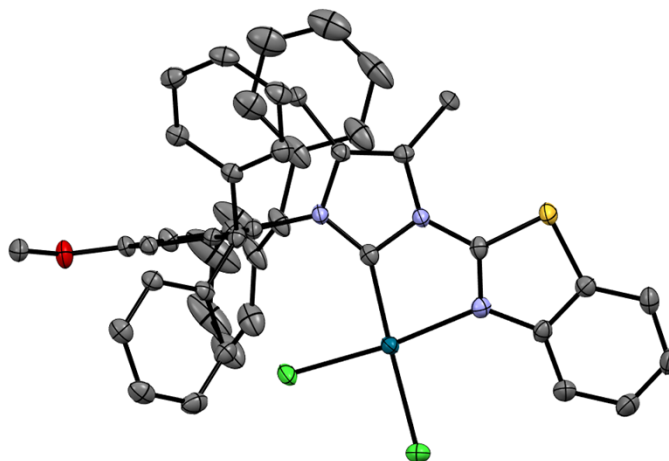

[Pd(IPr\*MeOThia)Cl<sub>2</sub>]

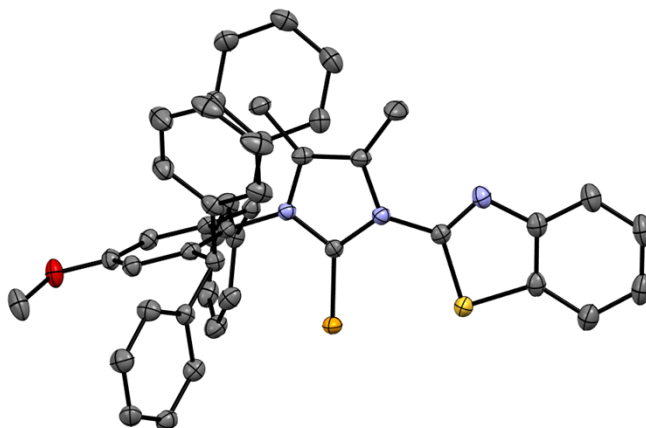

[(IPr\*<sup>MeOThia</sup>)Se]

- [1] CrysAlis CCD; Oxford Diffraction Ltd: Abingdon, England, 2002. CrysAlis RED; Oxford Diffraction Ltd: Abingdon, England, 2002.
- [2] G. M. Sheldrick, A short history of SHELX, *Acta Crystallogr. Sect. A* 64 (2008) 112–122, <https://doi.org/10.1107/S0108767307043930>.
- [3] G. M. Sheldrick, Crystal structure refinement with SHELXL, *Acta Crystallogr. Sect. C* 71 (2015) 3–8, <https://doi.org/10.1107/S2053229614024218>.
- [4] A. L. Spek, *Acta Cryst. D* 65 (2009), 148–155, <https://doi.org/10.1107/S090744490804362X>
- [5] A. L. Spek, *Acta Cryst. C* 71 (2015), 9–18, <https://doi.org/10.1107/S2053229614024929>
- [6] O. V. Dolomanov, L. J. Bourhis, R. J. Gildea, J. A. K. Howard, H. Puschmann, *J. Appl. Cryst.* 42(2009) 339–341, <https://doi.org/10.1107/S0021889808042726>.
- [7] C. F. Macrae, I. J. Bruno, J. A. Chisholm, P. R. Edgington, P. McCabe, E. Pidcock, L. Rodriguez-Monge, R. Taylor, J. van de Streek, P. A. Wood, *J. Appl. Crystallogr.* 41 (2008) 466–470, <http://doi.org/10.1107/S0021889807067908>.

**Table S1.** Experimental details for complexes 4a-5b

|                                                                                                                         | [Ag(IPr*Thia)Cl]4a                                   | [Ag(IPr*MeOThia)Cl] 4b                                | [Pd(IPr*Thia)Cl <sub>2</sub> ] 5a                                  | [Pd(IPr*MeOThia)Cl <sub>2</sub> ] 5b                                |
|-------------------------------------------------------------------------------------------------------------------------|------------------------------------------------------|-------------------------------------------------------|--------------------------------------------------------------------|---------------------------------------------------------------------|
| Crystal data                                                                                                            |                                                      |                                                       |                                                                    |                                                                     |
| Chemical formula                                                                                                        | C <sub>45</sub> H <sub>37</sub> AgClN <sub>3</sub> S | C <sub>45</sub> H <sub>37</sub> AgClN <sub>3</sub> OS | C <sub>47</sub> H <sub>41</sub> Cl <sub>6</sub> N <sub>3</sub> PdS | C <sub>45</sub> H <sub>37</sub> Cl <sub>2</sub> N <sub>3</sub> OPdS |
| <i>M<sub>r</sub></i>                                                                                                    | 795.15                                               | 811.15                                                | 998.99                                                             | 845.13                                                              |
| Crystal system, space group                                                                                             | Monoclinic, <i>P2<sub>1</sub>/c</i>                  | Monoclinic, <i>Cc</i>                                 | Monoclinic, <i>P2<sub>1</sub>/c</i>                                | Orthorhombic, <i>Pbca</i>                                           |
| Temperature (K)                                                                                                         | 293                                                  | 293                                                   | 293                                                                | 100                                                                 |
| <i>a</i> , <i>b</i> , <i>c</i> (Å)                                                                                      | 10.6849<br>(6), 32.091<br>(2), 12.6278 (8)           | 18.9280 (16), 10.7439<br>(13), 20.2390 (17)           | 13.466 (3), 11.2456<br>(11), 28.723 (6)                            | 25.3287 (3), 9.4913<br>(1), 35.0477 (3)                             |
| $\alpha$ , $\beta$ , $\gamma$ (°)                                                                                       | 90, 104.579<br>(6), 90                               | 90, 112.350 (11), 90                                  | 90, 96.010 (16), 90                                                | 90, 90, 90                                                          |
| <i>V</i> (Å <sup>3</sup> )                                                                                              | 4190.6 (5)                                           | 3806.6 (7)                                            | 4325.7 (14)                                                        | 8425.55 (15)                                                        |
| <i>Z</i>                                                                                                                | 4                                                    | 4                                                     | 4                                                                  | 8                                                                   |
| Radiation type                                                                                                          | Mo <i>K</i> $\alpha$                                 | Mo <i>K</i> $\alpha$                                  | Mo <i>K</i> $\alpha$                                               | Cu <i>K</i> $\alpha$                                                |
| $\mu$ (mm <sup>-1</sup> )                                                                                               | 0.63                                                 | 0.69                                                  | 0.89                                                               | 5.46                                                                |
| Crystal size (mm)                                                                                                       | 0.4 × 0.25 × 0.1                                     | 0.4 × 0.3 × 0.2                                       | 0.28 × 0.19 × 0.10                                                 | 0.2 × 0.15 × 0.1                                                    |
| Data collection                                                                                                         |                                                      |                                                       |                                                                    |                                                                     |
| Diffractometer                                                                                                          | KM4, Eos CCD                                         | KM4, Eos CCD                                          | KM4, Eos CCD                                                       | Synergy R, DW, HyPix-Arc 150                                        |
| <i>T<sub>min</sub></i> , <i>T<sub>max</sub></i>                                                                         | 0.829, 0.939                                         | 0.779, 0.870                                          | 0.817, 0.915                                                       | 0.430, 0.579                                                        |
| No. of measured, independent and observed [ <i>I</i> > 2 $\sigma$ ( <i>I</i> )] reflections                             | 18369, 8236, 5007                                    | 7542, 5005, 4210                                      | 20188, 8474, 5955                                                  | 33757, 8078, 7670                                                   |
| <i>R<sub>int</sub></i>                                                                                                  | 0.135                                                | 0.030                                                 | 0.079                                                              | 0.020                                                               |
| ( <i>sin</i> $\theta$ / $\lambda$ ) <sub>max</sub> (Å <sup>-1</sup> )                                                   | 0.617                                                | 0.617                                                 | 0.617                                                              | 0.621                                                               |
| Refinement                                                                                                              |                                                      |                                                       |                                                                    |                                                                     |
| <i>R</i> [ <i>F</i> <sup>2</sup> > 2 $\sigma$ ( <i>F</i> <sup>2</sup> )], <i>wR</i> ( <i>F</i> <sup>2</sup> ), <i>S</i> | 0.072, 0.179, 0.99                                   | 0.051, 0.106, 1.08                                    | 0.062, 0.159, 0.96                                                 | 0.031, 0.079, 1.12                                                  |
| No. of reflections                                                                                                      | 8236                                                 | 5005                                                  | 8474                                                               | 8078                                                                |
| No. of parameters                                                                                                       | 464                                                  | 473                                                   | 562                                                                | 481                                                                 |
| $\Delta\rho_{max}$ , $\Delta\rho_{min}$ (e Å <sup>-3</sup> )                                                            | 0.80, -0.55                                          | 0.88, -0.34                                           | 1.05, -1.42                                                        | 0.49, -0.69                                                         |

Computer programs: CrysAlis CCD (Oxford Diffraction Ltd., 2008), CrysAlis PRO 1.171.42.42a (Rigaku OD, 2022), SHELXS2014/7 (Sheldrick, 2014), SHELXL2014/7 (Sheldrick, 2014), SHELXTL (Sheldrick, 2008). Absorption was corrected for by multi-scan methods, SCALE3 ABSPACK (Rigaku Oxford Diffraction, 2015)

| [Se(IPr*MeOThia)Cl <sub>2</sub> ] 6b |                                                     |
|--------------------------------------|-----------------------------------------------------|
| Chemical formula                     | C <sub>45</sub> H <sub>37</sub> N <sub>3</sub> OSse |
| <i>M<sub>r</sub></i>                 | 746.79                                              |
| Crystal system, space group          | Monoclinic, <i>P2<sub>1</sub>/c</i>                 |
| Temperature (K)                      | 100                                                 |
| <i>a</i> , <i>b</i> , <i>c</i> (Å)   | 20.3298 (3), 10.2556 (1),<br>20.1417 (3)            |

|                                                                            |                                            |
|----------------------------------------------------------------------------|--------------------------------------------|
| $\alpha, \beta, \gamma$ (°)                                                | 90, 118.220 (2), 90                        |
| $V$ (Å <sup>3</sup> )                                                      | 3700.28 (11)                               |
| $Z$                                                                        | 4                                          |
| Radiation type                                                             | Cu $K\alpha$                               |
| $\mu$ (mm <sup>-1</sup> )                                                  | 2.20                                       |
| Crystal size (mm)                                                          | 0.38 × 0.29 × 0.22                         |
| Data collection                                                            |                                            |
| Diffractometer                                                             | XtaLAB Synergy R, DW system, HyPix-Arc 150 |
| $T_{\min}, T_{\max}$                                                       | 0.458, 0.579                               |
| No. of measured, independent and observed [ $I > 2\sigma(I)$ ] reflections | 37461, 7283, 7121                          |
| $R_{\text{int}}$                                                           | 0.020                                      |
| $(\sin \theta/\lambda)_{\text{max}}$ (Å <sup>-1</sup> )                    | 0.628                                      |
| Refinement                                                                 |                                            |
| $R[F^2 > 2\sigma(F^2)], wR(F^2), S$                                        | 0.027, 0.069, 1.06                         |
| No. of reflections                                                         | 7283                                       |
| No. of parameters                                                          | 463                                        |
| $\Delta\rho_{\text{max}}, \Delta\rho_{\text{min}}$ (e Å <sup>-3</sup> )    | 0.26, -0.43                                |

Computer programs: CrysAlis CCD (Oxford Diffraction Ltd., 2008), CrysAlis PRO 1.171.42.42a (Rigaku OD, 2022), SHELXS2014/7 (Sheldrick, 2014), SHELXL2014/7 (Sheldrick, 2014), SHELXL 2014/7 (Sheldrick, 2015), Olex2 1.3 (Dolomanov et al., 2009), SHELXTL (Sheldrick, 2008)

**Table S2.** Selected geometric parameters (Å, °)

| <b>[Ag(IPr*Thia)Cl] 4a</b> |             |          |            |
|----------------------------|-------------|----------|------------|
| Ag1—C1                     | 2.092 (5)   | C21—C22  | 1.390 (9)  |
| Ag1—Cl1                    | 2.3202 (16) | C21—H21  | 0.9300     |
| S1—C39                     | 1.727 (6)   | C22—H22  | 0.9300     |
| S1—C41                     | 1.745 (7)   | C23—H23A | 0.9600     |
| N1—C1                      | 1.359 (6)   | C23—H23B | 0.9600     |
| N1—C2                      | 1.410 (6)   | C23—H23C | 0.9600     |
| N1—C4                      | 1.434 (6)   | C24—C31  | 1.519 (7)  |
| N2—C1                      | 1.353 (6)   | C24—C25  | 1.552 (7)  |
| N2—C39                     | 1.405 (7)   | C24—H24  | 0.9800     |
| N2—C3                      | 1.407 (6)   | C25—C26  | 1.372 (8)  |
| N3—C39                     | 1.282 (7)   | C25—C30  | 1.376 (8)  |
| N3—C40                     | 1.390 (7)   | C26—C27  | 1.388 (9)  |
| C2—C3                      | 1.339 (7)   | C26—H26  | 0.9300     |
| C2—C37                     | 1.475 (7)   | C27—C28  | 1.390 (11) |
| C3—C38                     | 1.505 (7)   | C27—H27  | 0.9300     |
| C4—C5                      | 1.397 (7)   | C28—C29  | 1.366 (10) |
| C4—C9                      | 1.407 (7)   | C28—H28  | 0.9300     |
| C5—C6                      | 1.382 (7)   | C29—C30  | 1.368 (8)  |
| C5—C10                     | 1.507 (7)   | C29—H29  | 0.9300     |
| C6—C7                      | 1.371 (8)   | C30—H30  | 0.9300     |
| C6—H6                      | 0.9300      | C31—C32  | 1.363 (8)  |
| C7—C8                      | 1.382 (8)   | C31—C36  | 1.377 (8)  |
| C7—C23                     | 1.520 (8)   | C32—C33  | 1.397 (9)  |
| C8—C9                      | 1.375 (8)   | C32—H32  | 0.9300     |
| C8—H8                      | 0.9300      | C33—C34  | 1.366 (10) |
| C9—C24                     | 1.530 (7)   | C33—H33  | 0.9300     |
| C10—C11                    | 1.534 (7)   | C34—C35  | 1.344 (11) |
| C10—C17                    | 1.541 (8)   | C34—H34  | 0.9300     |
| C10—H10                    | 0.9800      | C35—C36  | 1.385 (10) |
| C11—C16                    | 1.364 (8)   | C35—H35  | 0.9300     |
| C11—C12                    | 1.406 (9)   | C36—H36  | 0.9300     |
| C12—C13                    | 1.386 (9)   | C37—H37A | 0.9600     |
| C12—H12                    | 0.9300      | C37—H37B | 0.9600     |
| C13—C14                    | 1.341 (10)  | C37—H37C | 0.9600     |
| C13—H13                    | 0.9300      | C38—H38A | 0.9600     |
| C14—C15                    | 1.342 (11)  | C38—H38B | 0.9600     |
| C14—H14                    | 0.9300      | C38—H38C | 0.9600     |
| C15—C16                    | 1.397 (9)   | C40—C41  | 1.391 (10) |
| C15—H15                    | 0.9300      | C40—C45  | 1.391 (9)  |
| C16—H16                    | 0.9300      | C41—C42  | 1.377 (9)  |
| C17—C18                    | 1.353 (8)   | C42—C43  | 1.392 (11) |
| C17—C22                    | 1.367 (8)   | C42—H42  | 0.9300     |
| C18—C19                    | 1.410 (10)  | C43—C44  | 1.366 (12) |
| C18—H18                    | 0.9300      | C43—H43  | 0.9300     |
| C19—C20                    | 1.295 (11)  | C44—C45  | 1.414 (10) |
| C19—H19                    | 0.9300      | C44—H44  | 0.9300     |
| C20—C21                    | 1.367 (11)  | C45—H45  | 0.9300     |

|             |             |               |           |
|-------------|-------------|---------------|-----------|
| C20—H20     | 0.9300      |               |           |
| C1—Ag1—C11  | 172.23 (14) | H23A—C23—H23B | 109.5     |
| C39—S1—C41  | 88.2 (3)    | C7—C23—H23C   | 109.5     |
| C1—N1—C2    | 110.8 (4)   | H23A—C23—H23C | 109.5     |
| C1—N1—C4    | 123.1 (4)   | H23B—C23—H23C | 109.5     |
| C2—N1—C4    | 126.1 (4)   | C31—C24—C9    | 112.1 (4) |
| C1—N2—C39   | 121.6 (4)   | C31—C24—C25   | 112.3 (4) |
| C1—N2—C3    | 111.0 (4)   | C9—C24—C25    | 111.2 (4) |
| C39—N2—C3   | 127.3 (4)   | C31—C24—H24   | 107.0     |
| C39—N3—C40  | 110.0 (5)   | C9—C24—H24    | 107.0     |
| N2—C1—N1    | 104.8 (4)   | C25—C24—H24   | 107.0     |
| N2—C1—Ag1   | 133.7 (4)   | C26—C25—C30   | 119.5 (5) |
| N1—C1—Ag1   | 121.5 (3)   | C26—C25—C24   | 118.2 (5) |
| C3—C2—N1    | 106.6 (4)   | C30—C25—C24   | 122.3 (5) |
| C3—C2—C37   | 131.8 (5)   | C25—C26—C27   | 120.7 (6) |
| N1—C2—C37   | 121.6 (5)   | C25—C26—H26   | 119.6     |
| C2—C3—N2    | 106.8 (4)   | C27—C26—H26   | 119.6     |
| C2—C3—C38   | 129.5 (5)   | C26—C27—C28   | 118.9 (7) |
| N2—C3—C38   | 123.7 (5)   | C26—C27—H27   | 120.5     |
| C5—C4—C9    | 121.9 (5)   | C28—C27—H27   | 120.5     |
| C5—C4—N1    | 119.5 (4)   | C29—C28—C27   | 119.7 (6) |
| C9—C4—N1    | 118.6 (4)   | C29—C28—H28   | 120.2     |
| C6—C5—C4    | 117.3 (5)   | C27—C28—H28   | 120.2     |
| C6—C5—C10   | 122.1 (5)   | C28—C29—C30   | 121.0 (7) |
| C4—C5—C10   | 120.4 (5)   | C28—C29—H29   | 119.5     |
| C7—C6—C5    | 122.4 (5)   | C30—C29—H29   | 119.5     |
| C7—C6—H6    | 118.8       | C29—C30—C25   | 120.2 (6) |
| C5—C6—H6    | 118.8       | C29—C30—H30   | 119.9     |
| C6—C7—C8    | 118.8 (5)   | C25—C30—H30   | 119.9     |
| C6—C7—C23   | 120.9 (5)   | C32—C31—C36   | 118.0 (5) |
| C8—C7—C23   | 120.4 (5)   | C32—C31—C24   | 123.5 (5) |
| C9—C8—C7    | 122.2 (5)   | C36—C31—C24   | 118.5 (5) |
| C9—C8—H8    | 118.9       | C31—C32—C33   | 121.2 (6) |
| C7—C8—H8    | 118.9       | C31—C32—H32   | 119.4     |
| C8—C9—C4    | 117.4 (5)   | C33—C32—H32   | 119.4     |
| C8—C9—C24   | 123.9 (5)   | C34—C33—C32   | 119.5 (7) |
| C4—C9—C24   | 118.5 (5)   | C34—C33—H33   | 120.3     |
| C5—C10—C11  | 113.5 (5)   | C32—C33—H33   | 120.3     |
| C5—C10—C17  | 111.3 (4)   | C35—C34—C33   | 119.8 (7) |
| C11—C10—C17 | 112.3 (5)   | C35—C34—H34   | 120.1     |
| C5—C10—H10  | 106.4       | C33—C34—H34   | 120.1     |
| C11—C10—H10 | 106.4       | C34—C35—C36   | 120.9 (7) |
| C17—C10—H10 | 106.4       | C34—C35—H35   | 119.5     |
| C16—C11—C12 | 117.2 (5)   | C36—C35—H35   | 119.5     |
| C16—C11—C10 | 123.6 (5)   | C31—C36—C35   | 120.5 (7) |
| C12—C11—C10 | 119.1 (5)   | C31—C36—H36   | 119.7     |
| C13—C12—C11 | 120.5 (7)   | C35—C36—H36   | 119.7     |
| C13—C12—H12 | 119.7       | C2—C37—H37A   | 109.5     |



|               |            |                 |            |
|---------------|------------|-----------------|------------|
| C11—C12—H12   | 119.7      | C2—C37—H37B     | 109.5      |
| C14—C13—C12   | 120.8 (7)  | H37A—C37—H37B   | 109.5      |
| C14—C13—H13   | 119.6      | C2—C37—H37C     | 109.5      |
| C12—C13—H13   | 119.6      | H37A—C37—H37C   | 109.5      |
| C13—C14—C15   | 119.7 (7)  | H37B—C37—H37C   | 109.5      |
| C13—C14—H14   | 120.2      | C3—C38—H38A     | 109.5      |
| C15—C14—H14   | 120.2      | C3—C38—H38B     | 109.5      |
| C14—C15—C16   | 121.3 (7)  | H38A—C38—H38B   | 109.5      |
| C14—C15—H15   | 119.3      | C3—C38—H38C     | 109.5      |
| C16—C15—H15   | 119.3      | H38A—C38—H38C   | 109.5      |
| C11—C16—C15   | 120.5 (7)  | H38B—C38—H38C   | 109.5      |
| C11—C16—H16   | 119.7      | N3—C39—N2       | 122.0 (5)  |
| C15—C16—H16   | 119.7      | N3—C39—S1       | 117.5 (4)  |
| C18—C17—C22   | 118.4 (6)  | N2—C39—S1       | 120.5 (4)  |
| C18—C17—C10   | 120.1 (6)  | N3—C40—C41      | 114.9 (6)  |
| C22—C17—C10   | 121.6 (5)  | N3—C40—C45      | 124.9 (7)  |
| C17—C18—C19   | 119.2 (7)  | C41—C40—C45     | 120.2 (6)  |
| C17—C18—H18   | 120.4      | C42—C41—C40     | 122.0 (7)  |
| C19—C18—H18   | 120.4      | C42—C41—S1      | 128.6 (7)  |
| C20—C19—C18   | 122.2 (7)  | C40—C41—S1      | 109.3 (5)  |
| C20—C19—H19   | 118.9      | C41—C42—C43     | 117.7 (8)  |
| C18—C19—H19   | 118.9      | C41—C42—H42     | 121.2      |
| C19—C20—C21   | 119.9 (7)  | C43—C42—H42     | 121.2      |
| C19—C20—H20   | 120.0      | C44—C43—C42     | 121.5 (7)  |
| C21—C20—H20   | 120.0      | C44—C43—H43     | 119.2      |
| C20—C21—C22   | 119.1 (7)  | C42—C43—H43     | 119.2      |
| C20—C21—H21   | 120.4      | C43—C44—C45     | 121.0 (8)  |
| C22—C21—H21   | 120.4      | C43—C44—H44     | 119.5      |
| C17—C22—C21   | 121.1 (6)  | C45—C44—H44     | 119.5      |
| C17—C22—H22   | 119.4      | C40—C45—C44     | 117.5 (8)  |
| C21—C22—H22   | 119.4      | C40—C45—H45     | 121.2      |
| C7—C23—H23A   | 109.5      | C44—C45—H45     | 121.2      |
| C7—C23—H23B   | 109.5      |                 |            |
| C39—N2—C1—N1  | 175.5 (4)  | C22—C17—C18—C19 | 1.4 (10)   |
| C3—N2—C1—N1   | -1.5 (5)   | C10—C17—C18—C19 | 179.8 (6)  |
| C39—N2—C1—Ag1 | -1.7 (7)   | C17—C18—C19—C20 | -1.4 (13)  |
| C3—N2—C1—Ag1  | -178.8 (4) | C18—C19—C20—C21 | 0.8 (14)   |
| C2—N1—C1—N2   | 0.6 (5)    | C19—C20—C21—C22 | -0.3 (13)  |
| C4—N1—C1—N2   | -179.5 (4) | C18—C17—C22—C21 | -0.8 (10)  |
| C2—N1—C1—Ag1  | 178.3 (3)  | C10—C17—C22—C21 | -179.3 (6) |
| C4—N1—C1—Ag1  | -1.9 (6)   | C20—C21—C22—C17 | 0.3 (11)   |
| C1—N1—C2—C3   | 0.5 (6)    | C8—C9—C24—C31   | -98.0 (6)  |
| C4—N1—C2—C3   | -179.3 (5) | C4—C9—C24—C31   | 77.2 (6)   |
| C1—N1—C2—C37  | -178.8 (5) | C8—C9—C24—C25   | 28.6 (7)   |
| C4—N1—C2—C37  | 1.4 (7)    | C4—C9—C24—C25   | -156.1 (4) |
| N1—C2—C3—N2   | -1.4 (6)   | C31—C24—C25—C26 | -140.0 (5) |
| C37—C2—C3—N2  | 177.8 (5)  | C9—C24—C25—C26  | 93.5 (6)   |
| N1—C2—C3—C38  | 176.1 (6)  | C31—C24—C25—C30 | 39.8 (7)   |

|                               |            |                 |            |
|-------------------------------|------------|-----------------|------------|
| C37—C2—C3—C38                 | -4.7 (10)  | C9—C24—C25—C30  | -86.7 (6)  |
| C1—N2—C3—C2                   | 1.9 (6)    | C30—C25—C26—C27 | 0.5 (9)    |
| C39—N2—C3—C2                  | -174.9 (5) | C24—C25—C26—C27 | -179.7 (5) |
| C1—N2—C3—C38                  | -175.8 (5) | C25—C26—C27—C28 | 2.1 (10)   |
| C39—N2—C3—C38                 | 7.4 (8)    | C26—C27—C28—C29 | -2.5 (11)  |
| C1—N1—C4—C5                   | 80.9 (6)   | C27—C28—C29—C30 | 0.2 (12)   |
| C2—N1—C4—C5                   | -99.3 (6)  | C28—C29—C30—C25 | 2.5 (11)   |
| C1—N1—C4—C9                   | -98.4 (5)  | C26—C25—C30—C29 | -2.8 (9)   |
| C2—N1—C4—C9                   | 81.5 (6)   | C24—C25—C30—C29 | 177.4 (6)  |
| C9—C4—C5—C6                   | 0.3 (7)    | C9—C24—C31—C32  | 25.4 (7)   |
| N1—C4—C5—C6                   | -178.9 (4) | C25—C24—C31—C32 | -100.7 (6) |
| C9—C4—C5—C10                  | -175.3 (4) | C9—C24—C31—C36  | -153.4 (5) |
| N1—C4—C5—C10                  | 5.5 (7)    | C25—C24—C31—C36 | 80.6 (6)   |
| C4—C5—C6—C7                   | -0.2 (8)   | C36—C31—C32—C33 | 1.0 (9)    |
| C10—C5—C6—C7                  | 175.3 (5)  | C24—C31—C32—C33 | -177.7 (6) |
| C5—C6—C7—C8                   | -0.1 (9)   | C31—C32—C33—C34 | 0.1 (10)   |
| C5—C6—C7—C23                  | 179.6 (5)  | C32—C33—C34—C35 | -0.2 (11)  |
| C6—C7—C8—C9                   | 0.3 (9)    | C33—C34—C35—C36 | -0.7 (13)  |
| C23—C7—C8—C9                  | -179.4 (6) | C32—C31—C36—C35 | -1.9 (10)  |
| C7—C8—C9—C4                   | -0.2 (8)   | C24—C31—C36—C35 | 176.8 (6)  |
| C7—C8—C9—C24                  | 175.1 (5)  | C34—C35—C36—C31 | 1.8 (13)   |
| C5—C4—C9—C8                   | -0.1 (7)   | C40—N3—C39—N2   | 179.1 (5)  |
| N1—C4—C9—C8                   | 179.1 (4)  | C40—N3—C39—S1   | -1.4 (6)   |
| C5—C4—C9—C24                  | -175.7 (4) | C1—N2—C39—N3    | -155.7 (5) |
| N1—C4—C9—C24                  | 3.5 (6)    | C3—N2—C39—N3    | 20.8 (8)   |
| C6—C5—C10—C11                 | 37.3 (7)   | C1—N2—C39—S1    | 24.8 (6)   |
| C4—C5—C10—C11                 | -147.3 (5) | C3—N2—C39—S1    | -158.6 (4) |
| C6—C5—C10—C17                 | -90.5 (6)  | C41—S1—C39—N3   | 1.7 (5)    |
| C4—C5—C10—C17                 | 84.9 (6)   | C41—S1—C39—N2   | -178.8 (4) |
| C5—C10—C11—C16                | -129.1 (6) | C39—N3—C40—C41  | 0.2 (8)    |
| C17—C10—C11—C16               | -1.7 (8)   | C39—N3—C40—C45  | 179.4 (6)  |
| C5—C10—C11—C12                | 56.2 (7)   | N3—C40—C41—C42  | -178.9 (6) |
| C17—C10—C11—C12               | -176.4 (6) | C45—C40—C41—C42 | 1.9 (10)   |
| C16—C11—C12—C13               | -1.3 (11)  | N3—C40—C41—S1   | 1.0 (7)    |
| C10—C11—C12—C13               | 173.7 (7)  | C45—C40—C41—S1  | -178.2 (5) |
| C11—C12—C13—C14               | 0.6 (13)   | C39—S1—C41—C42  | 178.5 (7)  |
| C12—C13—C14—C15               | 0.6 (14)   | C39—S1—C41—C40  | -1.4 (5)   |
| C13—C14—C15—C16               | -1.0 (14)  | C40—C41—C42—C43 | -2.0 (11)  |
| C12—C11—C16—C15               | 1.0 (10)   | S1—C41—C42—C43  | 178.1 (6)  |
| C10—C11—C16—C15               | -173.8 (6) | C41—C42—C43—C44 | -0.1 (12)  |
| C14—C15—C16—C11               | 0.2 (12)   | C42—C43—C44—C45 | 2.4 (12)   |
| C5—C10—C17—C18                | -135.5 (6) | N3—C40—C45—C44  | -178.8 (6) |
| C11—C10—C17—C18               | 96.0 (7)   | C41—C40—C45—C44 | 0.3 (10)   |
| C5—C10—C17—C22                | 42.9 (7)   | C43—C44—C45—C40 | -2.4 (11)  |
| C11—C10—C17—C22               | -85.6 (7)  |                 |            |
| <b>[Ag(IPr*MeOThia)Cl] 4b</b> |            |                 |            |
| Ag1—C1                        | 2.088 (7)  | C20—H20         | 0.9300     |
| Ag1—Cl1                       | 2.314 (2)  | C21—C22         | 1.388 (16) |

|            |            |               |            |
|------------|------------|---------------|------------|
| S1—C40     | 1.724 (8)  | C21—H21       | 0.9300     |
| S1—C39     | 1.734 (9)  | C22—H22       | 0.9300     |
| O1—C7      | 1.360 (9)  | C23—H23A      | 0.9600     |
| O1—C23     | 1.438 (9)  | C23—H23B      | 0.9600     |
| N1—C1      | 1.339 (9)  | C23—H23C      | 0.9600     |
| N1—C2      | 1.399 (9)  | C24—C31       | 1.520 (11) |
| N1—C4      | 1.450 (9)  | C24—C25       | 1.527 (11) |
| C1—N2      | 1.365 (9)  | C24—H24       | 0.9800     |
| N2—C3      | 1.417 (9)  | C25—C30       | 1.368 (14) |
| N2—C39     | 1.421 (10) | C25—C26       | 1.372 (12) |
| C2—C3      | 1.333 (11) | C26—C27       | 1.409 (17) |
| C2—C37     | 1.488 (11) | C26—H26       | 0.9300     |
| N3—C39     | 1.297 (10) | C27—C28       | 1.40 (2)   |
| N3—C41     | 1.386 (11) | C27—H27       | 0.9300     |
| C3—C38     | 1.489 (11) | C28—C29       | 1.31 (2)   |
| C4—C9      | 1.397 (9)  | C28—H28       | 0.9300     |
| C4—C5      | 1.410 (9)  | C29—C30       | 1.394 (14) |
| C5—C6      | 1.374 (9)  | C29—H29       | 0.9300     |
| C5—C10     | 1.524 (9)  | C30—H30       | 0.9300     |
| C7—C6      | 1.398 (10) | C31—C36       | 1.374 (12) |
| C7—C8      | 1.399 (10) | C31—C32       | 1.396 (11) |
| C6—H6      | 0.9300     | C32—C33       | 1.383 (14) |
| C8—C9      | 1.410 (11) | C32—H32       | 0.9300     |
| C8—H8      | 0.9300     | C33—C34       | 1.354 (17) |
| C9—C24     | 1.522 (10) | C33—H33       | 0.9300     |
| C10—C17    | 1.536 (11) | C34—C35       | 1.369 (16) |
| C10—C11    | 1.539 (12) | C34—H34       | 0.9300     |
| C10—H10    | 0.9800     | C35—C36       | 1.375 (13) |
| C11—C16    | 1.364 (14) | C35—H35       | 0.9300     |
| C11—C12    | 1.375 (12) | C36—H36       | 0.9300     |
| C12—C13    | 1.389 (14) | C37—H37A      | 0.9600     |
| C12—H12    | 0.9300     | C37—H37B      | 0.9600     |
| C13—C14    | 1.381 (17) | C37—H37C      | 0.9600     |
| C13—H13    | 0.9300     | C38—H38A      | 0.9600     |
| C14—C15    | 1.356 (19) | C38—H38B      | 0.9600     |
| C14—H14    | 0.9300     | C38—H38C      | 0.9600     |
| C16—C15    | 1.377 (14) | C40—C41       | 1.400 (12) |
| C16—H16    | 0.9300     | C40—C45       | 1.409 (12) |
| C15—H15    | 0.9300     | C41—C42       | 1.383 (11) |
| C17—C22    | 1.379 (14) | C42—C43       | 1.333 (14) |
| C17—C18    | 1.382 (11) | C42—H42       | 0.9300     |
| C18—C19    | 1.371 (14) | C43—C44       | 1.387 (15) |
| C18—H18    | 0.9300     | C43—H43       | 0.9300     |
| C19—C20    | 1.370 (17) | C44—C45       | 1.359 (14) |
| C19—H19    | 0.9300     | C44—H44       | 0.9300     |
| C20—C21    | 1.377 (18) | C45—H45       | 0.9300     |
| C1—Ag1—Cl1 | 175.8 (2)  | O1—C23—H23B   | 109.5      |
| C40—S1—C39 | 87.4 (4)   | H23A—C23—H23B | 109.5      |

|             |            |               |            |
|-------------|------------|---------------|------------|
| C7—O1—C23   | 117.6 (6)  | O1—C23—H23C   | 109.5      |
| C1—N1—C2    | 112.3 (6)  | H23A—C23—H23C | 109.5      |
| C1—N1—C4    | 124.0 (6)  | H23B—C23—H23C | 109.5      |
| C2—N1—C4    | 123.3 (6)  | C31—C24—C9    | 111.9 (6)  |
| N1—C1—N2    | 103.8 (6)  | C31—C24—C25   | 111.6 (5)  |
| N1—C1—Ag1   | 128.9 (5)  | C9—C24—C25    | 114.8 (6)  |
| N2—C1—Ag1   | 127.3 (5)  | C31—C24—H24   | 105.9      |
| C1—N2—C3    | 111.1 (6)  | C9—C24—H24    | 105.9      |
| C1—N2—C39   | 123.6 (6)  | C25—C24—H24   | 105.9      |
| C3—N2—C39   | 125.4 (6)  | C30—C25—C26   | 117.7 (9)  |
| C3—C2—N1    | 106.9 (7)  | C30—C25—C24   | 123.0 (8)  |
| C3—C2—C37   | 130.8 (7)  | C26—C25—C24   | 119.2 (9)  |
| N1—C2—C37   | 122.3 (7)  | C25—C26—C27   | 120.1 (12) |
| C39—N3—C41  | 109.1 (7)  | C25—C26—H26   | 120.0      |
| C2—C3—N2    | 105.9 (6)  | C27—C26—H26   | 120.0      |
| C2—C3—C38   | 129.7 (8)  | C28—C27—C26   | 119.7 (13) |
| N2—C3—C38   | 124.3 (8)  | C28—C27—H27   | 120.2      |
| C9—C4—C5    | 122.8 (7)  | C26—C27—H27   | 120.2      |
| C9—C4—N1    | 118.9 (6)  | C29—C28—C27   | 119.7 (13) |
| C5—C4—N1    | 118.2 (6)  | C29—C28—H28   | 120.2      |
| C6—C5—C4    | 117.9 (6)  | C27—C28—H28   | 120.2      |
| C6—C5—C10   | 121.7 (6)  | C28—C29—C30   | 120.8 (14) |
| C4—C5—C10   | 120.3 (6)  | C28—C29—H29   | 119.6      |
| O1—C7—C6    | 115.6 (7)  | C30—C29—H29   | 119.6      |
| O1—C7—C8    | 124.2 (7)  | C25—C30—C29   | 122.0 (12) |
| C6—C7—C8    | 120.1 (7)  | C25—C30—H30   | 119.0      |
| C5—C6—C7    | 121.3 (7)  | C29—C30—H30   | 119.0      |
| C5—C6—H6    | 119.3      | C36—C31—C32   | 116.7 (8)  |
| C7—C6—H6    | 119.3      | C36—C31—C24   | 124.6 (7)  |
| C7—C8—C9    | 120.2 (7)  | C32—C31—C24   | 118.7 (8)  |
| C7—C8—H8    | 119.9      | C33—C32—C31   | 120.4 (10) |
| C9—C8—H8    | 119.9      | C33—C32—H32   | 119.8      |
| C4—C9—C8    | 117.6 (7)  | C31—C32—H32   | 119.8      |
| C4—C9—C24   | 121.6 (7)  | C34—C33—C32   | 121.8 (10) |
| C8—C9—C24   | 120.5 (6)  | C34—C33—H33   | 119.1      |
| C5—C10—C17  | 110.2 (6)  | C32—C33—H33   | 119.1      |
| C5—C10—C11  | 112.6 (6)  | C33—C34—C35   | 118.4 (11) |
| C17—C10—C11 | 115.1 (6)  | C33—C34—H34   | 120.8      |
| C5—C10—H10  | 106.1      | C35—C34—H34   | 120.8      |
| C17—C10—H10 | 106.1      | C34—C35—C36   | 120.5 (11) |
| C11—C10—H10 | 106.1      | C34—C35—H35   | 119.7      |
| C16—C11—C12 | 118.7 (9)  | C36—C35—H35   | 119.7      |
| C16—C11—C10 | 121.9 (8)  | C31—C36—C35   | 122.2 (9)  |
| C12—C11—C10 | 119.4 (8)  | C31—C36—H36   | 118.9      |
| C11—C12—C13 | 120.2 (10) | C35—C36—H36   | 118.9      |
| C11—C12—H12 | 119.9      | C2—C37—H37A   | 109.5      |
| C13—C12—H12 | 119.9      | C2—C37—H37B   | 109.5      |
| C14—C13—C12 | 120.3 (10) | H37A—C37—H37B | 109.5      |
| C14—C13—H13 | 119.9      | C2—C37—H37C   | 109.5      |

|               |            |                 |            |
|---------------|------------|-----------------|------------|
| C12—C13—H13   | 119.9      | H37A—C37—H37C   | 109.5      |
| C15—C14—C13   | 118.9 (11) | H37B—C37—H37C   | 109.5      |
| C15—C14—H14   | 120.5      | C3—C38—H38A     | 109.5      |
| C13—C14—H14   | 120.5      | C3—C38—H38B     | 109.5      |
| C11—C16—C15   | 121.2 (11) | H38A—C38—H38B   | 109.5      |
| C11—C16—H16   | 119.4      | C3—C38—H38C     | 109.5      |
| C15—C16—H16   | 119.4      | H38A—C38—H38C   | 109.5      |
| C14—C15—C16   | 120.7 (13) | H38B—C38—H38C   | 109.5      |
| C14—C15—H15   | 119.7      | N3—C39—N2       | 122.2 (8)  |
| C16—C15—H15   | 119.7      | N3—C39—S1       | 118.2 (6)  |
| C22—C17—C18   | 118.0 (8)  | N2—C39—S1       | 119.5 (6)  |
| C22—C17—C10   | 118.7 (8)  | C41—C40—C45     | 120.2 (8)  |
| C18—C17—C10   | 123.4 (8)  | C41—C40—S1      | 110.9 (6)  |
| C19—C18—C17   | 120.7 (10) | C45—C40—S1      | 128.9 (7)  |
| C19—C18—H18   | 119.7      | C42—C41—N3      | 126.6 (9)  |
| C17—C18—H18   | 119.7      | C42—C41—C40     | 119.0 (9)  |
| C20—C19—C18   | 120.8 (10) | N3—C41—C40      | 114.4 (8)  |
| C20—C19—H19   | 119.6      | C43—C42—C41     | 120.4 (10) |
| C18—C19—H19   | 119.6      | C43—C42—H42     | 119.8      |
| C19—C20—C21   | 119.8 (10) | C41—C42—H42     | 119.8      |
| C19—C20—H20   | 120.1      | C42—C43—C44     | 121.2 (9)  |
| C21—C20—H20   | 120.1      | C42—C43—H43     | 119.4      |
| C20—C21—C22   | 118.8 (12) | C44—C43—H43     | 119.4      |
| C20—C21—H21   | 120.6      | C45—C44—C43     | 121.0 (9)  |
| C22—C21—H21   | 120.6      | C45—C44—H44     | 119.5      |
| C17—C22—C21   | 121.8 (11) | C43—C44—H44     | 119.5      |
| C17—C22—H22   | 119.1      | C44—C45—C40     | 118.1 (10) |
| C21—C22—H22   | 119.1      | C44—C45—H45     | 121.0      |
| O1—C23—H23A   | 109.5      | C40—C45—H45     | 121.0      |
|               |            |                 |            |
| C2—N1—C1—N2   | -0.3 (7)   | C11—C10—C17—C18 | 19.5 (11)  |
| C4—N1—C1—N2   | -173.3 (5) | C22—C17—C18—C19 | -0.2 (13)  |
| C2—N1—C1—Ag1  | 178.0 (5)  | C10—C17—C18—C19 | 179.4 (8)  |
| C4—N1—C1—Ag1  | 5.0 (9)    | C17—C18—C19—C20 | 1.5 (16)   |
| N1—C1—N2—C3   | 0.6 (7)    | C18—C19—C20—C21 | -1.8 (18)  |
| Ag1—C1—N2—C3  | -177.7 (5) | C19—C20—C21—C22 | 0.9 (18)   |
| N1—C1—N2—C39  | -178.0 (6) | C18—C17—C22—C21 | -0.7 (15)  |
| Ag1—C1—N2—C39 | 3.6 (9)    | C10—C17—C22—C21 | 179.7 (9)  |
| C1—N1—C2—C3   | -0.1 (8)   | C20—C21—C22—C17 | 0.3 (18)   |
| C4—N1—C2—C3   | 173.0 (6)  | C4—C9—C24—C31   | 94.4 (9)   |
| C1—N1—C2—C37  | -179.4 (6) | C8—C9—C24—C31   | -80.0 (9)  |
| C4—N1—C2—C37  | -6.3 (10)  | C4—C9—C24—C25   | -137.1 (8) |
| N1—C2—C3—N2   | 0.4 (7)    | C8—C9—C24—C25   | 48.5 (10)  |
| C37—C2—C3—N2  | 179.7 (7)  | C31—C24—C25—C30 | 53.2 (10)  |
| N1—C2—C3—C38  | -176.1 (8) | C9—C24—C25—C30  | -75.5 (10) |
| C37—C2—C3—C38 | 3.1 (14)   | C31—C24—C25—C26 | -122.0 (8) |
| C1—N2—C3—C2   | -0.7 (7)   | C9—C24—C25—C26  | 109.3 (9)  |
| C39—N2—C3—C2  | 177.9 (6)  | C30—C25—C26—C27 | -0.1 (15)  |
| C1—N2—C3—C38  | 176.1 (7)  | C24—C25—C26—C27 | 175.3 (9)  |

|                                        |             |                 |            |
|----------------------------------------|-------------|-----------------|------------|
| C39—N2—C3—C38                          | -5.3 (11)   | C25—C26—C27—C28 | 2.4 (19)   |
| C1—N1—C4—C9                            | -97.2 (8)   | C26—C27—C28—C29 | -2 (2)     |
| C2—N1—C4—C9                            | 90.6 (8)    | C27—C28—C29—C30 | -1 (2)     |
| C1—N1—C4—C5                            | 87.6 (8)    | C26—C25—C30—C29 | -2.5 (15)  |
| C2—N1—C4—C5                            | -84.7 (8)   | C24—C25—C30—C29 | -177.8 (9) |
| C9—C4—C5—C6                            | 0.9 (11)    | C28—C29—C30—C25 | 2.9 (18)   |
| N1—C4—C5—C6                            | 175.9 (6)   | C9—C24—C31—C36  | 6.4 (11)   |
| C9—C4—C5—C10                           | 177.2 (7)   | C25—C24—C31—C36 | -123.8 (9) |
| N1—C4—C5—C10                           | -7.7 (10)   | C9—C24—C31—C32  | -173.8 (7) |
| C23—O1—C7—C6                           | -163.3 (8)  | C25—C24—C31—C32 | 55.9 (9)   |
| C23—O1—C7—C8                           | 13.2 (13)   | C36—C31—C32—C33 | -0.8 (12)  |
| C4—C5—C6—C7                            | -2.5 (11)   | C24—C31—C32—C33 | 179.5 (9)  |
| C10—C5—C6—C7                           | -178.8 (7)  | C31—C32—C33—C34 | 1.1 (15)   |
| O1—C7—C6—C5                            | 179.8 (7)   | C32—C33—C34—C35 | -1.6 (17)  |
| C8—C7—C6—C5                            | 3.1 (12)    | C33—C34—C35—C36 | 1.8 (17)   |
| O1—C7—C8—C9                            | -178.4 (8)  | C32—C31—C36—C35 | 1.0 (13)   |
| C6—C7—C8—C9                            | -2.0 (13)   | C24—C31—C36—C35 | -179.3 (9) |
| C5—C4—C9—C8                            | 0.2 (12)    | C34—C35—C36—C31 | -1.5 (17)  |
| N1—C4—C9—C8                            | -174.8 (7)  | C41—N3—C39—N2   | 178.6 (6)  |
| C5—C4—C9—C24                           | -174.3 (7)  | C41—N3—C39—S1   | 1.1 (9)    |
| N1—C4—C9—C24                           | 10.7 (11)   | C1—N2—C39—N3    | 139.0 (7)  |
| C7—C8—C9—C4                            | 0.3 (12)    | C3—N2—C39—N3    | -39.4 (10) |
| C7—C8—C9—C24                           | 174.9 (7)   | C1—N2—C39—S1    | -43.5 (9)  |
| C6—C5—C10—C17                          | 34.1 (10)   | C3—N2—C39—S1    | 138.1 (6)  |
| C4—C5—C10—C17                          | -142.1 (7)  | C40—S1—C39—N3   | -0.4 (7)   |
| C6—C5—C10—C11                          | -95.9 (8)   | C40—S1—C39—N2   | -178.0 (6) |
| C4—C5—C10—C11                          | 87.9 (8)    | C39—S1—C40—C41  | -0.4 (6)   |
| C5—C10—C11—C16                         | 51.1 (10)   | C39—S1—C40—C45  | -179.8 (8) |
| C17—C10—C11—C16                        | -76.3 (10)  | C39—N3—C41—C42  | 178.0 (8)  |
| C5—C10—C11—C12                         | -128.5 (7)  | C39—N3—C41—C40  | -1.5 (10)  |
| C17—C10—C11—C12                        | 104.0 (9)   | C45—C40—C41—C42 | 1.1 (12)   |
| C16—C11—C12—C13                        | -0.6 (13)   | S1—C40—C41—C42  | -178.4 (6) |
| C10—C11—C12—C13                        | 179.1 (7)   | C45—C40—C41—N3  | -179.4 (7) |
| C11—C12—C13—C14                        | -1.0 (14)   | S1—C40—C41—N3   | 1.2 (9)    |
| C12—C13—C14—C15                        | 3.1 (16)    | N3—C41—C42—C43  | 178.5 (9)  |
| C12—C11—C16—C15                        | 0.1 (15)    | C40—C41—C42—C43 | -2.0 (14)  |
| C10—C11—C16—C15                        | -179.6 (9)  | C41—C42—C43—C44 | 1.1 (15)   |
| C13—C14—C15—C16                        | -3.7 (17)   | C42—C43—C44—C45 | 0.7 (16)   |
| C11—C16—C15—C14                        | 2.1 (18)    | C43—C44—C45—C40 | -1.5 (15)  |
| C5—C10—C17—C22                         | 70.6 (10)   | C41—C40—C45—C44 | 0.7 (13)   |
| C11—C10—C17—C22                        | -160.8 (8)  | S1—C40—C45—C44  | 180.0 (7)  |
| C5—C10—C17—C18                         | -109.1 (8)  |                 |            |
| <b>[Pd(IPr*Thia)Cl<sub>2</sub>] 5a</b> |             |                 |            |
| Pd1—C1                                 | 1.985 (5)   | C20—H20         | 0.9300     |
| Pd1—N3                                 | 2.091 (4)   | C21—C22         | 1.376 (8)  |
| Pd1—Cl1                                | 2.2752 (14) | C21—H21         | 0.9300     |
| Pd1—Cl2                                | 2.3563 (12) | C22—H22         | 0.9300     |
| Cl4A—C46                               | 1.83 (2)    | C23—H23A        | 0.9600     |

|          |            |          |           |
|----------|------------|----------|-----------|
| C13A—C46 | 1.72 (2)   | C23—H23B | 0.9600    |
| C14B—C46 | 1.69 (2)   | C23—H23C | 0.9600    |
| C13B—C46 | 1.816 (16) | C24—C31  | 1.525 (7) |
| C15A—C47 | 1.757 (11) | C24—C25  | 1.530 (7) |
| C16A—C47 | 1.64 (2)   | C24—H24  | 0.9800    |
| C15B—C47 | 1.623 (11) | C25—C30  | 1.382 (7) |
| C16B—C47 | 1.81 (2)   | C25—C26  | 1.396 (8) |
| S1—C39   | 1.719 (5)  | C26—C27  | 1.387 (8) |
| S1—C41   | 1.737 (5)  | C26—H26  | 0.9300    |
| N1—C1    | 1.344 (6)  | C27—C28  | 1.384 (8) |
| N1—C2    | 1.418 (6)  | C27—H27  | 0.9300    |
| N1—C4    | 1.440 (6)  | C28—C29  | 1.370 (9) |
| N2—C1    | 1.368 (6)  | C28—H28  | 0.9300    |
| N2—C39   | 1.380 (6)  | C29—C30  | 1.388 (8) |
| N2—C3    | 1.424 (6)  | C29—H29  | 0.9300    |
| N3—C39   | 1.319 (6)  | C30—H30  | 0.9300    |
| N3—C40   | 1.389 (6)  | C31—C32  | 1.385 (7) |
| C2—C3    | 1.341 (7)  | C31—C36  | 1.406 (7) |
| C2—C37   | 1.506 (6)  | C32—C33  | 1.385 (8) |
| C3—C38   | 1.488 (7)  | C32—H32  | 0.9300    |
| C4—C5    | 1.394 (7)  | C33—C34  | 1.382 (8) |
| C4—C9    | 1.414 (7)  | C33—H33  | 0.9300    |
| C5—C6    | 1.404 (7)  | C34—C35  | 1.390 (8) |
| C5—C10   | 1.522 (8)  | C34—H34  | 0.9300    |
| C6—C7    | 1.376 (8)  | C35—C36  | 1.397 (7) |
| C6—H6    | 0.9300     | C35—H35  | 0.9300    |
| C7—C8    | 1.384 (8)  | C36—H36  | 0.9300    |
| C7—C23   | 1.487 (8)  | C37—H37A | 0.9600    |
| C8—C9    | 1.398 (7)  | C37—H37B | 0.9600    |
| C8—H8    | 0.9300     | C37—H37C | 0.9600    |
| C9—C24   | 1.525 (7)  | C38—H38A | 0.9600    |
| C10—C11  | 1.503 (8)  | C38—H38B | 0.9600    |
| C10—C17  | 1.518 (7)  | C38—H38C | 0.9600    |
| C10—H10  | 0.9800     | C40—C41  | 1.391 (7) |
| C11—C12  | 1.391 (8)  | C40—C45  | 1.411 (7) |
| C11—C16  | 1.405 (7)  | C41—C42  | 1.393 (7) |
| C12—C13  | 1.386 (8)  | C42—C43  | 1.398 (8) |
| C12—H12  | 0.9300     | C42—H42  | 0.9300    |
| C13—C14  | 1.402 (8)  | C43—C44  | 1.404 (8) |
| C13—H13  | 0.9300     | C43—H43  | 0.9300    |
| C14—C15  | 1.363 (9)  | C44—C45  | 1.367 (7) |
| C14—H14  | 0.9300     | C44—H44  | 0.9300    |
| C15—C16  | 1.389 (8)  | C45—H45  | 0.9300    |
| C15—H15  | 0.9300     | C46—H46A | 0.9700    |
| C16—H16  | 0.9300     | C46—H46B | 0.9700    |
| C17—C22  | 1.392 (8)  | C46—H46C | 0.9700    |
| C17—C18  | 1.393 (8)  | C46—H46D | 0.9700    |
| C18—C19  | 1.396 (8)  | C47—H47A | 0.9700    |
| C18—H18  | 0.9300     | C47—H47B | 0.9700    |

|             |             |               |           |
|-------------|-------------|---------------|-----------|
| C19—C20     | 1.390 (10)  | C47—H47C      | 0.9700    |
| C19—H19     | 0.9300      | C47—H47D      | 0.9700    |
| C20—C21     | 1.360 (10)  |               |           |
| C1—Pd1—N3   | 80.42 (18)  | C31—C24—H24   | 105.3     |
| C1—Pd1—C11  | 93.22 (14)  | C25—C24—H24   | 105.3     |
| N3—Pd1—C11  | 173.35 (12) | C30—C25—C26   | 118.0 (5) |
| C1—Pd1—C12  | 177.45 (14) | C30—C25—C24   | 118.5 (5) |
| N3—Pd1—C12  | 97.09 (12)  | C26—C25—C24   | 123.6 (5) |
| C11—Pd1—C12 | 89.25 (5)   | C27—C26—C25   | 120.3 (5) |
| C39—S1—C41  | 88.2 (2)    | C27—C26—H26   | 119.8     |
| C1—N1—C2    | 110.5 (4)   | C25—C26—H26   | 119.8     |
| C1—N1—C4    | 128.4 (4)   | C28—C27—C26   | 120.8 (6) |
| C2—N1—C4    | 121.1 (4)   | C28—C27—H27   | 119.6     |
| C1—N2—C39   | 117.6 (4)   | C26—C27—H27   | 119.6     |
| C1—N2—C3    | 110.9 (4)   | C29—C28—C27   | 119.1 (6) |
| C39—N2—C3   | 131.5 (4)   | C29—C28—H28   | 120.4     |
| C39—N3—C40  | 110.3 (4)   | C27—C28—H28   | 120.4     |
| C39—N3—Pd1  | 111.0 (3)   | C28—C29—C30   | 120.3 (5) |
| C40—N3—Pd1  | 138.4 (3)   | C28—C29—H29   | 119.8     |
| N1—C1—N2    | 105.3 (4)   | C30—C29—H29   | 119.8     |
| N1—C1—Pd1   | 141.9 (4)   | C25—C30—C29   | 121.4 (6) |
| N2—C1—Pd1   | 112.8 (3)   | C25—C30—H30   | 119.3     |
| C3—C2—N1    | 107.8 (4)   | C29—C30—H30   | 119.3     |
| C3—C2—C37   | 128.9 (4)   | C32—C31—C36   | 118.3 (5) |
| N1—C2—C37   | 123.2 (4)   | C32—C31—C24   | 119.1 (5) |
| C2—C3—N2    | 105.5 (4)   | C36—C31—C24   | 122.7 (5) |
| C2—C3—C38   | 130.3 (4)   | C33—C32—C31   | 121.7 (5) |
| N2—C3—C38   | 124.2 (4)   | C33—C32—H32   | 119.2     |
| C5—C4—C9    | 121.5 (4)   | C31—C32—H32   | 119.2     |
| C5—C4—N1    | 119.5 (5)   | C34—C33—C32   | 119.5 (5) |
| C9—C4—N1    | 118.8 (4)   | C34—C33—H33   | 120.2     |
| C4—C5—C6    | 117.5 (5)   | C32—C33—H33   | 120.2     |
| C4—C5—C10   | 120.1 (4)   | C33—C34—C35   | 120.6 (5) |
| C6—C5—C10   | 122.2 (5)   | C33—C34—H34   | 119.7     |
| C7—C6—C5    | 122.4 (5)   | C35—C34—H34   | 119.7     |
| C7—C6—H6    | 118.8       | C34—C35—C36   | 119.4 (5) |
| C5—C6—H6    | 118.8       | C34—C35—H35   | 120.3     |
| C6—C7—C8    | 118.6 (5)   | C36—C35—H35   | 120.3     |
| C6—C7—C23   | 120.7 (5)   | C35—C36—C31   | 120.5 (5) |
| C8—C7—C23   | 120.6 (6)   | C35—C36—H36   | 119.7     |
| C7—C8—C9    | 122.1 (5)   | C31—C36—H36   | 119.7     |
| C7—C8—H8    | 119.0       | C2—C37—H37A   | 109.5     |
| C9—C8—H8    | 119.0       | C2—C37—H37B   | 109.5     |
| C8—C9—C4    | 117.5 (5)   | H37A—C37—H37B | 109.5     |
| C8—C9—C24   | 123.2 (5)   | C2—C37—H37C   | 109.5     |
| C4—C9—C24   | 119.2 (4)   | H37A—C37—H37C | 109.5     |
| C11—C10—C17 | 113.8 (4)   | H37B—C37—H37C | 109.5     |
| C11—C10—C5  | 113.4 (4)   | C3—C38—H38A   | 109.5     |



|               |           |               |            |
|---------------|-----------|---------------|------------|
| C17—C10—C5    | 112.1 (4) | C3—C38—H38B   | 109.5      |
| C11—C10—H10   | 105.6     | H38A—C38—H38B | 109.5      |
| C17—C10—H10   | 105.6     | C3—C38—H38C   | 109.5      |
| C5—C10—H10    | 105.6     | H38A—C38—H38C | 109.5      |
| C12—C11—C16   | 117.2 (5) | H38B—C38—H38C | 109.5      |
| C12—C11—C10   | 119.9 (5) | N3—C39—N2     | 118.0 (4)  |
| C16—C11—C10   | 122.8 (5) | N3—C39—S1     | 116.8 (4)  |
| C13—C12—C11   | 121.9 (5) | N2—C39—S1     | 125.2 (4)  |
| C13—C12—H12   | 119.0     | N3—C40—C41    | 113.7 (4)  |
| C11—C12—H12   | 119.0     | N3—C40—C45    | 127.5 (5)  |
| C12—C13—C14   | 118.9 (6) | C41—C40—C45   | 118.9 (5)  |
| C12—C13—H13   | 120.5     | C40—C41—C42   | 122.4 (5)  |
| C14—C13—H13   | 120.5     | C40—C41—S1    | 111.0 (4)  |
| C15—C14—C13   | 120.6 (6) | C42—C41—S1    | 126.5 (4)  |
| C15—C14—H14   | 119.7     | C41—C42—C43   | 117.6 (5)  |
| C13—C14—H14   | 119.7     | C41—C42—H42   | 121.2      |
| C14—C15—C16   | 119.8 (6) | C43—C42—H42   | 121.2      |
| C14—C15—H15   | 120.1     | C42—C43—C44   | 120.4 (5)  |
| C16—C15—H15   | 120.1     | C42—C43—H43   | 119.8      |
| C15—C16—C11   | 121.5 (6) | C44—C43—H43   | 119.8      |
| C15—C16—H16   | 119.3     | C45—C44—C43   | 121.2 (5)  |
| C11—C16—H16   | 119.3     | C45—C44—H44   | 119.4      |
| C22—C17—C18   | 118.7 (5) | C43—C44—H44   | 119.4      |
| C22—C17—C10   | 119.0 (5) | C44—C45—C40   | 119.5 (5)  |
| C18—C17—C10   | 122.3 (5) | C44—C45—H45   | 120.3      |
| C17—C18—C19   | 119.2 (6) | C40—C45—H45   | 120.3      |
| C17—C18—H18   | 120.4     | Cl4B—C46—Cl3B | 112.9 (9)  |
| C19—C18—H18   | 120.4     | Cl3A—C46—Cl4A | 108.7 (10) |
| C20—C19—C18   | 120.7 (6) | Cl3A—C46—H46A | 110.0      |
| C20—C19—H19   | 119.7     | Cl4A—C46—H46A | 110.0      |
| C18—C19—H19   | 119.7     | Cl3A—C46—H46B | 110.0      |
| C21—C20—C19   | 119.9 (6) | Cl4A—C46—H46B | 110.0      |
| C21—C20—H20   | 120.0     | H46A—C46—H46B | 108.3      |
| C19—C20—H20   | 120.0     | Cl4B—C46—H46C | 109.0      |
| C20—C21—C22   | 120.0 (6) | Cl3B—C46—H46C | 109.0      |
| C20—C21—H21   | 120.0     | Cl4B—C46—H46D | 109.0      |
| C22—C21—H21   | 120.0     | Cl3B—C46—H46D | 109.0      |
| C21—C22—C17   | 121.5 (6) | H46C—C46—H46D | 107.8      |
| C21—C22—H22   | 119.2     | Cl6A—C47—Cl5A | 114.7 (7)  |
| C17—C22—H22   | 119.2     | Cl5B—C47—Cl6B | 116.3 (7)  |
| C7—C23—H23A   | 109.5     | Cl6A—C47—H47A | 108.6      |
| C7—C23—H23B   | 109.5     | Cl5A—C47—H47A | 108.6      |
| H23A—C23—H23B | 109.5     | Cl6A—C47—H47B | 108.6      |
| C7—C23—H23C   | 109.5     | Cl5A—C47—H47B | 108.6      |
| H23A—C23—H23C | 109.5     | H47A—C47—H47B | 107.6      |
| H23B—C23—H23C | 109.5     | Cl5B—C47—H47C | 108.2      |
| C9—C24—C31    | 114.0 (4) | Cl6B—C47—H47C | 108.2      |
| C9—C24—C25    | 112.7 (4) | Cl5B—C47—H47D | 108.2      |
| C31—C24—C25   | 113.1 (4) | Cl6B—C47—H47D | 108.2      |

|                 |            |                 |            |
|-----------------|------------|-----------------|------------|
| C9—C24—H24      | 105.3      | H47C—C47—H47D   | 107.4      |
| C2—N1—C1—N2     | -1.0 (5)   | C17—C18—C19—C20 | 0.6 (9)    |
| C4—N1—C1—N2     | -178.8 (4) | C18—C19—C20—C21 | -1.6 (10)  |
| C2—N1—C1—Pd1    | -179.0 (5) | C19—C20—C21—C22 | 1.3 (10)   |
| C4—N1—C1—Pd1    | 3.1 (9)    | C20—C21—C22—C17 | -0.1 (9)   |
| C39—N2—C1—N1    | 178.5 (4)  | C18—C17—C22—C21 | -0.9 (8)   |
| C3—N2—C1—N1     | 1.0 (6)    | C10—C17—C22—C21 | -179.3 (5) |
| C39—N2—C1—Pd1   | -2.7 (6)   | C8—C9—C24—C31   | 101.4 (6)  |
| C3—N2—C1—Pd1    | 179.8 (3)  | C4—C9—C24—C31   | -82.5 (6)  |
| C1—N1—C2—C3     | 0.5 (6)    | C8—C9—C24—C25   | -29.3 (6)  |
| C4—N1—C2—C3     | 178.6 (4)  | C4—C9—C24—C25   | 146.7 (4)  |
| C1—N1—C2—C37    | -177.7 (5) | C9—C24—C25—C30  | -101.5 (6) |
| C4—N1—C2—C37    | 0.3 (7)    | C31—C24—C25—C30 | 127.3 (5)  |
| N1—C2—C3—N2     | 0.1 (5)    | C9—C24—C25—C26  | 77.9 (6)   |
| C37—C2—C3—N2    | 178.2 (5)  | C31—C24—C25—C26 | -53.2 (7)  |
| N1—C2—C3—C38    | 178.4 (5)  | C30—C25—C26—C27 | 0.6 (8)    |
| C37—C2—C3—C38   | -3.4 (10)  | C24—C25—C26—C27 | -178.8 (5) |
| C1—N2—C3—C2     | -0.7 (6)   | C25—C26—C27—C28 | -1.0 (8)   |
| C39—N2—C3—C2    | -177.8 (5) | C26—C27—C28—C29 | -0.4 (9)   |
| C1—N2—C3—C38    | -179.2 (5) | C27—C28—C29—C30 | 2.1 (9)    |
| C39—N2—C3—C38   | 3.8 (9)    | C26—C25—C30—C29 | 1.1 (8)    |
| C1—N1—C4—C5     | 85.9 (6)   | C24—C25—C30—C29 | -179.4 (5) |
| C2—N1—C4—C5     | -91.8 (5)  | C28—C29—C30—C25 | -2.5 (9)   |
| C1—N1—C4—C9     | -98.1 (6)  | C9—C24—C31—C32  | 127.4 (5)  |
| C2—N1—C4—C9     | 84.3 (6)   | C25—C24—C31—C32 | -102.0 (6) |
| C9—C4—C5—C6     | -5.6 (7)   | C9—C24—C31—C36  | -53.2 (7)  |
| N1—C4—C5—C6     | 170.3 (4)  | C25—C24—C31—C36 | 77.3 (6)   |
| C9—C4—C5—C10    | 170.4 (4)  | C36—C31—C32—C33 | 1.4 (8)    |
| N1—C4—C5—C10    | -13.7 (7)  | C24—C31—C32—C33 | -179.2 (5) |
| C4—C5—C6—C7     | -0.5 (7)   | C31—C32—C33—C34 | -1.8 (9)   |
| C10—C5—C6—C7    | -176.4 (5) | C32—C33—C34—C35 | 0.7 (8)    |
| C5—C6—C7—C8     | 4.8 (8)    | C33—C34—C35—C36 | 0.7 (8)    |
| C5—C6—C7—C23    | -179.3 (5) | C34—C35—C36—C31 | -1.0 (8)   |
| C6—C7—C8—C9     | -3.1 (7)   | C32—C31—C36—C35 | 0.0 (8)    |
| C23—C7—C8—C9    | -179.0 (5) | C24—C31—C36—C35 | -179.4 (5) |
| C7—C8—C9—C4     | -2.7 (7)   | C40—N3—C39—N2   | 178.2 (4)  |
| C7—C8—C9—C24    | 173.4 (4)  | Pd1—N3—C39—N2   | 2.9 (6)    |
| C5—C4—C9—C8     | 7.2 (7)    | C40—N3—C39—S1   | 1.3 (6)    |
| N1—C4—C9—C8     | -168.8 (4) | Pd1—N3—C39—S1   | -174.1 (2) |
| C5—C4—C9—C24    | -169.1 (4) | C1—N2—C39—N3    | -0.2 (7)   |
| N1—C4—C9—C24    | 15.0 (6)   | C3—N2—C39—N3    | 176.6 (5)  |
| C4—C5—C10—C11   | 75.3 (6)   | C1—N2—C39—S1    | 176.4 (4)  |
| C6—C5—C10—C11   | -108.9 (5) | C3—N2—C39—S1    | -6.7 (8)   |
| C4—C5—C10—C17   | -154.2 (4) | C41—S1—C39—N3   | -1.4 (4)   |
| C6—C5—C10—C17   | 21.6 (7)   | C41—S1—C39—N2   | -178.1 (5) |
| C17—C10—C11—C12 | 97.2 (6)   | C39—N3—C40—C41  | -0.4 (6)   |
| C5—C10—C11—C12  | -133.2 (5) | Pd1—N3—C40—C41  | 173.0 (4)  |
| C17—C10—C11—C16 | -79.8 (6)  | C39—N3—C40—C45  | 178.5 (5)  |

|                                           |            |                 |            |
|-------------------------------------------|------------|-----------------|------------|
| C5—C10—C11—C16                            | 49.9 (7)   | Pd1—N3—C40—C45  | -8.1 (9)   |
| C16—C11—C12—C13                           | -1.0 (8)   | N3—C40—C41—C42  | 178.3 (5)  |
| C10—C11—C12—C13                           | -178.2 (5) | C45—C40—C41—C42 | -0.7 (8)   |
| C11—C12—C13—C14                           | 2.0 (8)    | N3—C40—C41—S1   | -0.5 (6)   |
| C12—C13—C14—C15                           | -1.6 (9)   | C45—C40—C41—S1  | -179.5 (4) |
| C13—C14—C15—C16                           | 0.2 (9)    | C39—S1—C41—C40  | 1.0 (4)    |
| C14—C15—C16—C11                           | 0.7 (9)    | C39—S1—C41—C42  | -177.8 (5) |
| C12—C11—C16—C15                           | -0.3 (8)   | C40—C41—C42—C43 | 0.7 (8)    |
| C10—C11—C16—C15                           | 176.7 (5)  | S1—C41—C42—C43  | 179.4 (4)  |
| C11—C10—C17—C22                           | -152.0 (5) | C41—C42—C43—C44 | -0.6 (8)   |
| C5—C10—C17—C22                            | 77.7 (6)   | C42—C43—C44—C45 | 0.5 (9)    |
| C11—C10—C17—C18                           | 29.7 (7)   | C43—C44—C45—C40 | -0.5 (8)   |
| C5—C10—C17—C18                            | -100.6 (6) | N3—C40—C45—C44  | -178.3 (5) |
| C22—C17—C18—C19                           | 0.6 (8)    | C41—C40—C45—C44 | 0.6 (8)    |
| C10—C17—C18—C19                           | 178.9 (5)  |                 |            |
| <b>[Pd(IPr*MeOThia)Cl<sub>2</sub>] 5b</b> |            |                 |            |
| Pd1—C1                                    | 1.966 (2)  | C20—C25         | 1.397 (3)  |
| Pd1—N3                                    | 2.091 (2)  | C21—C22         | 1.391 (3)  |
| Pd1—Cl2                                   | 2.2642 (6) | C21—H21         | 0.9500     |
| Pd1—Cl1                                   | 2.3508 (6) | C22—C23         | 1.382 (4)  |
| S1—C4                                     | 1.718 (2)  | C22—H22         | 0.9500     |
| S1—C6                                     | 1.743 (3)  | C23—C24         | 1.386 (4)  |
| N1—C1                                     | 1.377 (3)  | C23—H23         | 0.9500     |
| N1—C4                                     | 1.385 (3)  | C24—C25         | 1.389 (4)  |
| N1—C2                                     | 1.402 (3)  | C24—H24         | 0.9500     |
| N2—C1                                     | 1.345 (3)  | C25—H25         | 0.9500     |
| N2—C3                                     | 1.412 (3)  | C26—C27         | 1.393 (3)  |
| N2—C13                                    | 1.455 (3)  | C26—C31         | 1.400 (3)  |
| N3—C4                                     | 1.304 (3)  | C27—C28         | 1.389 (4)  |
| N3—C5                                     | 1.399 (3)  | C27—H27         | 0.9500     |
| O1—C16                                    | 1.368 (3)  | C28—C29         | 1.386 (4)  |
| O1—C32                                    | 1.423 (3)  | C28—H28         | 0.9500     |
| C2—C3                                     | 1.337 (3)  | C29—C30         | 1.388 (4)  |
| C2—C11                                    | 1.493 (3)  | C29—H29         | 0.9500     |
| C3—C12                                    | 1.487 (3)  | C30—C31         | 1.389 (3)  |
| C5—C10                                    | 1.390 (4)  | C30—H30         | 0.9500     |
| C5—C6                                     | 1.404 (4)  | C31—H31         | 0.9500     |
| C6—C7                                     | 1.395 (3)  | C32—H32A        | 0.9800     |
| C7—C8                                     | 1.382 (4)  | C32—H32B        | 0.9800     |
| C7—H7                                     | 0.9500     | C32—H32C        | 0.9800     |
| C8—C9                                     | 1.401 (4)  | C33—C34         | 1.530 (3)  |
| C8—H8                                     | 0.9500     | C33—C40         | 1.533 (4)  |
| C9—C10                                    | 1.379 (4)  | C33—H33         | 1.0000     |
| C9—H9                                     | 0.9500     | C34—C39         | 1.379 (5)  |
| C10—H10                                   | 0.9500     | C34—C35         | 1.393 (4)  |
| C11—H11A                                  | 0.9800     | C35—C36         | 1.391 (4)  |
| C11—H11B                                  | 0.9800     | C35—H35         | 0.9500     |
| C11—H11C                                  | 0.9800     | C36—C37         | 1.381 (6)  |
| C12—H12A                                  | 0.9800     | C36—H36         | 0.9500     |

|             |             |             |           |
|-------------|-------------|-------------|-----------|
| C12—H12B    | 0.9800      | C37—C38     | 1.369 (6) |
| C12—H12C    | 0.9800      | C37—H37     | 0.9500    |
| C13—C14     | 1.390 (3)   | C38—C39     | 1.391 (5) |
| C13—C18     | 1.403 (3)   | C38—H38     | 0.9500    |
| C14—C15     | 1.395 (3)   | C39—H39     | 0.9500    |
| C14—C19     | 1.538 (3)   | C40—C41     | 1.386 (5) |
| C15—C16     | 1.383 (3)   | C40—C45     | 1.392 (4) |
| C15—H15     | 0.9500      | C41—C42     | 1.398 (5) |
| C16—C17     | 1.397 (3)   | C41—H41     | 0.9500    |
| C17—C18     | 1.383 (3)   | C42—C43     | 1.381 (6) |
| C17—H17     | 0.9500      | C42—H42     | 0.9500    |
| C18—C33     | 1.531 (3)   | C43—C44     | 1.362 (6) |
| C19—C26     | 1.527 (3)   | C43—H43     | 0.9500    |
| C19—C20     | 1.536 (3)   | C44—C45     | 1.413 (5) |
| C19—H19     | 1.0000      | C44—H44     | 0.9500    |
| C20—C21     | 1.394 (3)   | C45—H45     | 0.9500    |
|             |             |             |           |
| C1—Pd1—N3   | 79.77 (9)   | C21—C20—C19 | 123.0 (2) |
| C1—Pd1—C12  | 93.61 (7)   | C25—C20—C19 | 118.5 (2) |
| N3—Pd1—C12  | 173.38 (6)  | C22—C21—C20 | 120.8 (2) |
| C1—Pd1—C11  | 172.78 (7)  | C22—C21—H21 | 119.6     |
| N3—Pd1—C11  | 97.80 (6)   | C20—C21—H21 | 119.6     |
| C12—Pd1—C11 | 88.78 (2)   | C23—C22—C21 | 120.1 (2) |
| C4—S1—C6    | 88.06 (12)  | C23—C22—H22 | 119.9     |
| C1—N1—C4    | 116.5 (2)   | C21—C22—H22 | 119.9     |
| C1—N1—C2    | 111.6 (2)   | C22—C23—C24 | 119.8 (2) |
| C4—N1—C2    | 131.9 (2)   | C22—C23—H23 | 120.1     |
| C1—N2—C3    | 111.07 (19) | C24—C23—H23 | 120.1     |
| C1—N2—C13   | 127.2 (2)   | C23—C24—C25 | 120.2 (2) |
| C3—N2—C13   | 121.72 (19) | C23—C24—H24 | 119.9     |
| C4—N3—C5    | 110.6 (2)   | C25—C24—H24 | 119.9     |
| C4—N3—Pd1   | 111.57 (16) | C24—C25—C20 | 120.6 (2) |
| C5—N3—Pd1   | 136.63 (17) | C24—C25—H25 | 119.7     |
| C16—O1—C32  | 116.79 (19) | C20—C25—H25 | 119.7     |
| N2—C1—N1    | 104.0 (2)   | C27—C26—C31 | 117.8 (2) |
| N2—C1—Pd1   | 142.13 (18) | C27—C26—C19 | 119.5 (2) |
| N1—C1—Pd1   | 113.77 (17) | C31—C26—C19 | 122.6 (2) |
| C3—C2—N1    | 105.8 (2)   | C28—C27—C26 | 121.2 (2) |
| C3—C2—C11   | 129.5 (2)   | C28—C27—H27 | 119.4     |
| N1—C2—C11   | 124.5 (2)   | C26—C27—H27 | 119.4     |
| C2—C3—N2    | 107.5 (2)   | C29—C28—C27 | 120.4 (3) |
| C2—C3—C12   | 129.3 (2)   | C29—C28—H28 | 119.8     |
| N2—C3—C12   | 123.1 (2)   | C27—C28—H28 | 119.8     |
| N3—C4—N1    | 117.3 (2)   | C28—C29—C30 | 119.1 (2) |
| N3—C4—S1    | 117.47 (18) | C28—C29—H29 | 120.5     |
| N1—C4—S1    | 125.15 (18) | C30—C29—H29 | 120.5     |
| C10—C5—N3   | 127.7 (2)   | C29—C30—C31 | 120.6 (2) |
| C10—C5—C6   | 119.3 (2)   | C29—C30—H30 | 119.7     |
| N3—C5—C6    | 112.9 (2)   | C31—C30—H30 | 119.7     |

|               |             |               |           |
|---------------|-------------|---------------|-----------|
| C7—C6—C5      | 122.3 (2)   | C30—C31—C26   | 120.9 (2) |
| C7—C6—S1      | 126.8 (2)   | C30—C31—H31   | 119.6     |
| C5—C6—S1      | 110.88 (18) | C26—C31—H31   | 119.6     |
| C8—C7—C6      | 117.1 (2)   | O1—C32—H32A   | 109.5     |
| C8—C7—H7      | 121.4       | O1—C32—H32B   | 109.5     |
| C6—C7—H7      | 121.4       | H32A—C32—H32B | 109.5     |
| C7—C8—C9      | 121.0 (2)   | O1—C32—H32C   | 109.5     |
| C7—C8—H8      | 119.5       | H32A—C32—H32C | 109.5     |
| C9—C8—H8      | 119.5       | H32B—C32—H32C | 109.5     |
| C10—C9—C8     | 121.5 (3)   | C34—C33—C18   | 111.7 (2) |
| C10—C9—H9     | 119.3       | C34—C33—C40   | 113.7 (2) |
| C8—C9—H9      | 119.3       | C18—C33—C40   | 110.1 (2) |
| C9—C10—C5     | 118.6 (3)   | C34—C33—H33   | 107.0     |
| C9—C10—H10    | 120.7       | C18—C33—H33   | 107.0     |
| C5—C10—H10    | 120.7       | C40—C33—H33   | 107.0     |
| C2—C11—H11A   | 109.5       | C39—C34—C35   | 118.3 (3) |
| C2—C11—H11B   | 109.5       | C39—C34—C33   | 123.4 (3) |
| H11A—C11—H11B | 109.5       | C35—C34—C33   | 118.3 (3) |
| C2—C11—H11C   | 109.5       | C36—C35—C34   | 120.9 (3) |
| H11A—C11—H11C | 109.5       | C36—C35—H35   | 119.6     |
| H11B—C11—H11C | 109.5       | C34—C35—H35   | 119.6     |
| C3—C12—H12A   | 109.5       | C37—C36—C35   | 119.7 (3) |
| C3—C12—H12B   | 109.5       | C37—C36—H36   | 120.2     |
| H12A—C12—H12B | 109.5       | C35—C36—H36   | 120.2     |
| C3—C12—H12C   | 109.5       | C38—C37—C36   | 119.9 (3) |
| H12A—C12—H12C | 109.5       | C38—C37—H37   | 120.0     |
| H12B—C12—H12C | 109.5       | C36—C37—H37   | 120.0     |
| C14—C13—C18   | 122.5 (2)   | C37—C38—C39   | 120.3 (4) |
| C14—C13—N2    | 118.7 (2)   | C37—C38—H38   | 119.8     |
| C18—C13—N2    | 118.7 (2)   | C39—C38—H38   | 119.8     |
| C13—C14—C15   | 117.9 (2)   | C34—C39—C38   | 120.9 (4) |
| C13—C14—C19   | 122.1 (2)   | C34—C39—H39   | 119.6     |
| C15—C14—C19   | 120.0 (2)   | C38—C39—H39   | 119.6     |
| C16—C15—C14   | 120.7 (2)   | C41—C40—C45   | 118.5 (3) |
| C16—C15—H15   | 119.6       | C41—C40—C33   | 122.3 (3) |
| C14—C15—H15   | 119.6       | C45—C40—C33   | 119.2 (3) |
| O1—C16—C15    | 124.8 (2)   | C40—C41—C42   | 121.2 (3) |
| O1—C16—C17    | 115.0 (2)   | C40—C41—H41   | 119.4     |
| C15—C16—C17   | 120.2 (2)   | C42—C41—H41   | 119.4     |
| C18—C17—C16   | 120.6 (2)   | C43—C42—C41   | 119.6 (4) |
| C18—C17—H17   | 119.7       | C43—C42—H42   | 120.2     |
| C16—C17—H17   | 119.7       | C41—C42—H42   | 120.2     |
| C17—C18—C13   | 118.0 (2)   | C44—C43—C42   | 120.4 (4) |
| C17—C18—C33   | 121.1 (2)   | C44—C43—H43   | 119.8     |
| C13—C18—C33   | 120.9 (2)   | C42—C43—H43   | 119.8     |
| C26—C19—C20   | 113.21 (19) | C43—C44—C45   | 120.2 (3) |
| C26—C19—C14   | 112.78 (19) | C43—C44—H44   | 119.9     |
| C20—C19—C14   | 110.08 (18) | C45—C44—H44   | 119.9     |
| C26—C19—H19   | 106.8       | C40—C45—C44   | 120.1 (4) |

|               |              |                 |            |
|---------------|--------------|-----------------|------------|
| C20—C19—H19   | 106.8        | C40—C45—H45     | 120.0      |
| C14—C19—H19   | 106.8        | C44—C45—H45     | 120.0      |
| C21—C20—C25   | 118.5 (2)    |                 |            |
| C3—N2—C1—N1   | 1.6 (3)      | C16—C17—C18—C13 | 0.6 (4)    |
| C13—N2—C1—N1  | 178.8 (2)    | C16—C17—C18—C33 | -178.8 (2) |
| C3—N2—C1—Pd1  | 176.7 (2)    | C14—C13—C18—C17 | 1.0 (4)    |
| C13—N2—C1—Pd1 | -6.0 (4)     | N2—C13—C18—C17  | -175.2 (2) |
| C4—N1—C1—N2   | 178.08 (19)  | C14—C13—C18—C33 | -179.6 (2) |
| C2—N1—C1—N2   | -1.8 (3)     | N2—C13—C18—C33  | 4.2 (4)    |
| C4—N1—C1—Pd1  | 1.3 (3)      | C13—C14—C19—C26 | 95.7 (3)   |
| C2—N1—C1—Pd1  | -178.61 (16) | C15—C14—C19—C26 | -85.7 (3)  |
| C1—N1—C2—C3   | 1.4 (3)      | C13—C14—C19—C20 | -136.8 (2) |
| C4—N1—C2—C3   | -178.5 (2)   | C15—C14—C19—C20 | 41.8 (3)   |
| C1—N1—C2—C11  | -173.0 (2)   | C26—C19—C20—C21 | 28.6 (3)   |
| C4—N1—C2—C11  | 7.1 (4)      | C14—C19—C20—C21 | -98.6 (3)  |
| N1—C2—C3—N2   | -0.4 (3)     | C26—C19—C20—C25 | -154.9 (2) |
| C11—C2—C3—N2  | 173.6 (3)    | C14—C19—C20—C25 | 77.8 (3)   |
| N1—C2—C3—C12  | -177.5 (2)   | C25—C20—C21—C22 | -2.2 (3)   |
| C11—C2—C3—C12 | -3.5 (5)     | C19—C20—C21—C22 | 174.3 (2)  |
| C1—N2—C3—C2   | -0.7 (3)     | C20—C21—C22—C23 | 1.0 (4)    |
| C13—N2—C3—C2  | -178.2 (2)   | C21—C22—C23—C24 | 0.9 (4)    |
| C1—N2—C3—C12  | 176.6 (2)    | C22—C23—C24—C25 | -1.4 (4)   |
| C13—N2—C3—C12 | -0.9 (3)     | C23—C24—C25—C20 | 0.2 (4)    |
| C5—N3—C4—N1   | 179.1 (2)    | C21—C20—C25—C24 | 1.6 (4)    |
| Pd1—N3—C4—N1  | -11.3 (3)    | C19—C20—C25—C24 | -175.0 (2) |
| C5—N3—C4—S1   | -2.6 (3)     | C20—C19—C26—C27 | 98.0 (3)   |
| Pd1—N3—C4—S1  | 167.04 (12)  | C14—C19—C26—C27 | -136.2 (2) |
| C1—N1—C4—N3   | 7.1 (3)      | C20—C19—C26—C31 | -79.9 (3)  |
| C2—N1—C4—N3   | -173.0 (2)   | C14—C19—C26—C31 | 45.9 (3)   |
| C1—N1—C4—S1   | -171.06 (18) | C31—C26—C27—C28 | 0.3 (4)    |
| C2—N1—C4—S1   | 8.8 (4)      | C19—C26—C27—C28 | -177.7 (2) |
| C6—S1—C4—N3   | 1.1 (2)      | C26—C27—C28—C29 | -0.1 (4)   |
| C6—S1—C4—N1   | 179.2 (2)    | C27—C28—C29—C30 | 0.2 (4)    |
| C4—N3—C5—C10  | -174.5 (2)   | C28—C29—C30—C31 | -0.4 (4)   |
| Pd1—N3—C5—C10 | 19.6 (4)     | C29—C30—C31—C26 | 0.5 (4)    |
| C4—N3—C5—C6   | 3.1 (3)      | C27—C26—C31—C30 | -0.5 (4)   |
| Pd1—N3—C5—C6  | -162.78 (17) | C19—C26—C31—C30 | 177.5 (2)  |
| C10—C5—C6—C7  | -3.7 (4)     | C17—C18—C33—C34 | -25.7 (4)  |
| N3—C5—C6—C7   | 178.5 (2)    | C13—C18—C33—C34 | 154.9 (3)  |
| C10—C5—C6—S1  | 175.51 (19)  | C17—C18—C33—C40 | 101.7 (3)  |
| N3—C5—C6—S1   | -2.3 (3)     | C13—C18—C33—C40 | -77.7 (3)  |
| C4—S1—C6—C7   | 179.9 (2)    | C18—C33—C34—C39 | 111.2 (3)  |
| C4—S1—C6—C5   | 0.77 (19)    | C40—C33—C34—C39 | -14.2 (4)  |
| C5—C6—C7—C8   | 0.9 (4)      | C18—C33—C34—C35 | -68.1 (3)  |
| S1—C6—C7—C8   | -178.2 (2)   | C40—C33—C34—C35 | 166.5 (3)  |
| C6—C7—C8—C9   | 2.3 (4)      | C39—C34—C35—C36 | -0.6 (5)   |
| C7—C8—C9—C10  | -2.7 (4)     | C33—C34—C35—C36 | 178.7 (3)  |
| C8—C9—C10—C5  | -0.2 (4)     | C34—C35—C36—C37 | 0.7 (5)    |

|                                           |             |                 |            |
|-------------------------------------------|-------------|-----------------|------------|
| N3—C5—C10—C9                              | -179.3 (2)  | C35—C36—C37—C38 | -0.2 (6)   |
| C6—C5—C10—C9                              | 3.3 (4)     | C36—C37—C38—C39 | -0.5 (7)   |
| C1—N2—C13—C14                             | 100.7 (3)   | C35—C34—C39—C38 | -0.1 (6)   |
| C3—N2—C13—C14                             | -82.3 (3)   | C33—C34—C39—C38 | -179.4 (4) |
| C1—N2—C13—C18                             | -83.0 (3)   | C37—C38—C39—C34 | 0.7 (7)    |
| C3—N2—C13—C18                             | 94.0 (3)    | C34—C33—C40—C41 | 77.8 (3)   |
| C18—C13—C14—C15                           | -1.4 (4)    | C18—C33—C40—C41 | -48.4 (3)  |
| N2—C13—C14—C15                            | 174.8 (2)   | C34—C33—C40—C45 | -102.1 (3) |
| C18—C13—C14—C19                           | 177.3 (2)   | C18—C33—C40—C45 | 131.7 (3)  |
| N2—C13—C14—C19                            | -6.6 (3)    | C45—C40—C41—C42 | 0.5 (4)    |
| C13—C14—C15—C16                           | 0.1 (3)     | C33—C40—C41—C42 | -179.5 (3) |
| C19—C14—C15—C16                           | -178.5 (2)  | C40—C41—C42—C43 | -0.8 (5)   |
| C32—O1—C16—C15                            | 11.6 (3)    | C41—C42—C43—C44 | 0.6 (5)    |
| C32—O1—C16—C17                            | -169.5 (2)  | C42—C43—C44—C45 | -0.1 (5)   |
| C14—C15—C16—O1                            | -179.7 (2)  | C41—C40—C45—C44 | 0.1 (4)    |
| C14—C15—C16—C17                           | 1.4 (4)     | C33—C40—C45—C44 | -180.0 (3) |
| O1—C16—C17—C18                            | 179.2 (2)   | C43—C44—C45—C40 | -0.3 (5)   |
| C15—C16—C17—C18                           | -1.8 (4)    |                 |            |
| <b>[Se(IPr*MeOThia)Cl<sub>2</sub>] 6b</b> |             |                 |            |
| Se1—C1                                    | 1.8198 (14) | C21—C22         | 1.388 (2)  |
| S1—C45                                    | 1.7427 (15) | C21—H21         | 0.9500     |
| S1—C39                                    | 1.7545 (15) | C22—H22         | 0.9500     |
| O1—C7                                     | 1.3654 (17) | C23—H23A        | 0.9800     |
| O1—C23                                    | 1.431 (2)   | C23—H23B        | 0.9800     |
| N1—C1                                     | 1.3576 (18) | C23—H23C        | 0.9800     |
| N1—C2                                     | 1.3997 (17) | C24—C31         | 1.520 (2)  |
| N1—C4                                     | 1.4432 (17) | C24—C25         | 1.526 (2)  |
| N2—C1                                     | 1.3850 (17) | C24—H24         | 1.0000     |
| N2—C39                                    | 1.4107 (18) | C25—C30         | 1.387 (2)  |
| N2—C3                                     | 1.4250 (18) | C25—C26         | 1.401 (2)  |
| N3—C39                                    | 1.2945 (18) | C26—C27         | 1.382 (2)  |
| N3—C40                                    | 1.391 (2)   | C26—H26         | 0.9500     |
| C2—C3                                     | 1.343 (2)   | C27—C28         | 1.390 (2)  |
| C2—C37                                    | 1.491 (2)   | C27—H27         | 0.9500     |
| C3—C38                                    | 1.492 (2)   | C28—C29         | 1.375 (2)  |
| C4—C5                                     | 1.392 (2)   | C28—H28         | 0.9500     |
| C4—C9                                     | 1.4019 (19) | C29—C30         | 1.394 (2)  |
| C5—C6                                     | 1.397 (2)   | C29—H29         | 0.9500     |
| C5—C10                                    | 1.5300 (19) | C30—H30         | 0.9500     |
| C6—C7                                     | 1.389 (2)   | C31—C32         | 1.390 (2)  |
| C6—H6                                     | 0.9500      | C31—C36         | 1.391 (2)  |
| C7—C8                                     | 1.396 (2)   | C32—C33         | 1.388 (2)  |
| C8—C9                                     | 1.386 (2)   | C32—H32         | 0.9500     |
| C8—H8                                     | 0.9500      | C33—C34         | 1.387 (3)  |
| C9—C24                                    | 1.528 (2)   | C33—H33         | 0.9500     |
| C10—C11                                   | 1.520 (2)   | C34—C35         | 1.384 (2)  |
| C10—C17                                   | 1.528 (2)   | C34—H34         | 0.9500     |
| C10—H10                                   | 1.0000      | C35—C36         | 1.392 (2)  |

|            |             |               |             |
|------------|-------------|---------------|-------------|
| C11—C16    | 1.390 (2)   | C35—H35       | 0.9500      |
| C11—C12    | 1.391 (2)   | C36—H36       | 0.9500      |
| C12—C13    | 1.390 (2)   | C37—H37A      | 0.9800      |
| C12—H12    | 0.9500      | C37—H37B      | 0.9800      |
| C13—C14    | 1.381 (3)   | C37—H37C      | 0.9800      |
| C13—H13    | 0.9500      | C38—H38A      | 0.9800      |
| C14—C15    | 1.384 (3)   | C38—H38B      | 0.9800      |
| C14—H14    | 0.9500      | C38—H38C      | 0.9800      |
| C15—C16    | 1.393 (2)   | C40—C45       | 1.396 (2)   |
| C15—H15    | 0.9500      | C40—C41       | 1.399 (2)   |
| C16—H16    | 0.9500      | C41—C42       | 1.382 (3)   |
| C17—C18    | 1.391 (2)   | C41—H41       | 0.9500      |
| C17—C22    | 1.394 (2)   | C42—C43       | 1.395 (3)   |
| C18—C19    | 1.392 (2)   | C42—H42       | 0.9500      |
| C18—H18    | 0.9500      | C43—C44       | 1.385 (2)   |
| C19—C20    | 1.381 (2)   | C43—H43       | 0.9500      |
| C19—H19    | 0.9500      | C44—C45       | 1.395 (2)   |
| C20—C21    | 1.386 (2)   | C44—H44       | 0.9500      |
| C20—H20    | 0.9500      |               |             |
| C45—S1—C39 | 87.69 (7)   | H23A—C23—H23B | 109.5       |
| C7—O1—C23  | 116.86 (12) | O1—C23—H23C   | 109.5       |
| C1—N1—C2   | 110.93 (11) | H23A—C23—H23C | 109.5       |
| C1—N1—C4   | 123.98 (11) | H23B—C23—H23C | 109.5       |
| C2—N1—C4   | 124.80 (12) | C31—C24—C25   | 114.01 (12) |
| C1—N2—C39  | 126.08 (12) | C31—C24—C9    | 112.04 (12) |
| C1—N2—C3   | 109.30 (11) | C25—C24—C9    | 112.25 (12) |
| C39—N2—C3  | 124.46 (12) | C31—C24—H24   | 105.9       |
| C39—N3—C40 | 109.88 (13) | C25—C24—H24   | 105.9       |
| N1—C1—N2   | 105.29 (11) | C9—C24—H24    | 105.9       |
| N1—C1—Se1  | 124.93 (10) | C30—C25—C26   | 118.24 (14) |
| N2—C1—Se1  | 129.77 (10) | C30—C25—C24   | 123.62 (14) |
| C3—C2—N1   | 107.66 (12) | C26—C25—C24   | 118.12 (13) |
| C3—C2—C37  | 129.55 (13) | C27—C26—C25   | 121.09 (14) |
| N1—C2—C37  | 122.78 (13) | C27—C26—H26   | 119.5       |
| C2—C3—N2   | 106.81 (12) | C25—C26—H26   | 119.5       |
| C2—C3—C38  | 126.83 (14) | C26—C27—C28   | 120.09 (15) |
| N2—C3—C38  | 126.21 (13) | C26—C27—H27   | 120.0       |
| C5—C4—C9   | 121.94 (13) | C28—C27—H27   | 120.0       |
| C5—C4—N1   | 118.68 (12) | C29—C28—C27   | 119.30 (15) |
| C9—C4—N1   | 119.37 (12) | C29—C28—H28   | 120.3       |
| C4—C5—C6   | 118.53 (13) | C27—C28—H28   | 120.3       |
| C4—C5—C10  | 121.07 (12) | C28—C29—C30   | 120.85 (15) |
| C6—C5—C10  | 120.35 (13) | C28—C29—H29   | 119.6       |
| C7—C6—C5   | 120.09 (13) | C30—C29—H29   | 119.6       |
| C7—C6—H6   | 120.0       | C25—C30—C29   | 120.42 (15) |
| C5—C6—H6   | 120.0       | C25—C30—H30   | 119.8       |
| O1—C7—C6   | 123.64 (13) | C29—C30—H30   | 119.8       |
| O1—C7—C8   | 115.75 (13) | C32—C31—C36   | 118.57 (14) |
| C6—C7—C8   | 120.57 (13) | C32—C31—C24   | 119.47 (13) |



|             |             |               |             |
|-------------|-------------|---------------|-------------|
| C9—C8—C7    | 120.33 (13) | C36—C31—C24   | 121.96 (13) |
| C9—C8—H8    | 119.8       | C33—C32—C31   | 121.14 (15) |
| C7—C8—H8    | 119.8       | C33—C32—H32   | 119.4       |
| C8—C9—C4    | 118.39 (13) | C31—C32—H32   | 119.4       |
| C8—C9—C24   | 122.12 (13) | C34—C33—C32   | 119.78 (15) |
| C4—C9—C24   | 119.40 (12) | C34—C33—H33   | 120.1       |
| C11—C10—C17 | 113.19 (12) | C32—C33—H33   | 120.1       |
| C11—C10—C5  | 112.90 (12) | C35—C34—C33   | 119.73 (15) |
| C17—C10—C5  | 110.48 (11) | C35—C34—H34   | 120.1       |
| C11—C10—H10 | 106.6       | C33—C34—H34   | 120.1       |
| C17—C10—H10 | 106.6       | C34—C35—C36   | 120.26 (15) |
| C5—C10—H10  | 106.6       | C34—C35—H35   | 119.9       |
| C16—C11—C12 | 118.45 (15) | C36—C35—H35   | 119.9       |
| C16—C11—C10 | 122.04 (13) | C31—C36—C35   | 120.52 (15) |
| C12—C11—C10 | 119.47 (14) | C31—C36—H36   | 119.7       |
| C13—C12—C11 | 120.94 (17) | C35—C36—H36   | 119.7       |
| C13—C12—H12 | 119.5       | C2—C37—H37A   | 109.5       |
| C11—C12—H12 | 119.5       | C2—C37—H37B   | 109.5       |
| C14—C13—C12 | 120.20 (16) | H37A—C37—H37B | 109.5       |
| C14—C13—H13 | 119.9       | C2—C37—H37C   | 109.5       |
| C12—C13—H13 | 119.9       | H37A—C37—H37C | 109.5       |
| C13—C14—C15 | 119.46 (16) | H37B—C37—H37C | 109.5       |
| C13—C14—H14 | 120.3       | C3—C38—H38A   | 109.5       |
| C15—C14—H14 | 120.3       | C3—C38—H38B   | 109.5       |
| C14—C15—C16 | 120.36 (17) | H38A—C38—H38B | 109.5       |
| C14—C15—H15 | 119.8       | C3—C38—H38C   | 109.5       |
| C16—C15—H15 | 119.8       | H38A—C38—H38C | 109.5       |
| C11—C16—C15 | 120.56 (16) | H38B—C38—H38C | 109.5       |
| C11—C16—H16 | 119.7       | N3—C39—N2     | 120.18 (13) |
| C15—C16—H16 | 119.7       | N3—C39—S1     | 117.19 (11) |
| C18—C17—C22 | 118.73 (14) | N2—C39—S1     | 122.63 (10) |
| C18—C17—C10 | 123.09 (13) | N3—C40—C45    | 115.02 (13) |
| C22—C17—C10 | 118.17 (13) | N3—C40—C41    | 125.09 (15) |
| C17—C18—C19 | 120.17 (15) | C45—C40—C41   | 119.89 (15) |
| C17—C18—H18 | 119.9       | C42—C41—C40   | 118.63 (17) |
| C19—C18—H18 | 119.9       | C42—C41—H41   | 120.7       |
| C20—C19—C18 | 120.73 (15) | C40—C41—H41   | 120.7       |
| C20—C19—H19 | 119.6       | C41—C42—C43   | 121.01 (16) |
| C18—C19—H19 | 119.6       | C41—C42—H42   | 119.5       |
| C19—C20—C21 | 119.47 (15) | C43—C42—H42   | 119.5       |
| C19—C20—H20 | 120.3       | C44—C43—C42   | 121.17 (16) |
| C21—C20—H20 | 120.3       | C44—C43—H43   | 119.4       |
| C20—C21—C22 | 120.05 (14) | C42—C43—H43   | 119.4       |
| C20—C21—H21 | 120.0       | C43—C44—C45   | 117.75 (16) |
| C22—C21—H21 | 120.0       | C43—C44—H44   | 121.1       |
| C21—C22—C17 | 120.82 (14) | C45—C44—H44   | 121.1       |
| C21—C22—H22 | 119.6       | C44—C45—C40   | 121.53 (14) |
| C17—C22—H22 | 119.6       | C44—C45—S1    | 128.23 (13) |
| O1—C23—H23A | 109.5       | C40—C45—S1    | 110.21 (11) |

|                 |              |                 |              |
|-----------------|--------------|-----------------|--------------|
| O1—C23—H23B     | 109.5        |                 |              |
| C2—N1—C1—N2     | -0.14 (15)   | C5—C10—C17—C22  | 63.60 (16)   |
| C4—N1—C1—N2     | -174.17 (12) | C22—C17—C18—C19 | -0.1 (2)     |
| C2—N1—C1—Se1    | 179.36 (10)  | C10—C17—C18—C19 | 178.60 (14)  |
| C4—N1—C1—Se1    | 5.34 (19)    | C17—C18—C19—C20 | -0.7 (2)     |
| C39—N2—C1—N1    | -175.02 (12) | C18—C19—C20—C21 | 0.7 (2)      |
| C3—N2—C1—N1     | 0.65 (15)    | C19—C20—C21—C22 | 0.2 (2)      |
| C39—N2—C1—Se1   | 5.5 (2)      | C20—C21—C22—C17 | -1.0 (2)     |
| C3—N2—C1—Se1    | -178.82 (11) | C18—C17—C22—C21 | 1.0 (2)      |
| C1—N1—C2—C3     | -0.45 (16)   | C10—C17—C22—C21 | -177.80 (13) |
| C4—N1—C2—C3     | 173.52 (13)  | C8—C9—C24—C31   | 102.64 (15)  |
| C1—N1—C2—C37    | 178.32 (13)  | C4—C9—C24—C31   | -80.86 (15)  |
| C4—N1—C2—C37    | -7.7 (2)     | C8—C9—C24—C25   | -27.15 (18)  |
| N1—C2—C3—N2     | 0.82 (16)    | C4—C9—C24—C25   | 149.35 (13)  |
| C37—C2—C3—N2    | -177.84 (14) | C31—C24—C25—C30 | -3.9 (2)     |
| N1—C2—C3—C38    | -174.91 (16) | C9—C24—C25—C30  | 124.84 (15)  |
| C37—C2—C3—C38   | 6.4 (3)      | C31—C24—C25—C26 | 174.75 (13)  |
| C1—N2—C3—C2     | -0.94 (16)   | C9—C24—C25—C26  | -56.49 (17)  |
| C39—N2—C3—C2    | 174.82 (13)  | C30—C25—C26—C27 | -0.6 (2)     |
| C1—N2—C3—C38    | 174.83 (16)  | C24—C25—C26—C27 | -179.38 (14) |
| C39—N2—C3—C38   | -9.4 (2)     | C25—C26—C27—C28 | 0.8 (2)      |
| C1—N1—C4—C5     | 89.29 (17)   | C26—C27—C28—C29 | -0.1 (2)     |
| C2—N1—C4—C5     | -83.91 (17)  | C27—C28—C29—C30 | -0.6 (3)     |
| C1—N1—C4—C9     | -89.76 (16)  | C26—C25—C30—C29 | -0.1 (2)     |
| C2—N1—C4—C9     | 97.04 (16)   | C24—C25—C30—C29 | 178.57 (15)  |
| C9—C4—C5—C6     | -3.6 (2)     | C28—C29—C30—C25 | 0.7 (3)      |
| N1—C4—C5—C6     | 177.40 (12)  | C25—C24—C31—C32 | -100.24 (16) |
| C9—C4—C5—C10    | 173.89 (13)  | C9—C24—C31—C32  | 130.89 (14)  |
| N1—C4—C5—C10    | -5.13 (19)   | C25—C24—C31—C36 | 78.98 (18)   |
| C4—C5—C6—C7     | 0.3 (2)      | C9—C24—C31—C36  | -49.89 (18)  |
| C10—C5—C6—C7    | -177.17 (13) | C36—C31—C32—C33 | -0.2 (2)     |
| C23—O1—C7—C6    | -10.0 (2)    | C24—C31—C32—C33 | 179.05 (15)  |
| C23—O1—C7—C8    | 167.67 (14)  | C31—C32—C33—C34 | 0.1 (3)      |
| C5—C6—C7—O1     | 179.65 (13)  | C32—C33—C34—C35 | 0.0 (3)      |
| C5—C6—C7—C8     | 2.1 (2)      | C33—C34—C35—C36 | -0.1 (3)     |
| O1—C7—C8—C9     | -179.04 (13) | C32—C31—C36—C35 | 0.1 (2)      |
| C6—C7—C8—C9     | -1.3 (2)     | C24—C31—C36—C35 | -179.09 (14) |
| C7—C8—C9—C4     | -1.9 (2)     | C34—C35—C36—C31 | 0.0 (3)      |
| C7—C8—C9—C24    | 174.67 (13)  | C40—N3—C39—N2   | -179.08 (12) |
| C5—C4—C9—C8     | 4.3 (2)      | C40—N3—C39—S1   | 0.60 (16)    |
| N1—C4—C9—C8     | -176.63 (12) | C1—N2—C39—N3    | 173.13 (13)  |
| C5—C4—C9—C24    | -172.29 (13) | C3—N2—C39—N3    | -1.9 (2)     |
| N1—C4—C9—C24    | 6.73 (19)    | C1—N2—C39—S1    | -6.5 (2)     |
| C4—C5—C10—C11   | 86.23 (16)   | C3—N2—C39—S1    | 178.42 (11)  |
| C6—C5—C10—C11   | -96.35 (16)  | C45—S1—C39—N3   | -0.86 (12)   |
| C4—C5—C10—C17   | -145.89 (13) | C45—S1—C39—N2   | 178.81 (12)  |
| C6—C5—C10—C17   | 31.53 (18)   | C39—N3—C40—C45  | 0.09 (18)    |
| C17—C10—C11—C16 | -84.34 (17)  | C39—N3—C40—C41  | 179.42 (15)  |

|                 |              |                 |              |
|-----------------|--------------|-----------------|--------------|
| C5—C10—C11—C16  | 42.1 (2)     | N3—C40—C41—C42  | -177.42 (15) |
| C17—C10—C11—C12 | 93.35 (17)   | C45—C40—C41—C42 | 1.9 (2)      |
| C5—C10—C11—C12  | -140.20 (14) | C40—C41—C42—C43 | -0.7 (3)     |
| C16—C11—C12—C13 | 1.4 (2)      | C41—C42—C43—C44 | -0.6 (3)     |
| C10—C11—C12—C13 | -176.34 (15) | C42—C43—C44—C45 | 0.6 (3)      |
| C11—C12—C13—C14 | -0.9 (3)     | C43—C44—C45—C40 | 0.6 (2)      |
| C12—C13—C14—C15 | -0.6 (3)     | C43—C44—C45—S1  | 178.46 (13)  |
| C13—C14—C15—C16 | 1.4 (3)      | N3—C40—C45—C44  | 177.53 (14)  |
| C12—C11—C16—C15 | -0.6 (2)     | C41—C40—C45—C44 | -1.8 (2)     |
| C10—C11—C16—C15 | 177.12 (15)  | N3—C40—C45—S1   | -0.71 (17)   |
| C14—C15—C16—C11 | -0.8 (3)     | C41—C40—C45—S1  | 179.92 (12)  |
| C11—C10—C17—C18 | 12.61 (19)   | C39—S1—C45—C44  | -177.27 (15) |
| C5—C10—C17—C18  | -115.11 (15) | C39—S1—C45—C40  | 0.82 (11)    |
| C11—C10—C17—C22 | -168.68 (13) |                 |              |

### Full information from Platon program (version 2021.2) using SQUEEZE option

4amask.log

Miller array info: C:\Users\Blazej\Desktop\CIFY GOTOWE\B128\_a.hkl:Iobs,SigIobs

Observation type: xray.intensity

Type of data: double, size=19523

Type of sigmas: double, size=19523

Number of Miller indices: 19523

Anomalous flag: False

Unit cell: (10.6849, 32.0913, 12.6278, 90, 104.579, 90)

Space group: P 1 21/c 1 (No. 14)

Systematic absences: 234

Systematic absences not included in following:

Centric reflections: 19289

Resolution range: 11.421 0.771579

use\_set\_completion: True

solvent\_radius: 1.20

shrink\_truncation\_radius: 1.20

van der Waals radii:

Ag C Cl H N S

1.72 1.70 1.75 1.09 1.55 1.80

Total solvent accessible volume / cell = 672.1 Ang<sup>3</sup> [16.0%]

Total electron count / cell = 169.6

gridding: (60,180,72)

Void #Grid points Vol/A<sup>3</sup> Vol/% Centre of mass (frac) Eigenvectors (frac)

1 52871 284.9 6.8 (-0.000,-0.000, 0.000) 1 ( 0.705,-0.093, 0.703)

2 (-0.701, 0.059, 0.711)

3 ( 0.108, 0.994, 0.024)

2 52871 284.9 6.8 (-0.000, 0.500, 0.500) 1 ( 0.705, 0.093, 0.703)

2 (-0.701,-0.059, 0.711)

3 (-0.108, 0.994,-0.024)

3 3040 16.4 0.4 ( 0.232, 0.089, 0.576) 1 ( 0.741,-0.049, 0.669)

|    |      |      |     |                          |                          |
|----|------|------|-----|--------------------------|--------------------------|
|    |      |      |     | 2 (-0.656, 0.156, 0.738) |                          |
|    |      |      |     | 3 ( 0.140, 0.987,-0.084) |                          |
| 4  | 3040 | 16.4 | 0.4 | ( 0.232, 0.411, 0.076)   | 1 ( 0.741, 0.049, 0.669) |
|    |      |      |     | 2 (-0.656,-0.156, 0.738) |                          |
|    |      |      |     | 3 (-0.140, 0.987, 0.084) |                          |
| 5  | 1702 | 9.2  | 0.2 | ( 0.217, 0.650, 0.951)   | 1 ( 0.901, 0.009, 0.434) |
|    |      |      |     | 2 (-0.434, 0.040, 0.900) |                          |
|    |      |      |     | 3 ( 0.009, 0.999,-0.040) |                          |
| 6  | 1702 | 9.2  | 0.2 | ( 0.217, 0.850, 0.451)   | 1 ( 0.901,-0.009, 0.434) |
|    |      |      |     | 2 (-0.434,-0.040, 0.900) |                          |
|    |      |      |     | 3 (-0.009, 0.999, 0.040) |                          |
| 7  | 3040 | 16.4 | 0.4 | ( 0.768, 0.589, 0.924)   | 1 ( 0.741, 0.049, 0.669) |
|    |      |      |     | 2 (-0.656,-0.156, 0.738) |                          |
|    |      |      |     | 3 (-0.140, 0.987, 0.084) |                          |
| 8  | 3040 | 16.4 | 0.4 | ( 0.768, 0.911, 0.424)   | 1 ( 0.741,-0.049, 0.669) |
|    |      |      |     | 2 (-0.656, 0.156, 0.738) |                          |
|    |      |      |     | 3 ( 0.140, 0.987,-0.084) |                          |
| 9  | 1702 | 9.2  | 0.2 | ( 0.783, 0.150, 0.549)   | 1 ( 0.901,-0.009, 0.434) |
|    |      |      |     | 2 (-0.434,-0.040, 0.900) |                          |
|    |      |      |     | 3 (-0.009, 0.999, 0.040) |                          |
| 10 | 1702 | 9.2  | 0.2 | ( 0.783, 0.350, 0.049)   | 1 ( 0.901, 0.009, 0.434) |
|    |      |      |     | 2 (-0.434, 0.040, 0.900) |                          |
|    |      |      |     | 3 ( 0.009, 0.999,-0.040) |                          |

Void Vol/Ang<sup>3</sup> #Electrons

|    |       |      |
|----|-------|------|
| 1  | 284.9 | 84.8 |
| 2  | 284.9 | 84.8 |
| 3  | 16.4  | 0.0  |
| 4  | 16.4  | 0.0  |
| 5  | 9.2   | 0.0  |
| 6  | 9.2   | 0.0  |
| 7  | 16.4  | 0.0  |
| 8  | 16.4  | 0.0  |
| 9  | 9.2   | 0.0  |
| 10 | 9.2   | 0.0  |

5bmask.log

Miller array info: C:\Users\Blazej\Desktop\CIFY GOTOWE\PdBenzotiazol\_auto\_a.hkl:Iobs,SigIobs

Observation type: xray.intensity

Type of data: double, size=36247

Type of sigmas: double, size=36247

Number of Miller indices: 36247

Anomalous flag: False

Unit cell: (25.3287, 9.4913, 35.0477, 90, 90, 90)

Space group: P b c a (No. 61)

Systematic absences: 2471

Systematic absences not included in following:

Centric reflections: 33776

Resolution range: 17.5238 0.805477

use\_set\_completion: True

solvent\_radius: 1.20

shrink\_truncation\_radius: 1.20

van der Waals radii:

|      |      |      |      |      |      |      |
|------|------|------|------|------|------|------|
| C    | Cl   | H    | N    | O    | Pd   | S    |
| 1.70 | 1.75 | 1.09 | 1.55 | 1.52 | 1.63 | 1.80 |

Total solvent accessible volume / cell = 1347.5 Ang<sup>3</sup> [16.0%]

Total electron count / cell = 439.2

gridding: (128,48,180)

Void #Grid points Vol/A<sup>3</sup> Vol/% Centre of mass (frac) Eigenvectors (frac)

|   |       |       |     |                        |                          |
|---|-------|-------|-----|------------------------|--------------------------|
| 1 | 88438 | 673.8 | 8.0 | (-0.997,-0.049,-0.000) | 1 (-0.079, 0.086, 0.993) |
|   |       |       |     |                        | 2 (-0.576, 0.809,-0.115) |
|   |       |       |     |                        | 3 ( 0.814, 0.581, 0.015) |
| 2 | 88438 | 673.8 | 8.0 | (-0.104,-0.819, 0.500) | 1 (-0.365, 0.775, 0.516) |
|   |       |       |     |                        | 2 ( 0.181,-0.485, 0.856) |
|   |       |       |     |                        | 3 ( 0.913, 0.406, 0.036) |

Void Vol/Ang<sup>3</sup> #Electrons

|   |       |       |
|---|-------|-------|
| 1 | 673.8 | 219.6 |
| 2 | 673.8 | 219.6 |

## Computational Methods

**Computational Methods.** All of the calculations were performed using Gaussian 09 suite of programs. All of the geometry optimizations were performed at the B3LYP level of theory in the gas phase with the 6-311++G(d,p) basis set. For geometry optimizations, we employed the X-ray structures of 1-(benzo[*d*]thiazol-2-yl)-3-(2,6-dibenzhydryl-4-methylphenyl)-4,5-dimethyl-1*H*-imidazol-3-ium or its linear metal complexes as the starting geometry and performed full optimization. The absence of imaginary frequencies was used to characterize the structures as minima on the potential energy surface. All of the optimized geometries were verified as minima (no imaginary frequencies). Energetic parameters were calculated under standard conditions (298.15 K and 1 atm). Structural representations were generated using CYLview software (Legault, C. Y. CYLview version 1.0 BETA, University of Sherbrooke). All other representations were generated using GaussView (GaussView, version 5, Dennington, R.; Keith, T.; Millam, J. Semicem Inc., Shawnee Mission, KS, 2009) or ChemCraft software (Andrienko, G. L. ChemCraft version b562a, <https://www.chemcraftprog.com>).

## Full Reference for Gaussian 09

Gaussian 09, Revision D.01, Frisch, M. J.; Trucks, G. W.; Schlegel, H. B.; Scuseria, G. E.; Robb, M. A.; Cheeseman, J. R.; Scalmani, G.; Barone, V.; Mennucci, B.; Petersson, G. A.; Nakatsuji, H.; Caricato, M.; Li, X.; Hratchian, H. P.; Izmaylov, A. F.; Bloino, J.; Zheng, G.; Sonnenberg, J. L.; Hada, M.; Ehara, M.; Toyota, K.; Fukuda, R.; Hasegawa, J.; Ishida, M.; Nakajima, T.; Honda, Y.; Kitao, O.; Nakai, H.; Vreven, T.; Montgomery, J. A., Jr.; Peralta, J. E.; Ogliaro, F.; Bearpark, M.; Heyd, J. J.; Brothers, E.; Kudin, K. N.; Staroverov, V. N.; Kobayashi, R.; Normand, J.; Raghavachari, K.; Rendell, A.; Burant, J. C.; Iyengar, S. S.; Tomasi, J.; Cossi, M.; Rega, N.; Millam, M. J.; Klene, M.; Knox, J. E.; Cross, J. B.; Bakken, V.; Adamo, C.; Jaramillo, J.; Gomperts, R.; Stratmann, R. E.; Yazyev, O.; Austin, A. J.; Cammi, R.; Pomelli, C.; Ochterski, J. W.; Martin, R. L.; Morokuma, K.; Zakrzewski, V. G.; Voth, G. A.; Salvador, P.; Dannenberg, J. J.; Dapprich, S.; Daniels, A. D.; Farkas, Ö.; Foresman, J. B.; Ortiz, J. V.; Cioslowski, J.; Fox, D. J. Gaussian, Inc., Wallingford CT, 2009.

**1a** 2,6-Dibenzhydryl-4-methylaniline

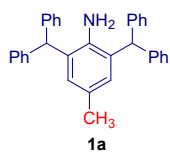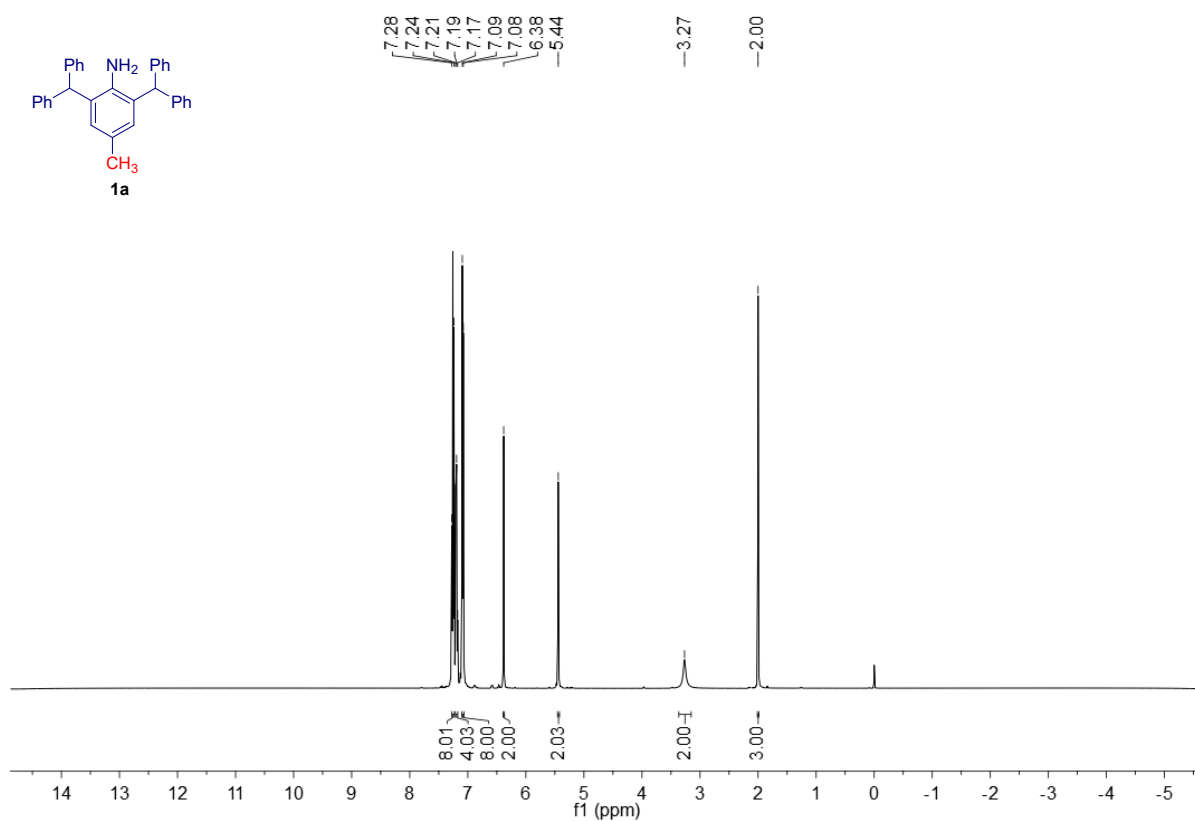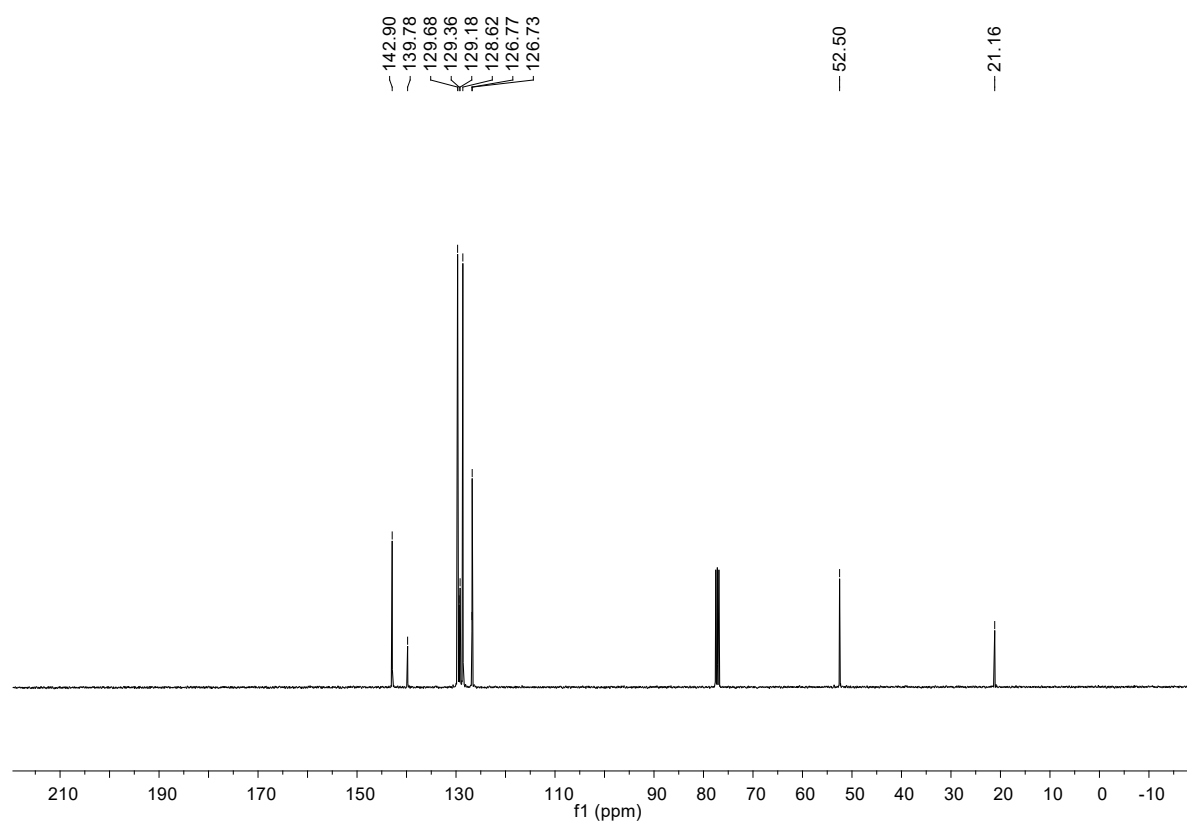

**1b** 4-Methoxy-2,6-bis(diphenylmethyl)aniline

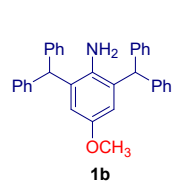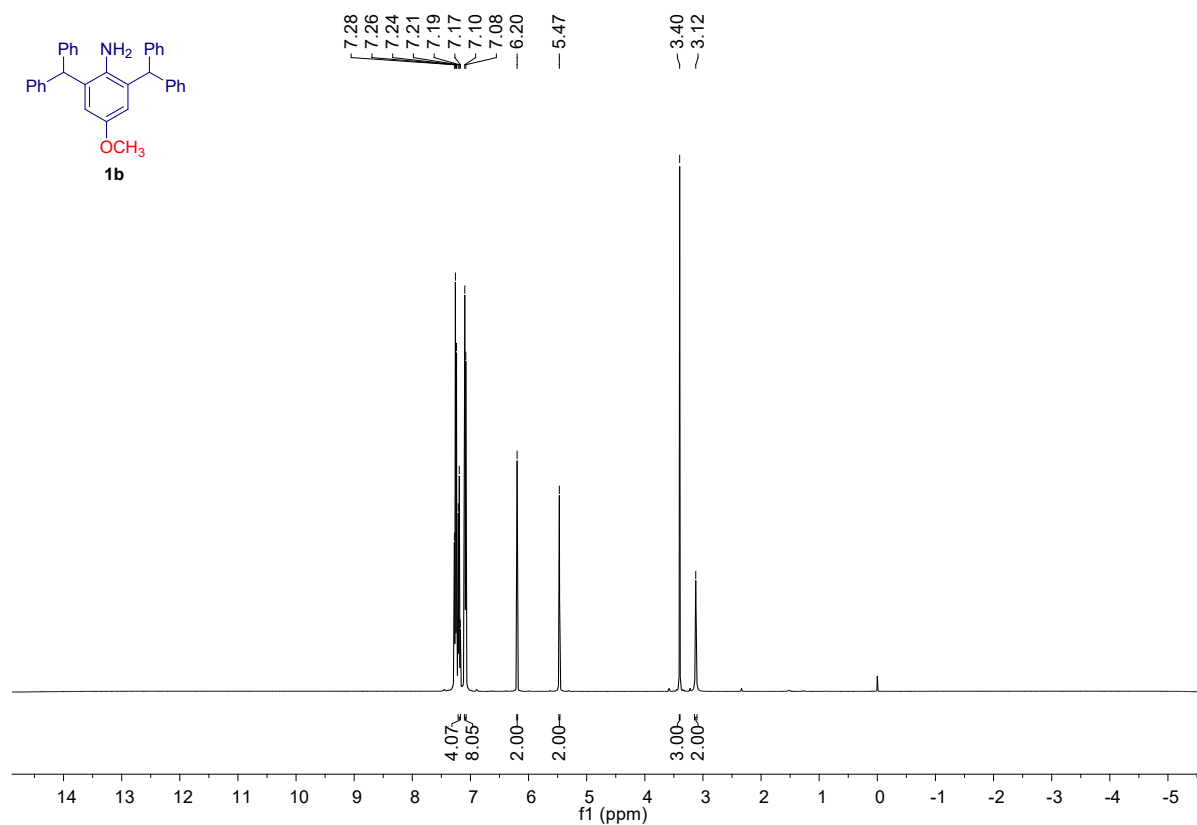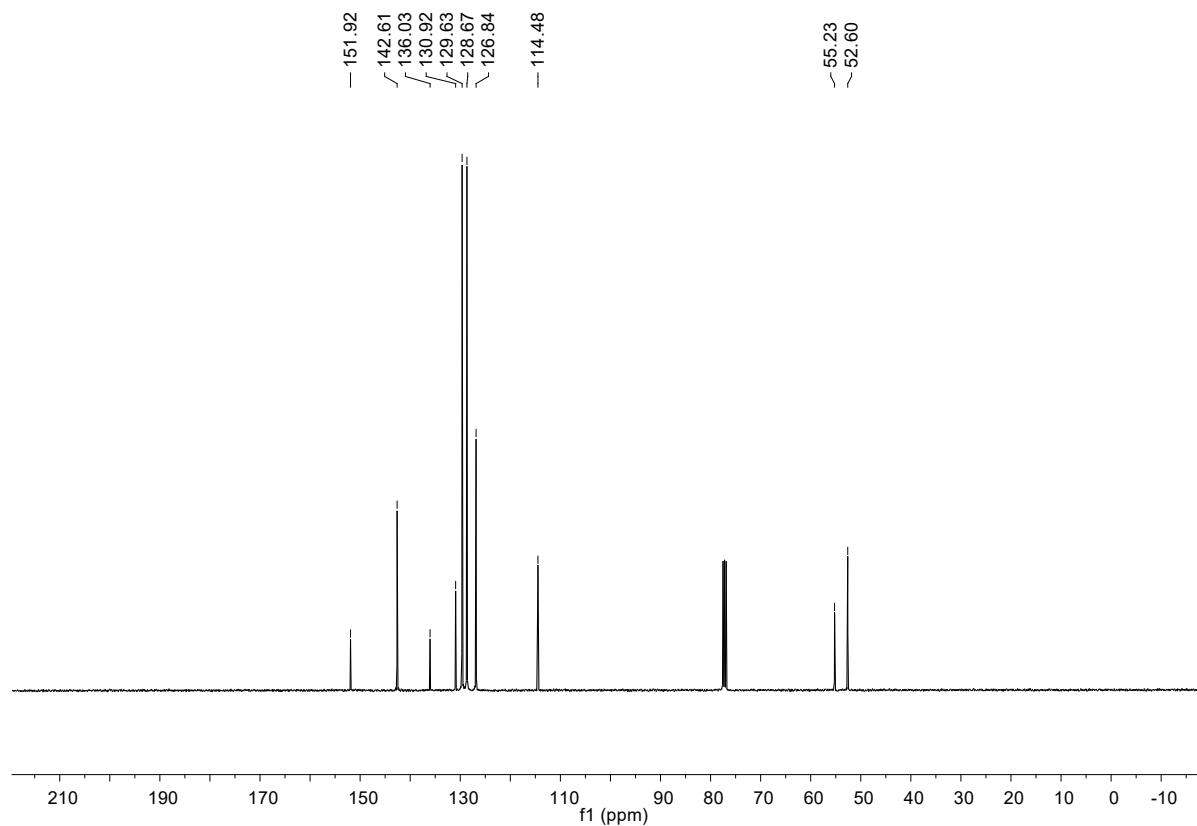



**2a** 1-(2,6-Dibenzhydryl-4-methylphenyl)-4,5-dimethyl-1H-imidazole

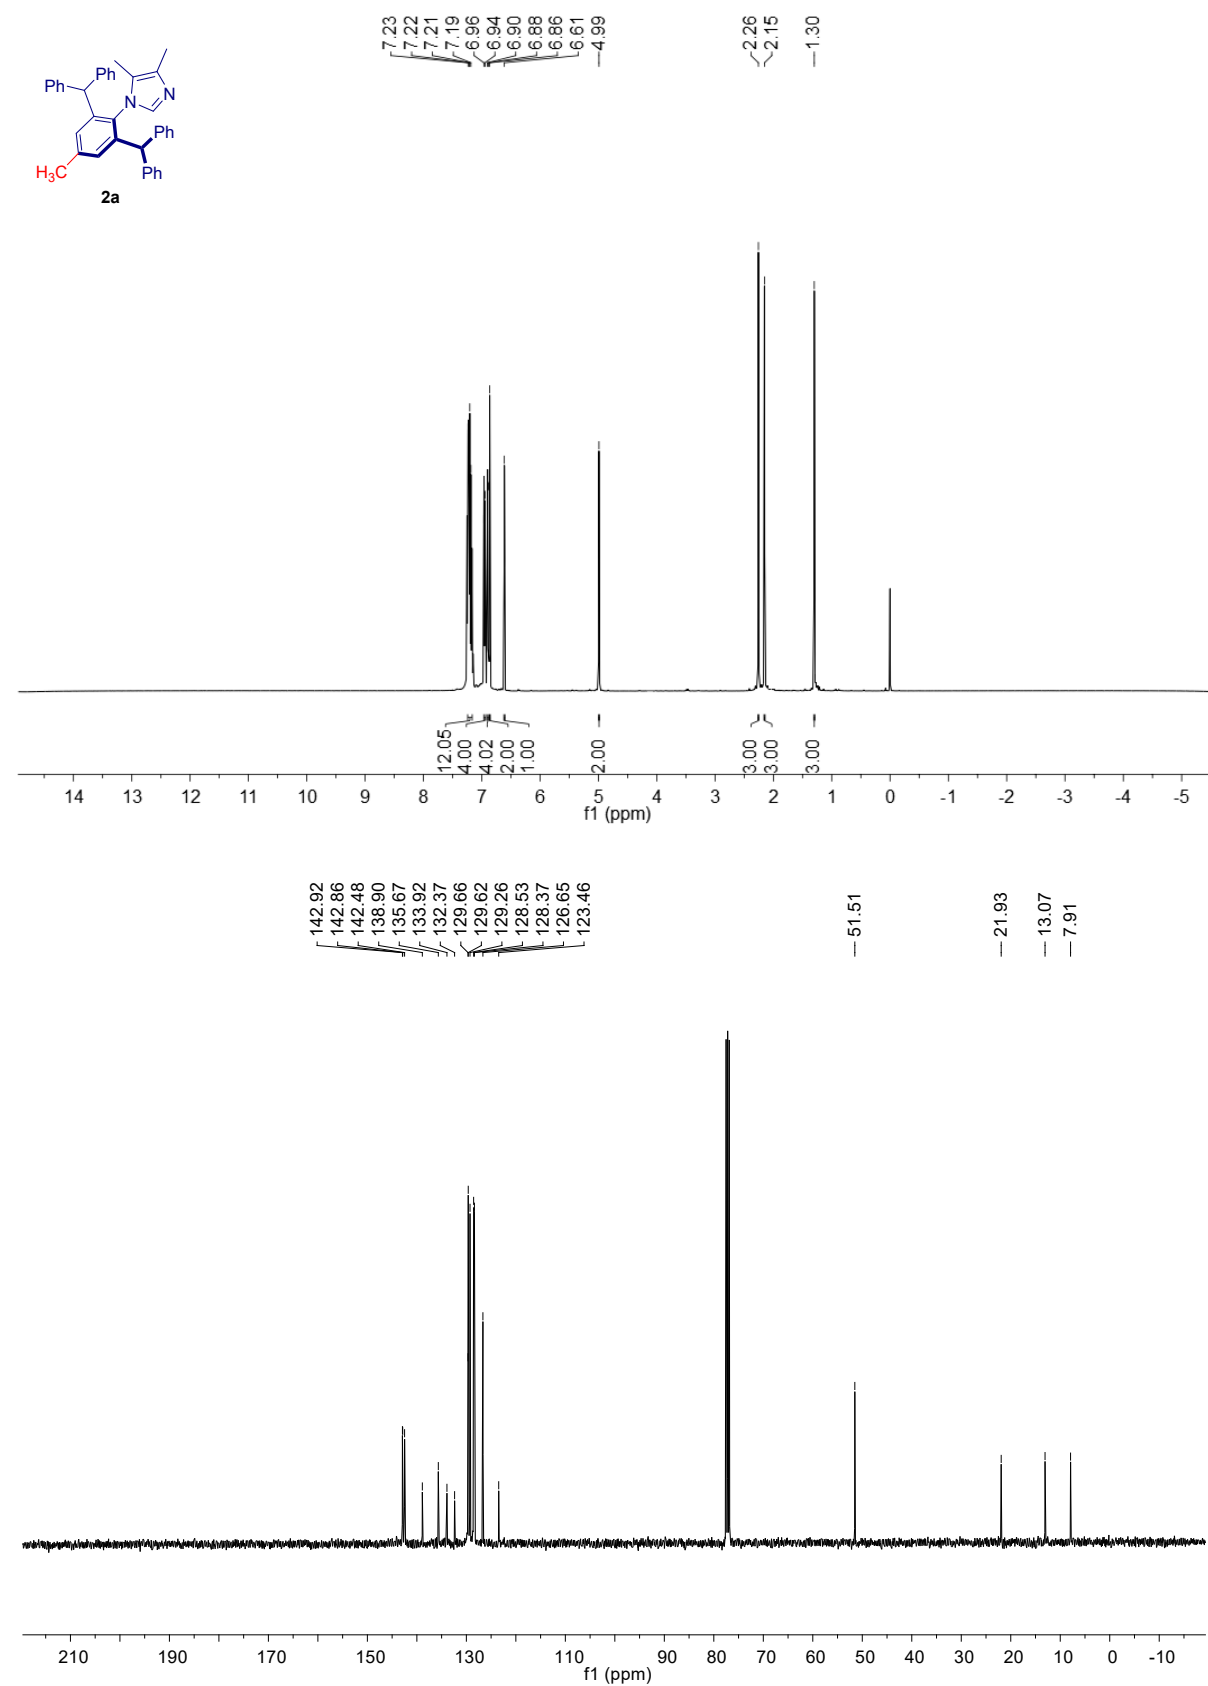

**2b** 1-(2,6-Dibenzhydryl-4-methoxyphenyl)-4,5-dimethyl-1H-imidazole

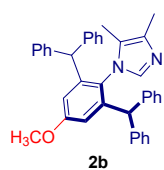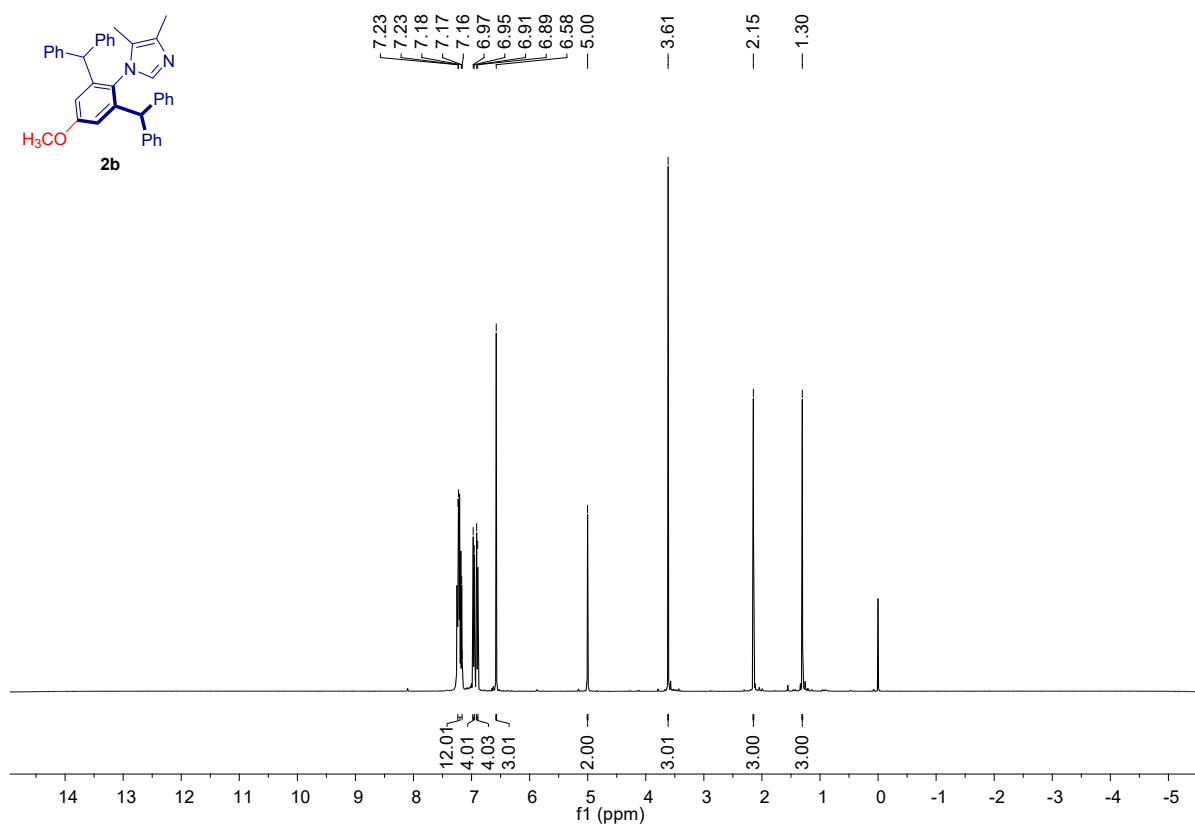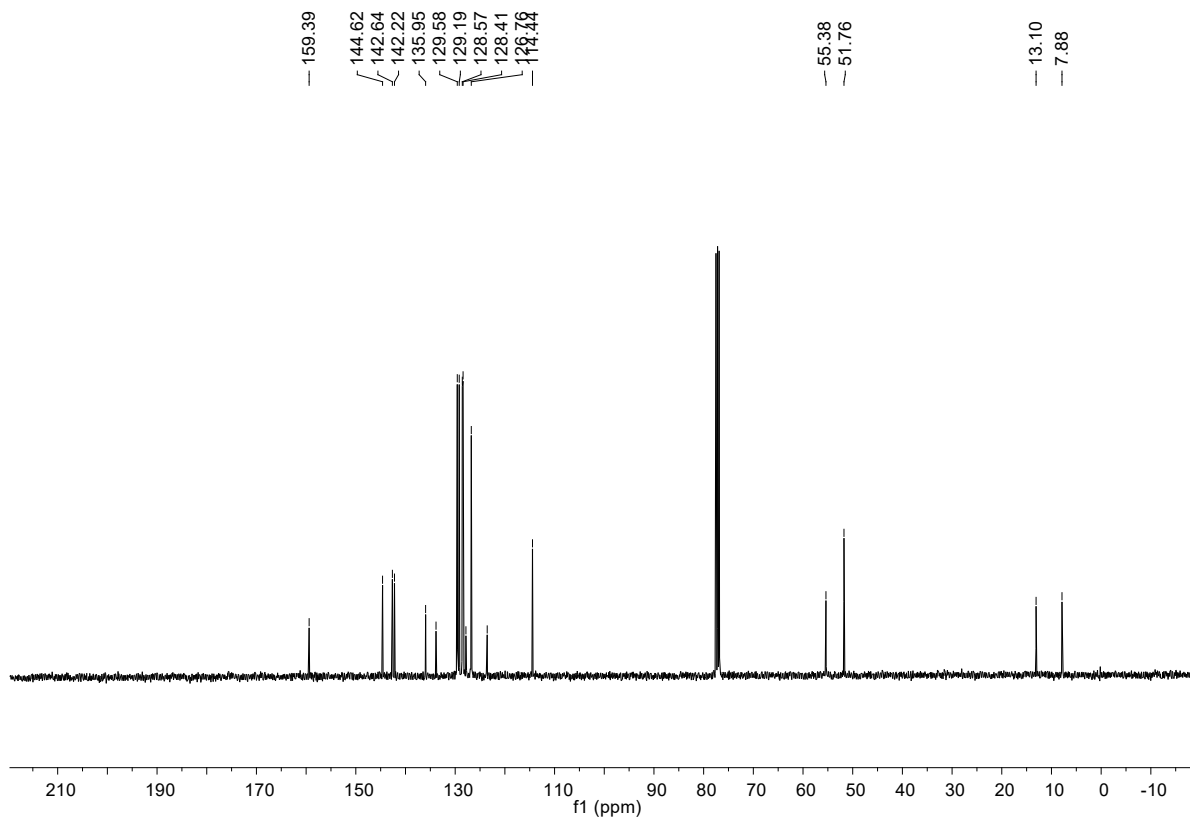

**3a** 1-(Benzo[d]thiazole-3-(2,6-dibenzhydryl-4-methylphenyl)-4,5-dimethyl-1*H*-imidazol-3-ium chloride

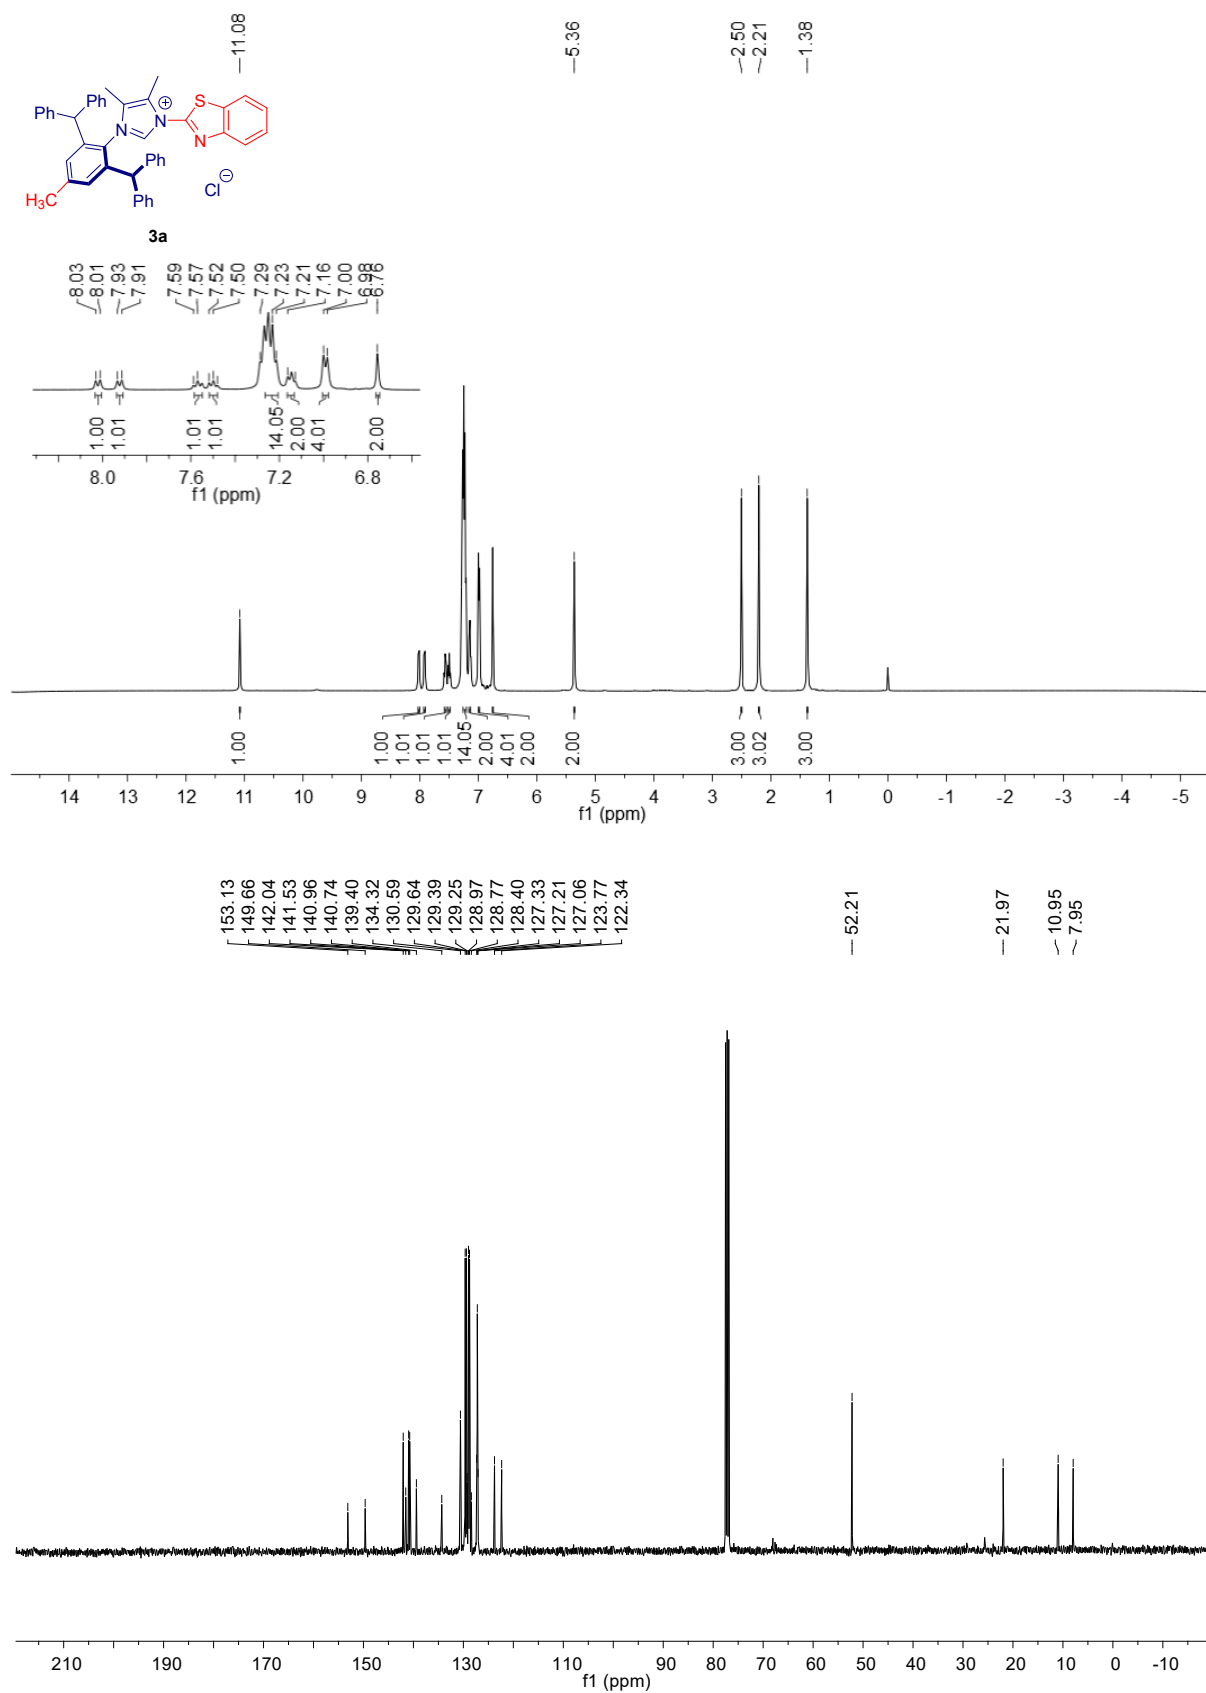

**3b** 1-(Benzo[*d*]thiazole-3-(2,6-dibenzhydryl-4-methoxyphenyl)-4,5-dimethyl-1*H*-imidazol-3-ium chloride

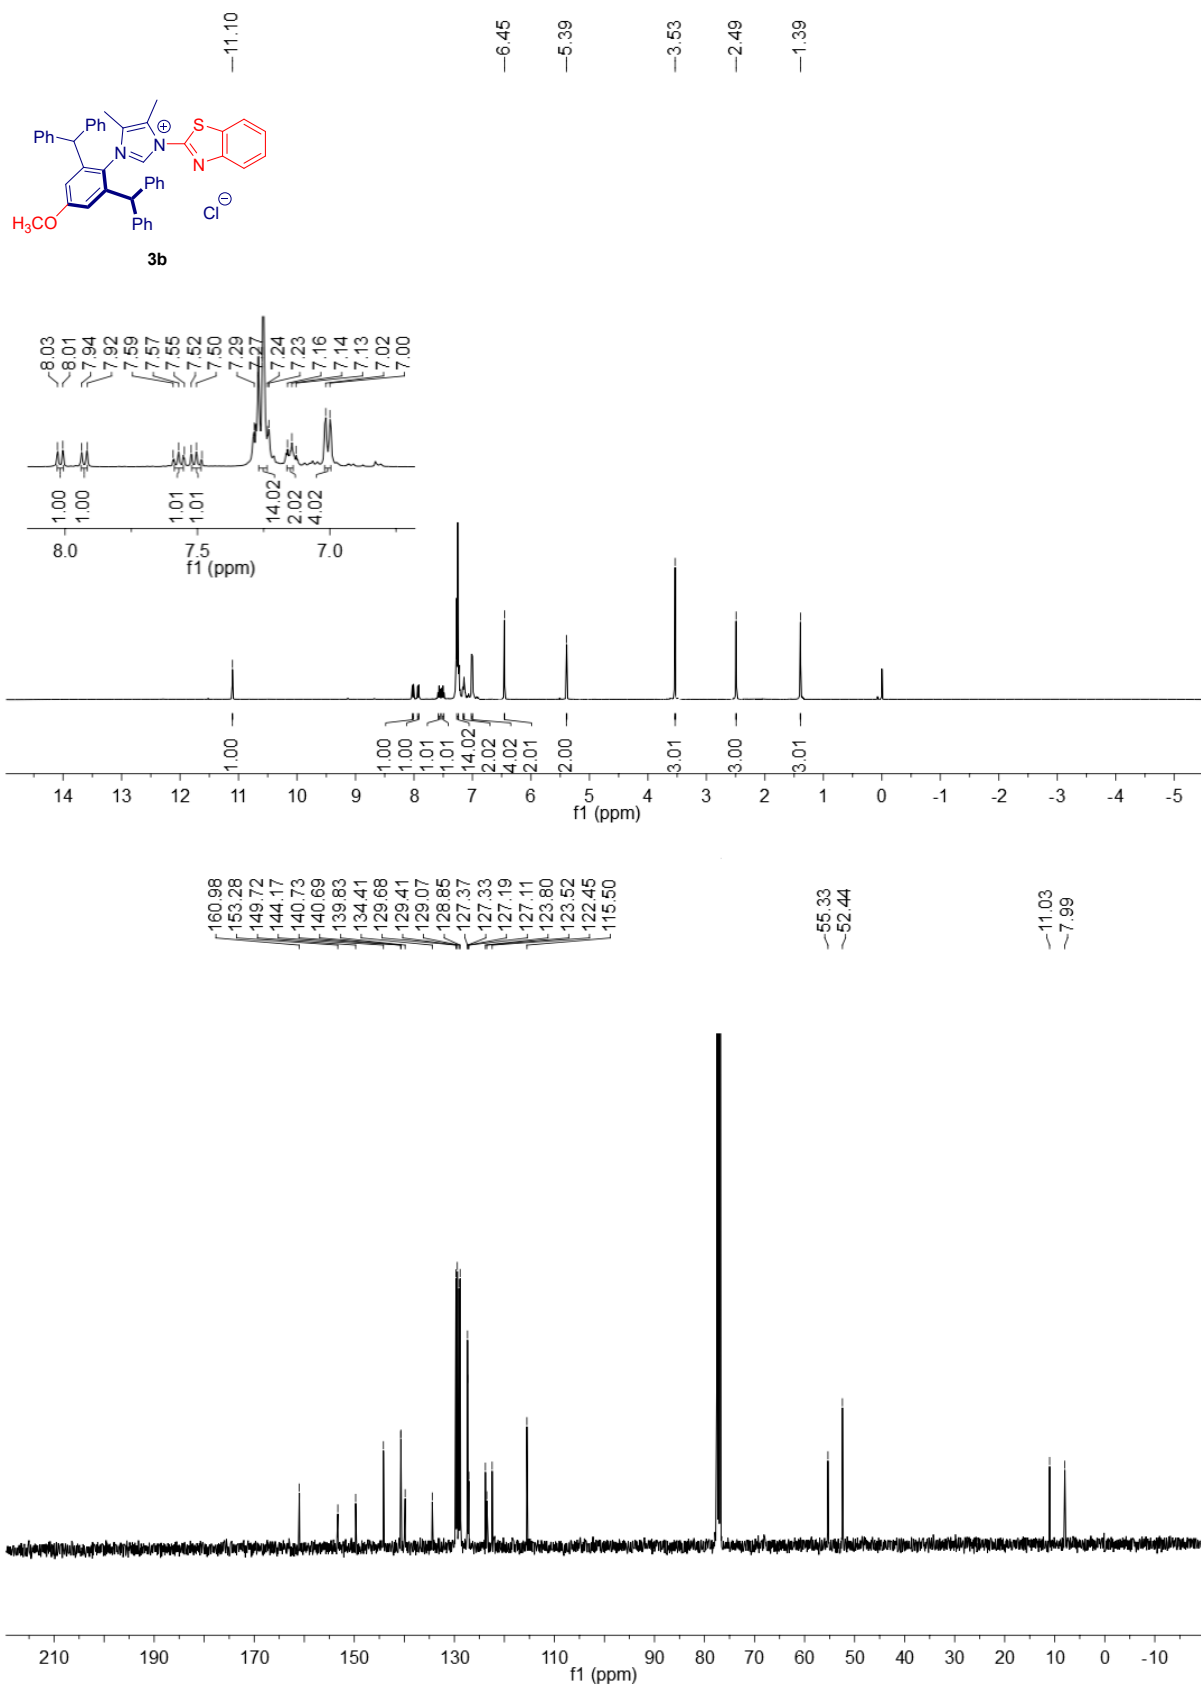

**3c** 6-Chloro-1-(Benzothiazol-2-yl)-3-(2,6-dibenzhydryl-4-methylphenyl)-4,5-dimethyl-1*H*-imidazol-3-ium chloride

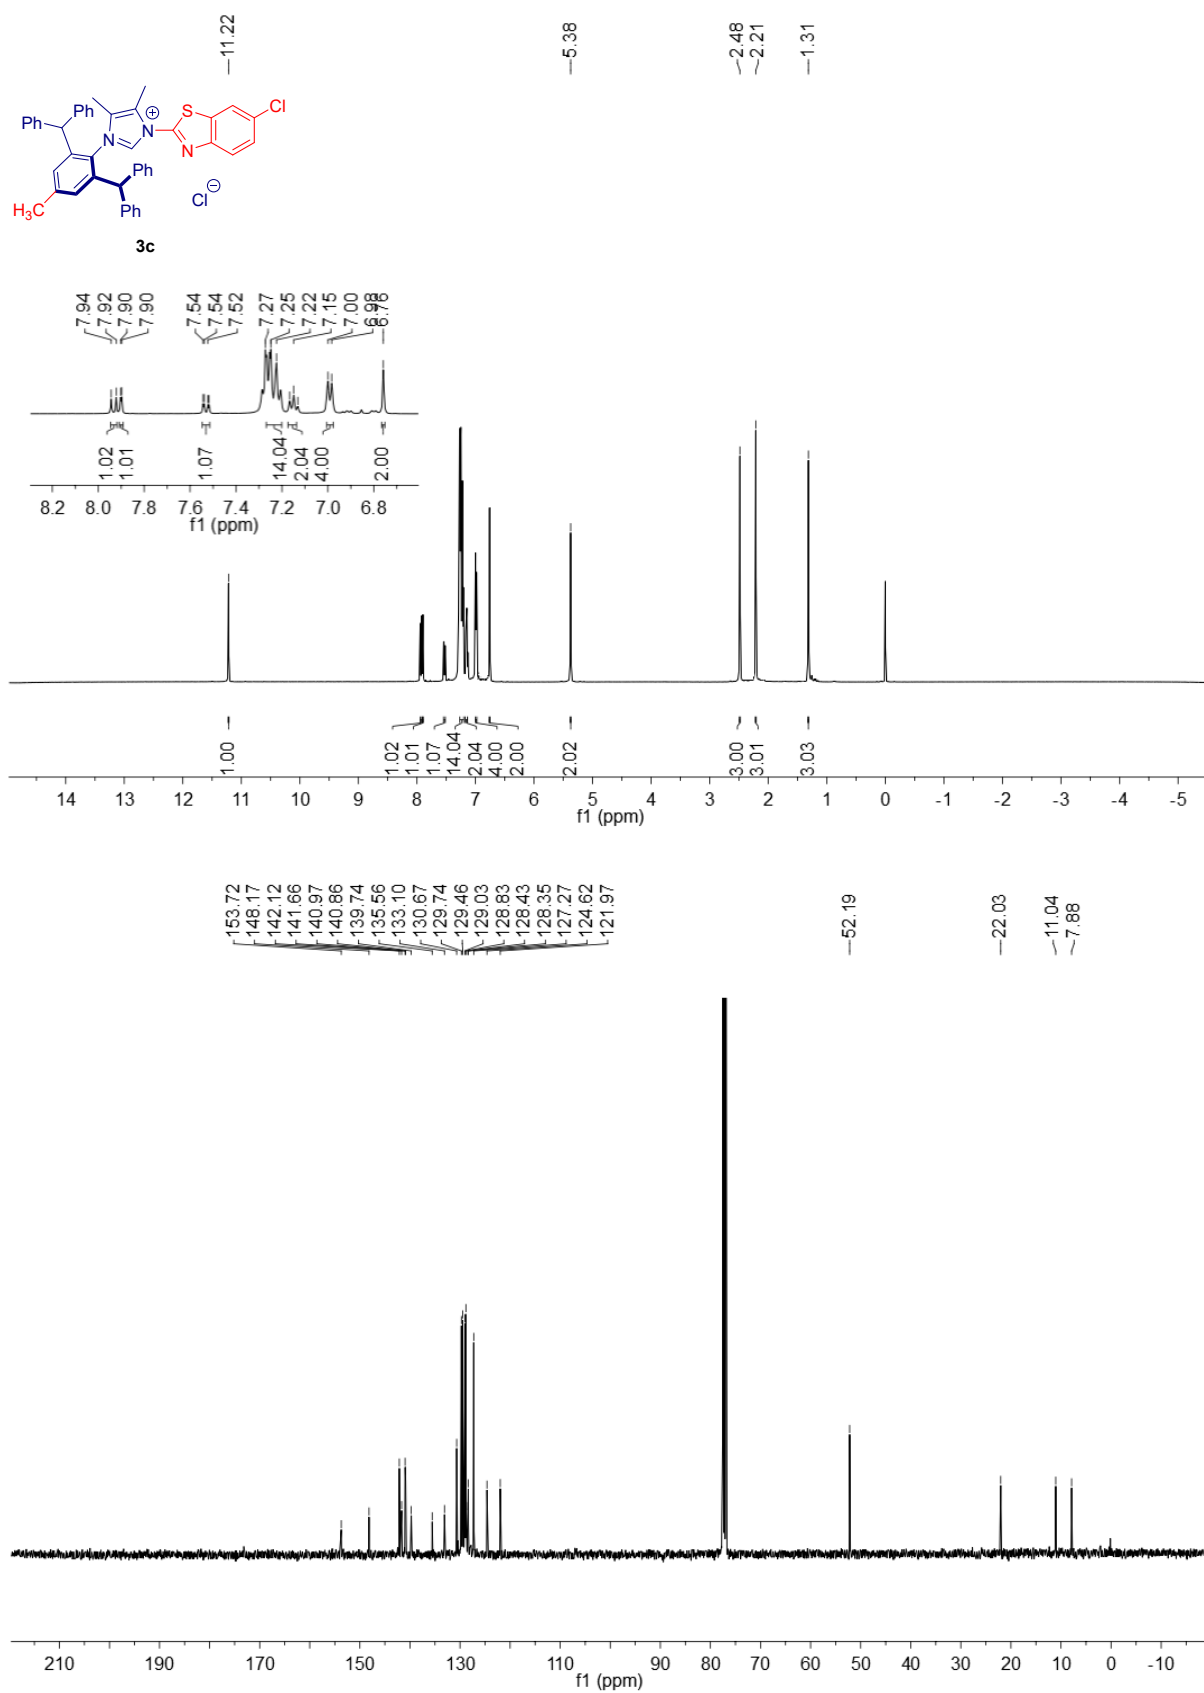

**3d** 6-Bromo-1-(Benzothiazol-2-yl)-3-(2,6-dibenzhydryl-4-methylphenyl)-4,5-dimethyl-1*H*-imidazol-3-ium chloride

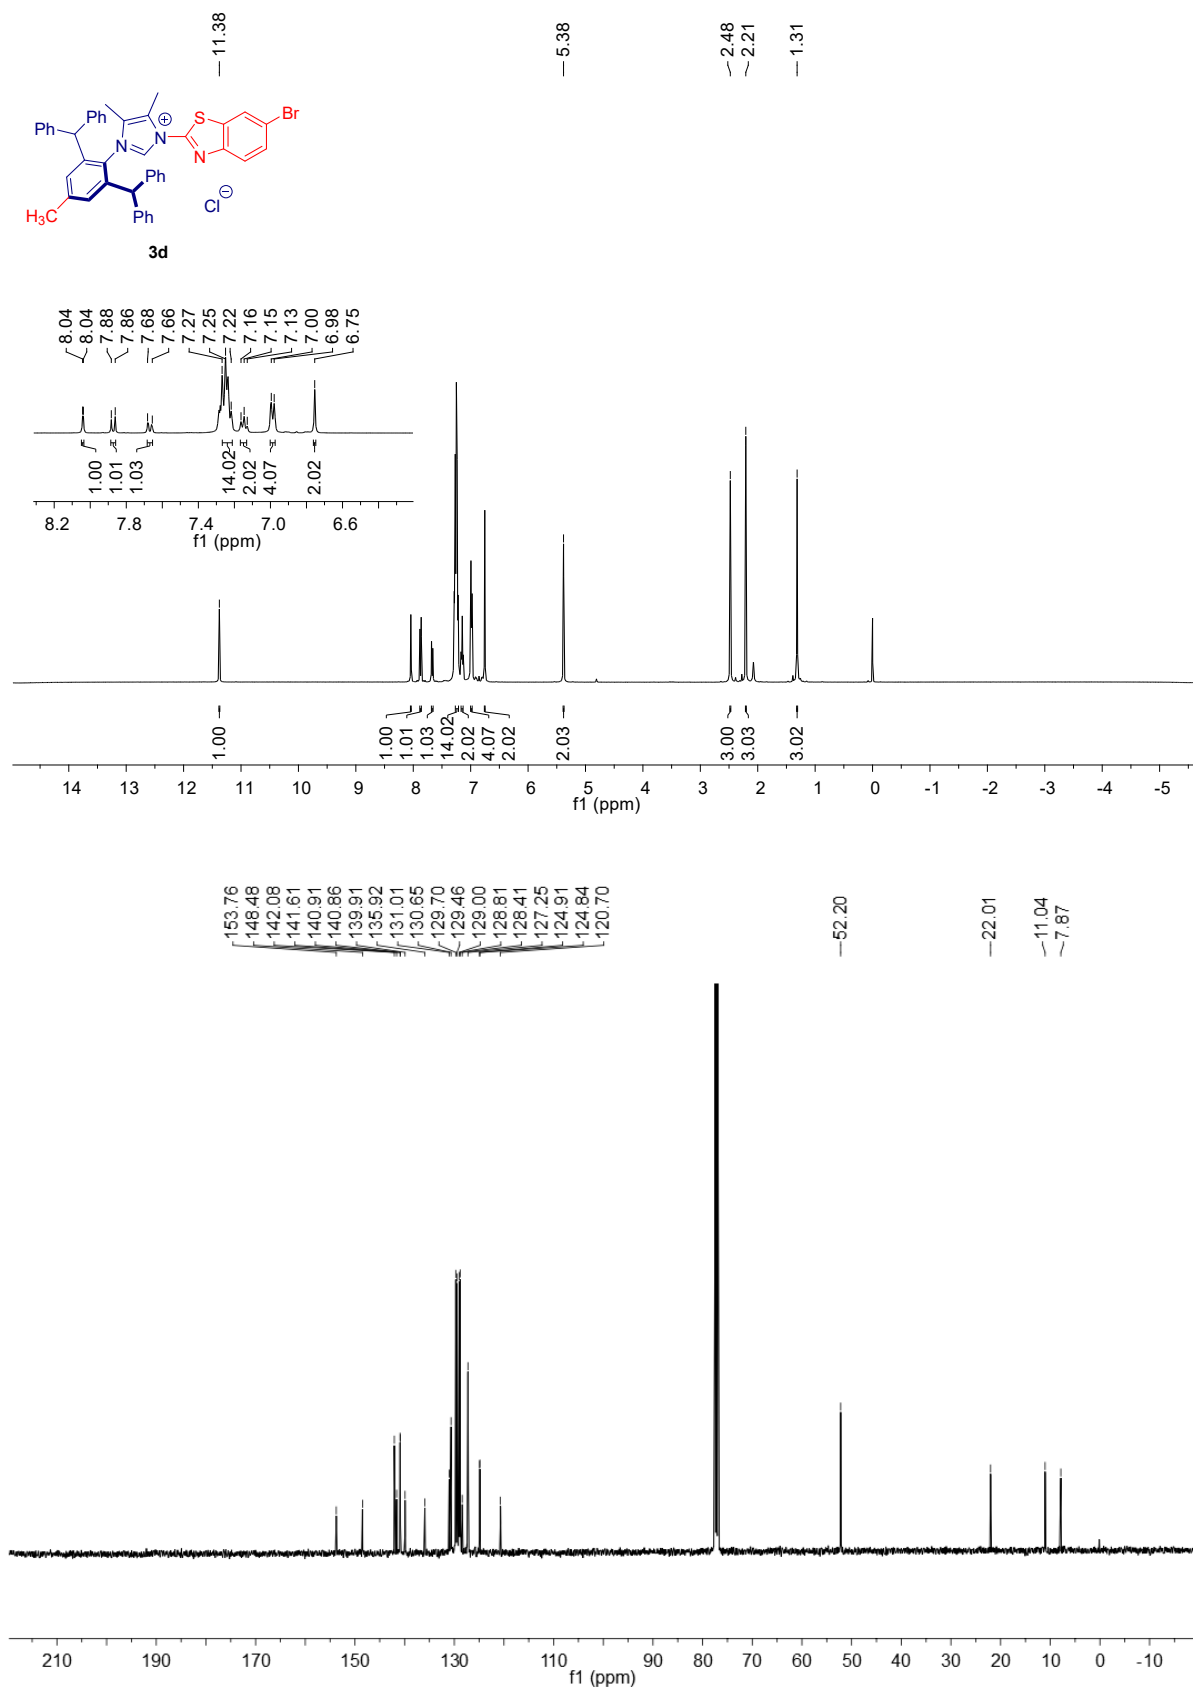

**3e** 6-(Oxidaneyl)diazenyl-1-(Benzothiazol-2-yl)-3-(2,6-dibenzhydryl-4-methylphenyl)-4,5-dimethyl-1*H*-imidazol-3-ium chloride

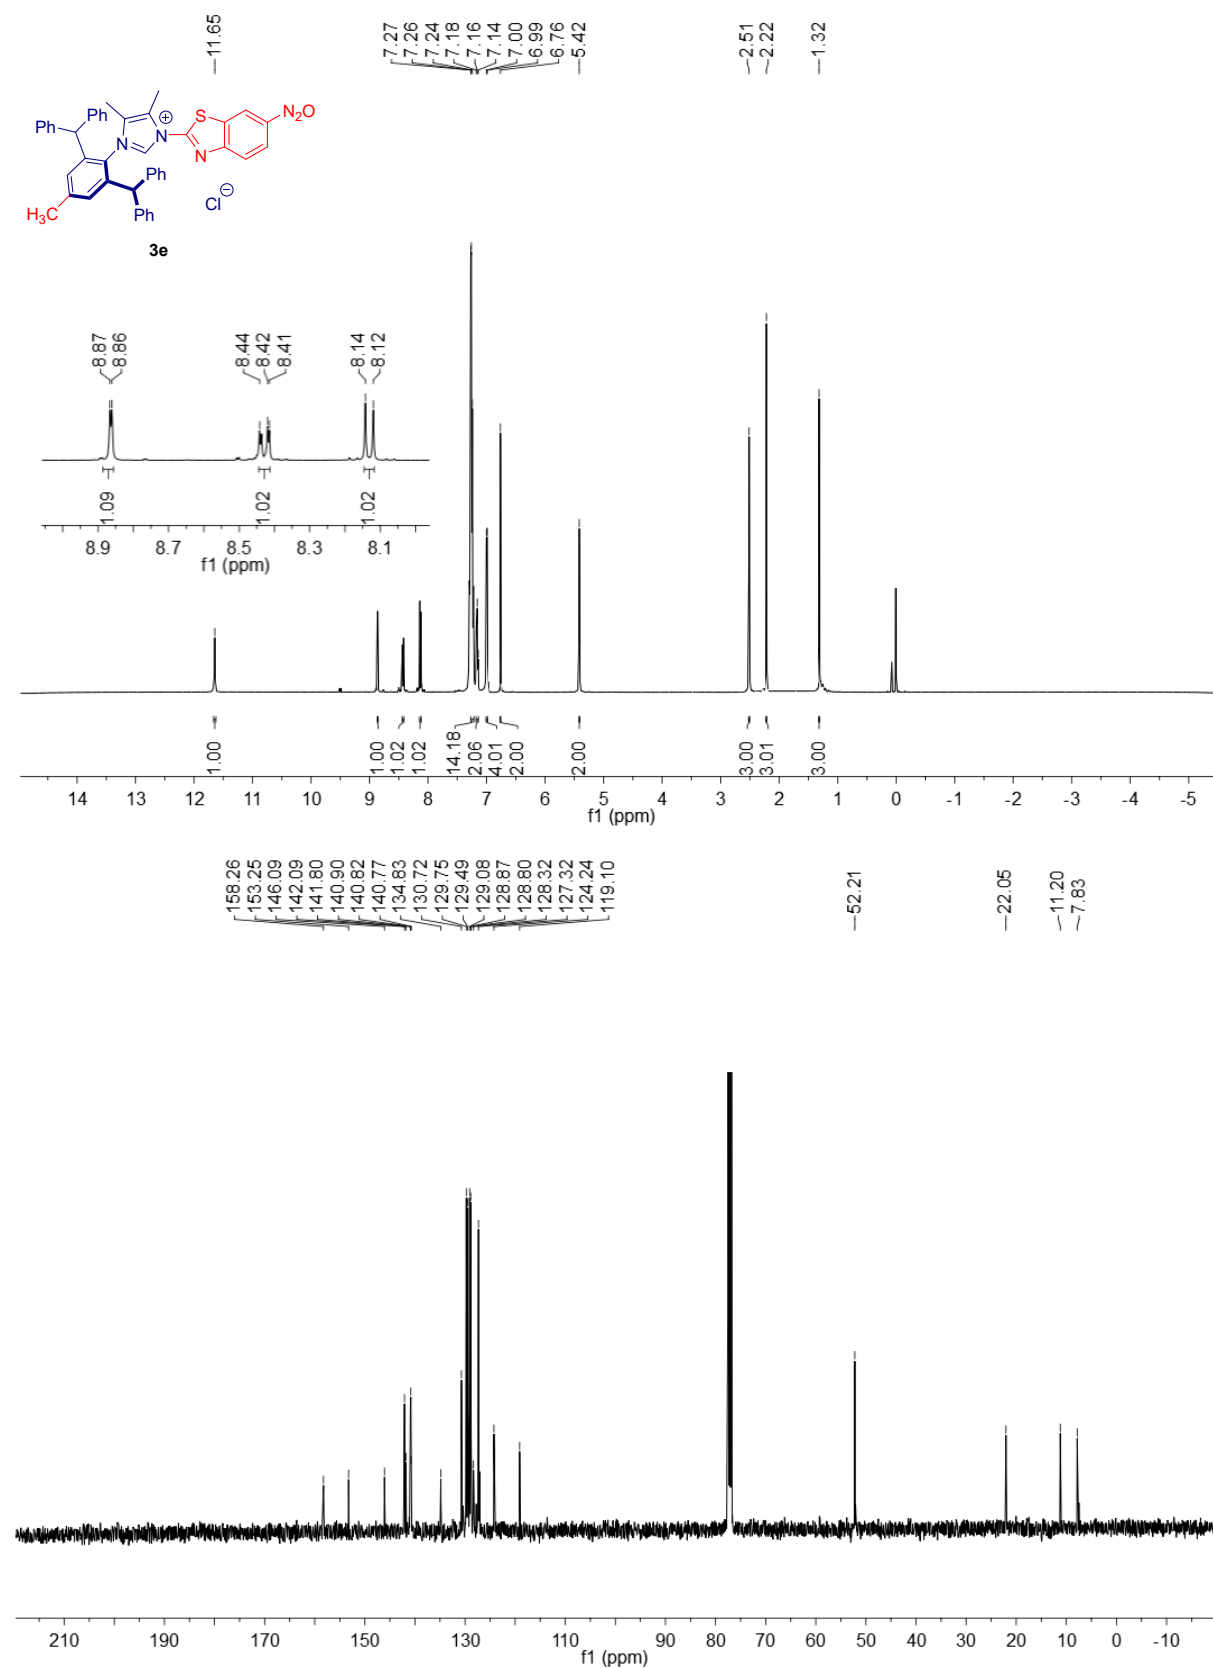

**3f** 5-Carbonitrile-1-(thiazol-2-yl)-3-(2,6-dibenzhydryl-4-methylphenyl)-4,5-dimethyl-1*H*-imidazol-3-ium chloride

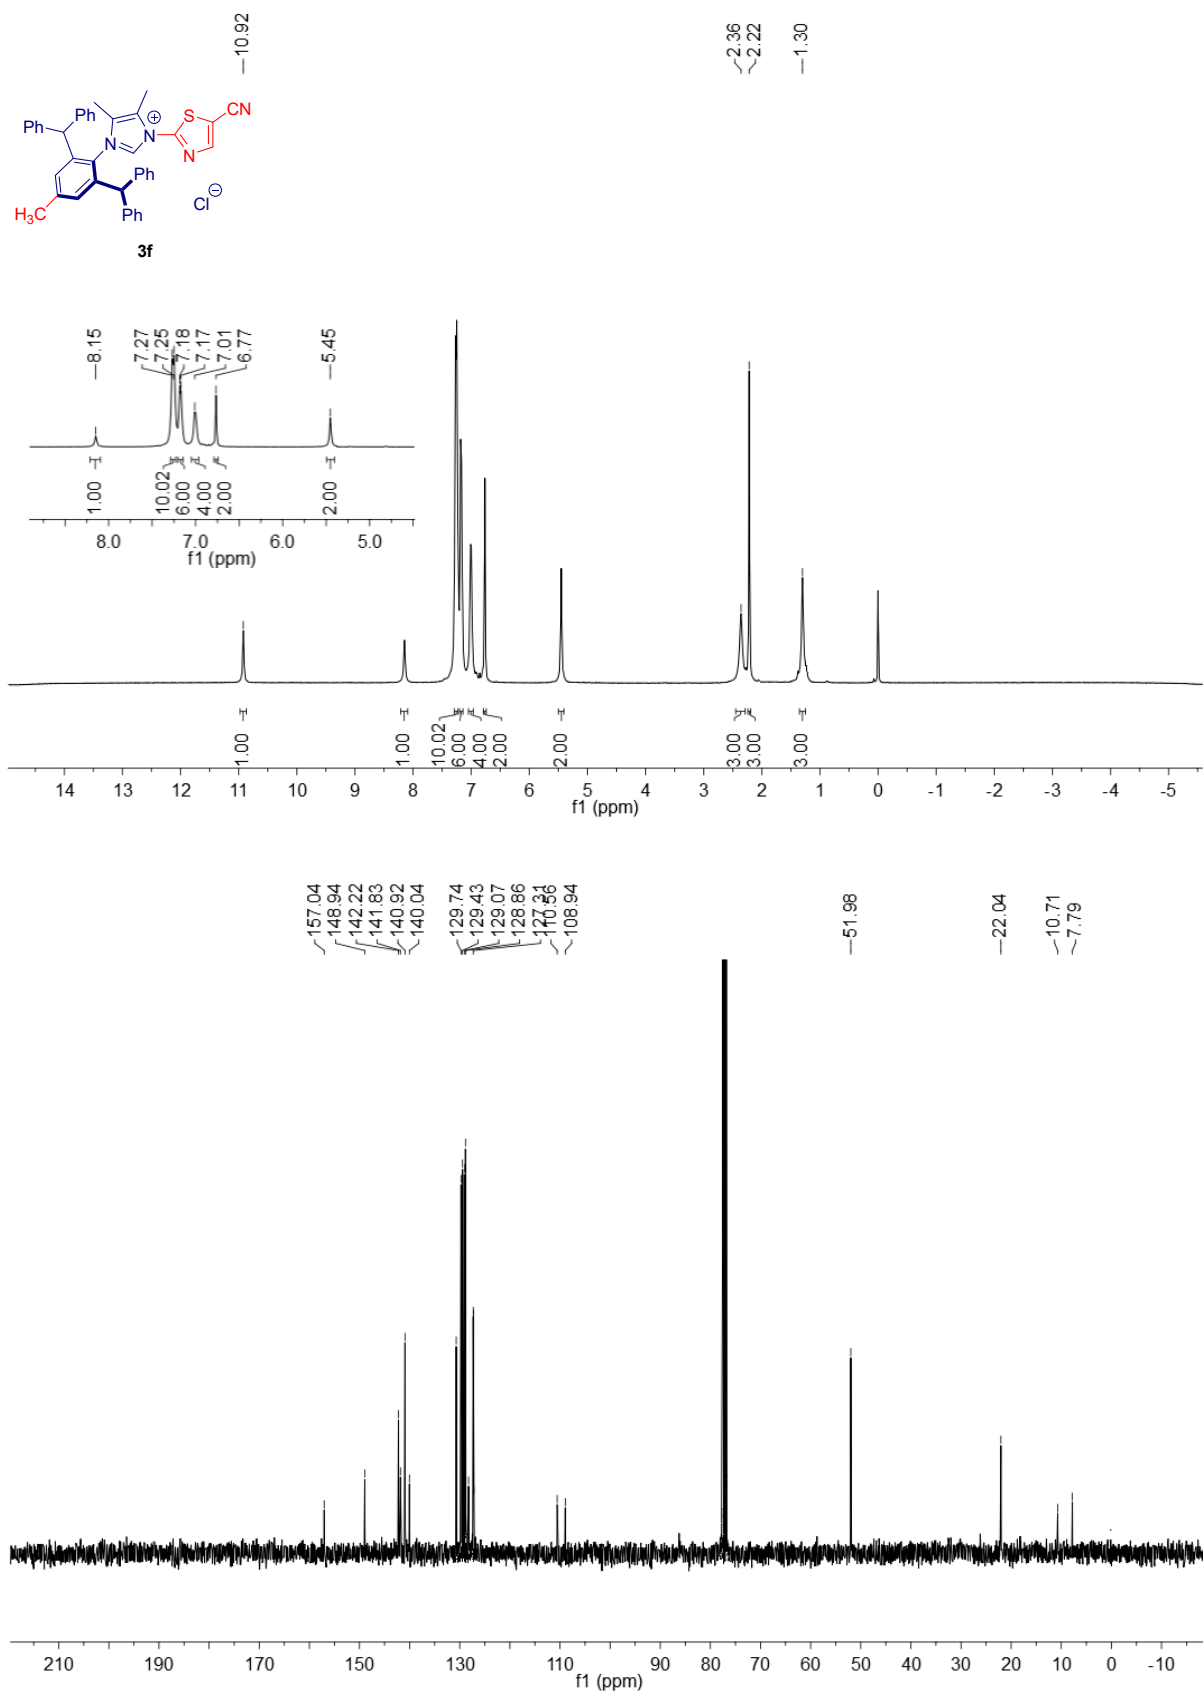



**4a** 1-(Benzo[d]thiazol-2-yl)-3-(2,6-dibenzhydryl-4-methylphenyl)-4,5-dimethylimidazol-2-ylidene)silver(I) chloride

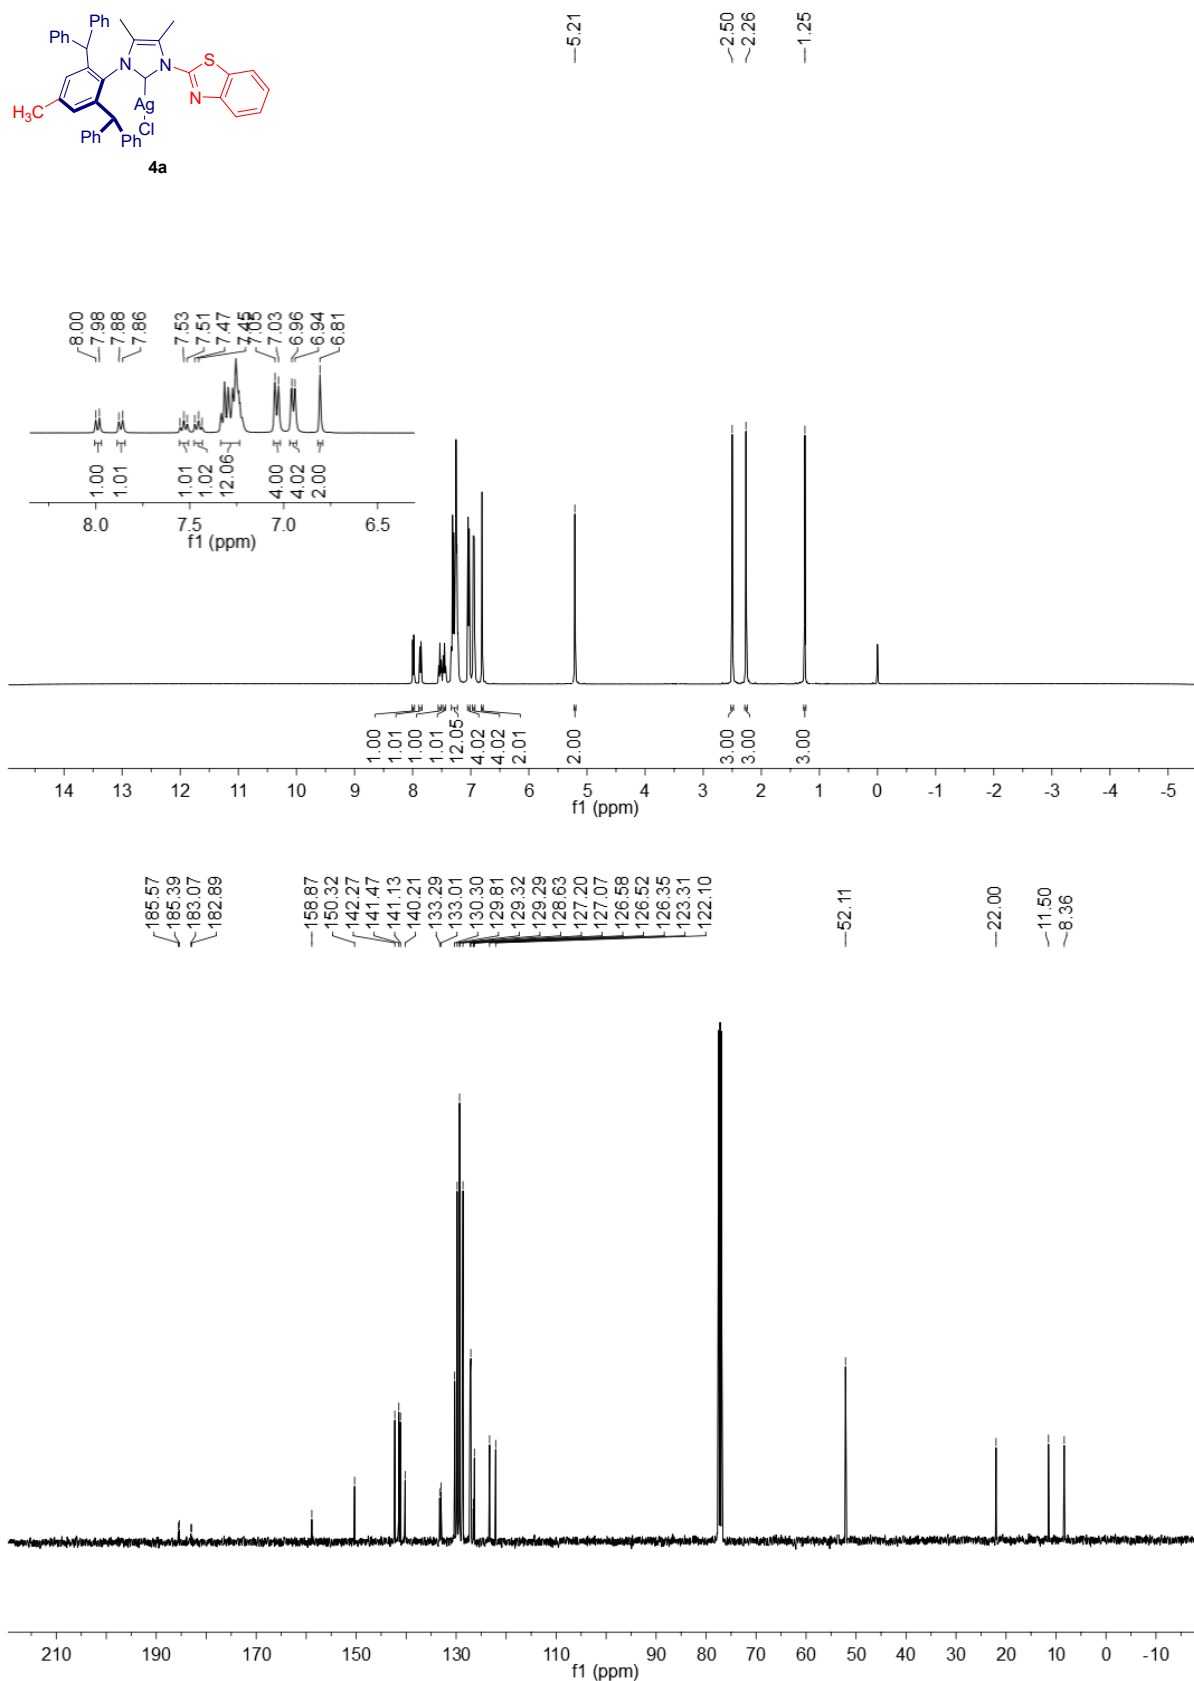

**4b** 1-(Benzo[d]thiazol-2-yl)-3-(2,6-dibenzhydryl-4-methoxyphenyl)-4,5-dimethylimidazol-2-ylidene)silver(I) chloride

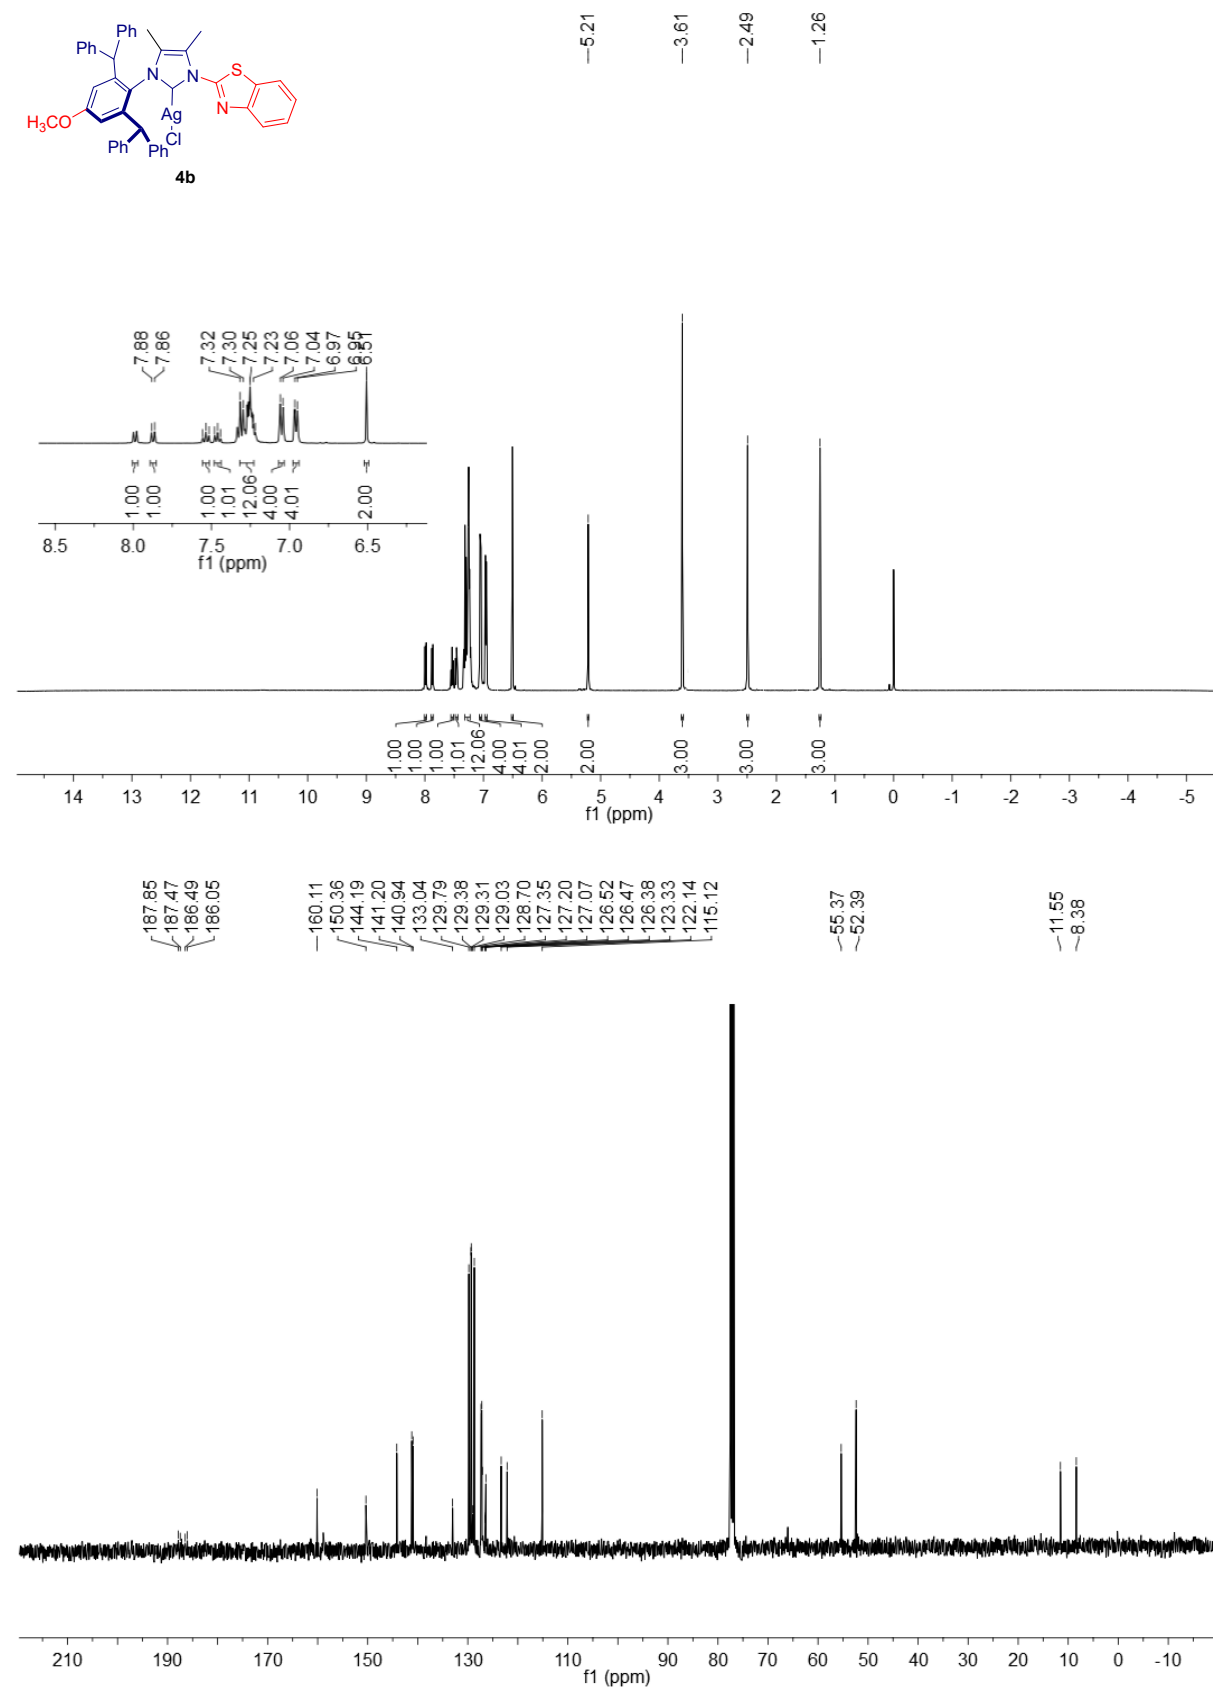

**5a** Dichloro(1-(benzo[d]thiazol-2-yl)-3-(2,6-dibenzhydryl-4-methylphenyl)-4,5-dimethylimidazol-2-ylidene)palladium(II)

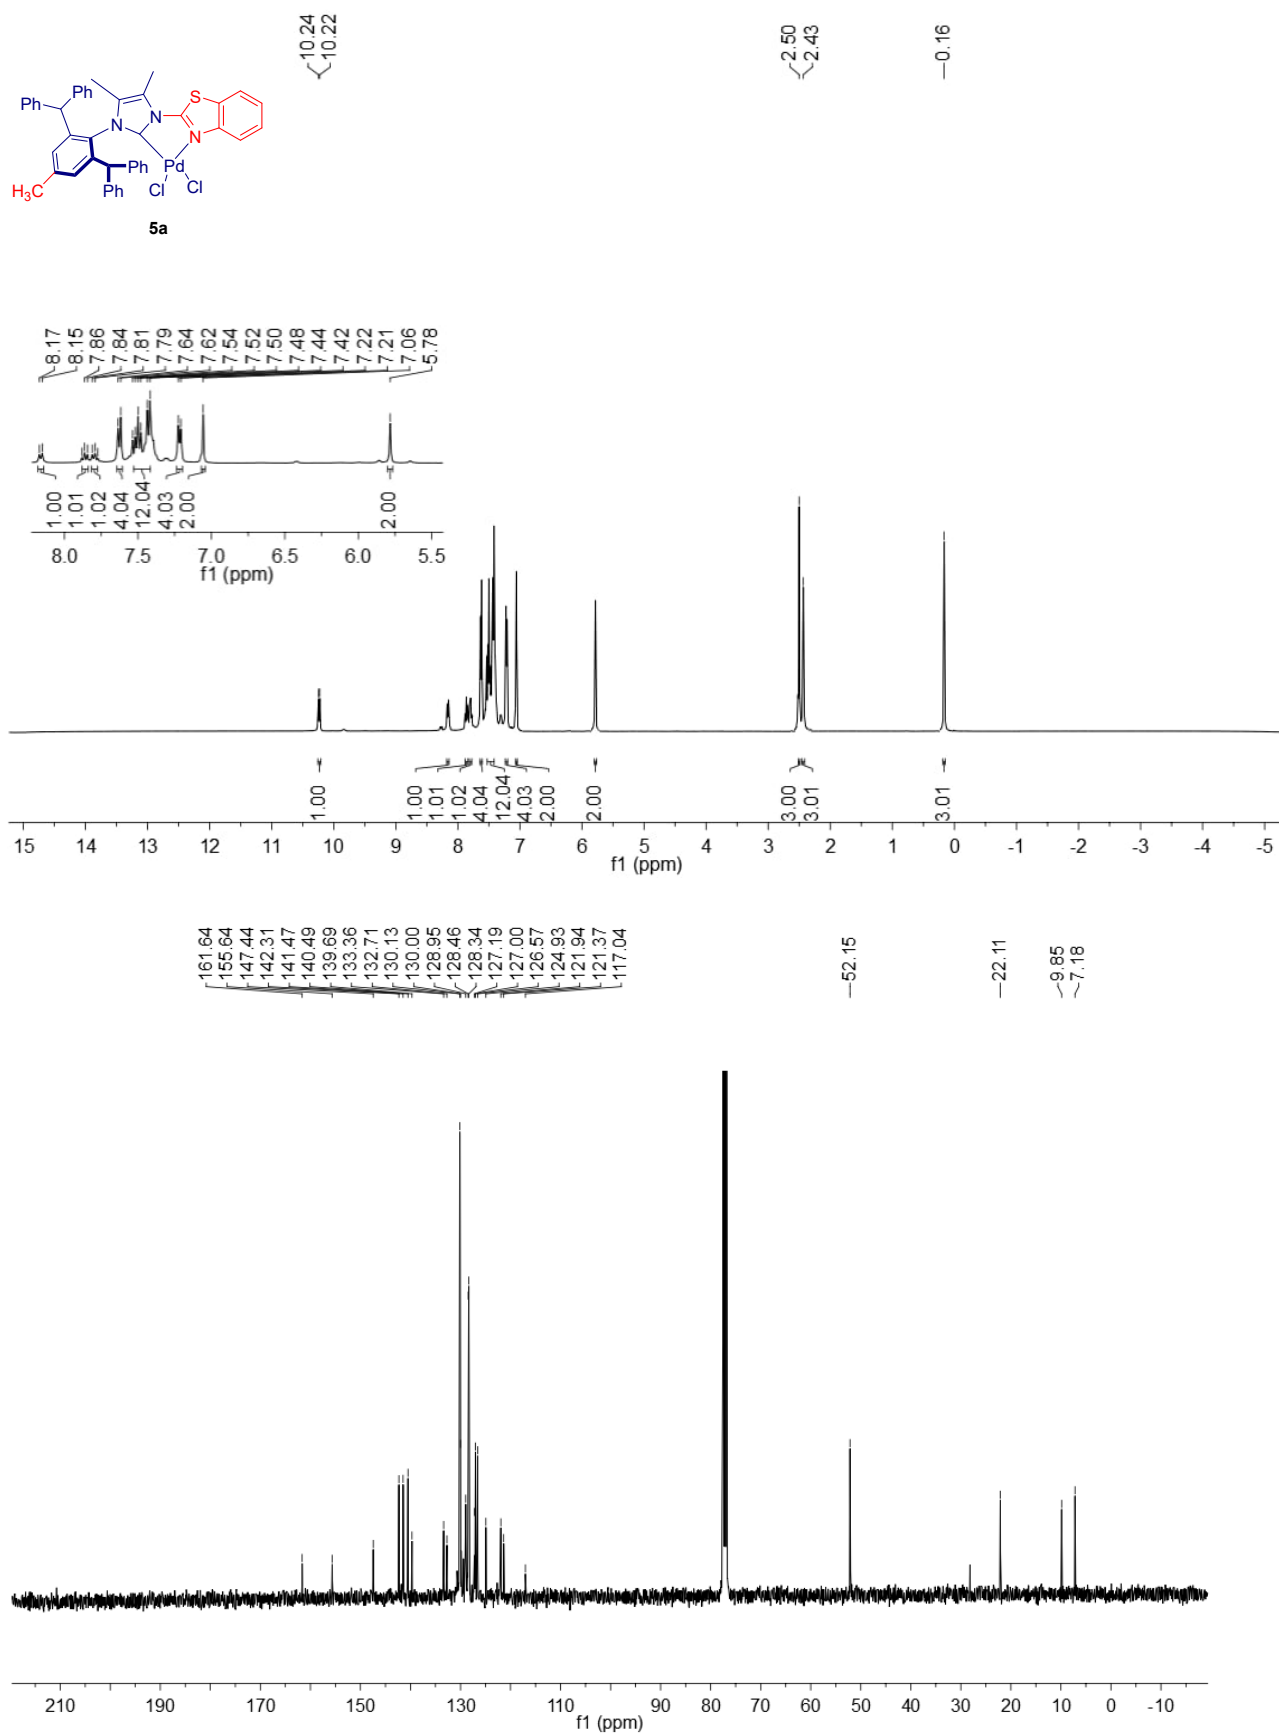

**5b** Dichloro(1-(benzo[*d*]thiazol-2-yl)-3-(2,6-dibenzhydryl-4-methoxyphenyl)-4,5-dimethylimidazol-2-ylidene)palladium(II)

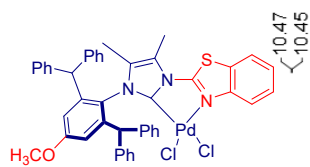

**5b**

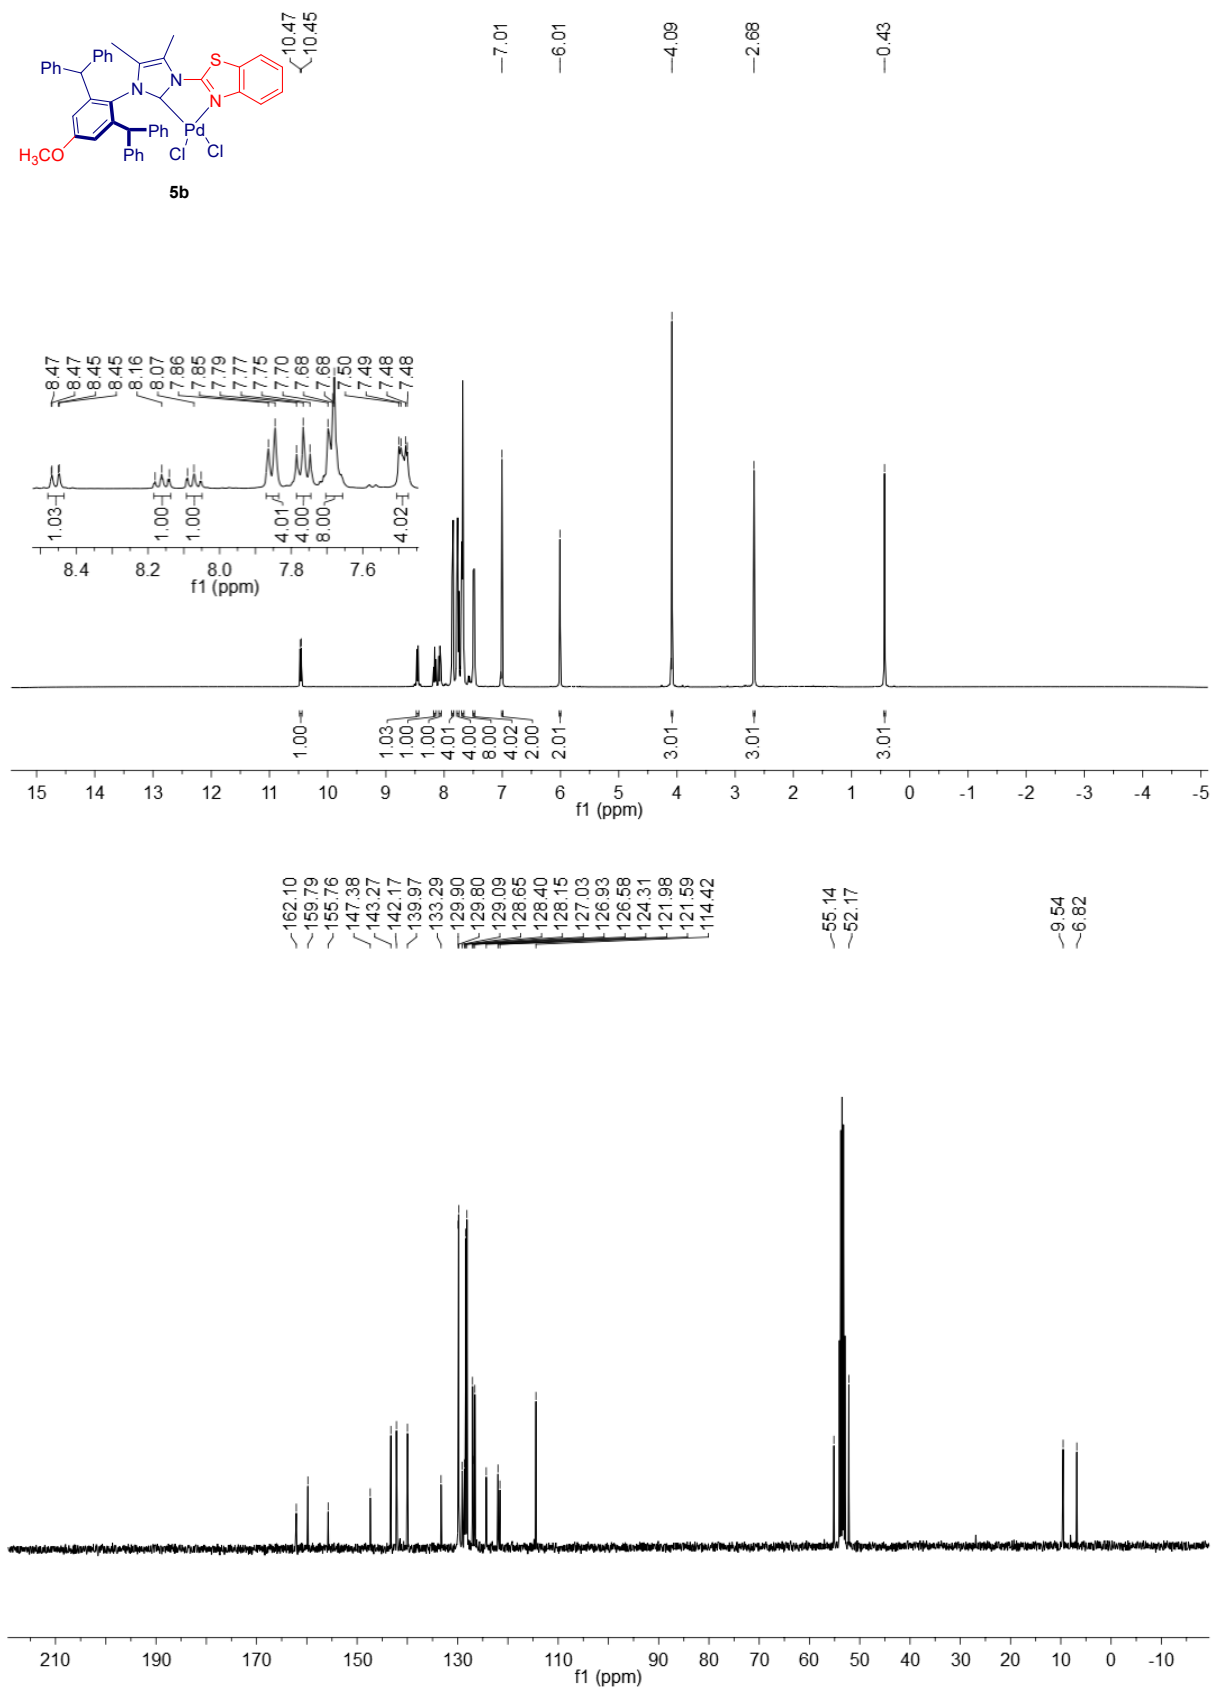

**6a** (1-(Benzo[*d*]thiazol-2-yl)-3-(2,6-dibenzhydryl-4-methylphenyl)-4,5-dimethylimidazol-2-ylidene)selenone

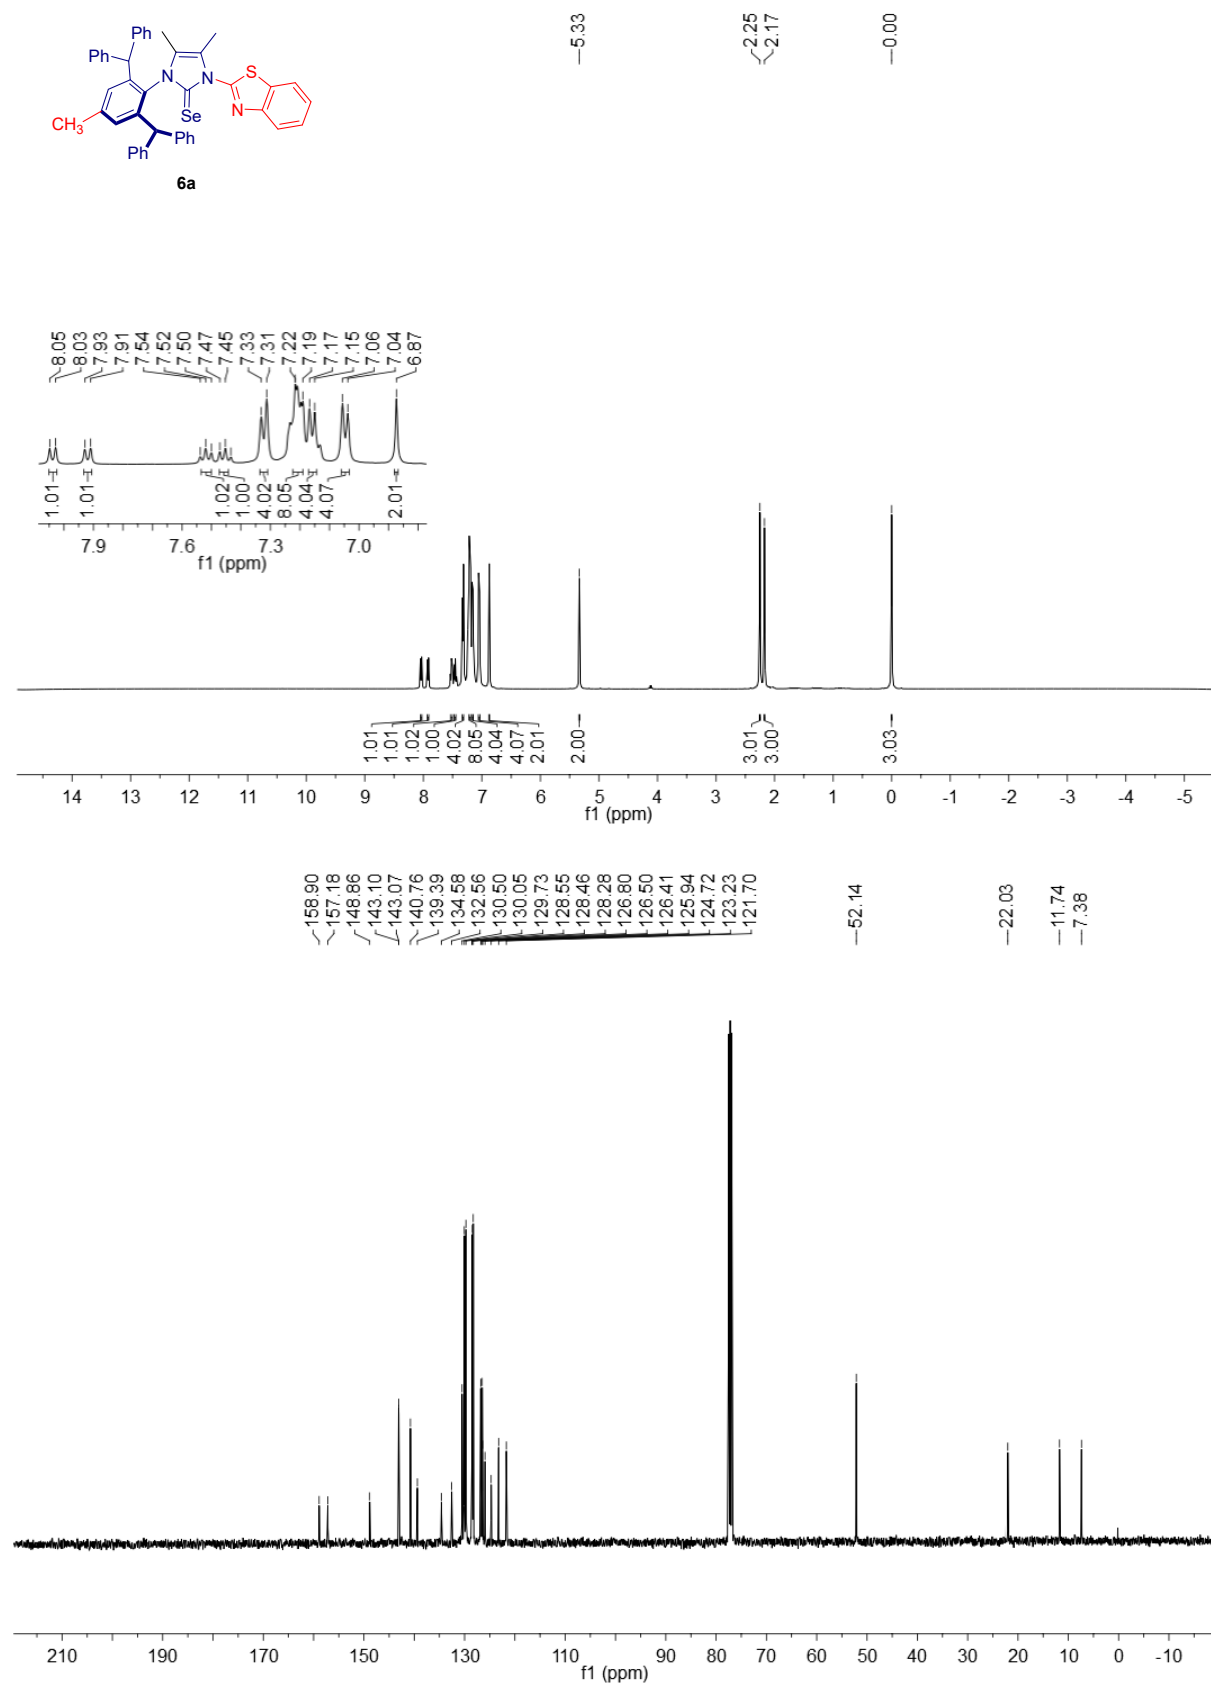

**6a** (1-(Benzo[d]thiazol-2-yl)-3-(2,6-dibenzhydryl-4-methylphenyl)-4,5-dimethylimidazol-2-ylidene)selenone,  $^{77}\text{Se}$  NMR

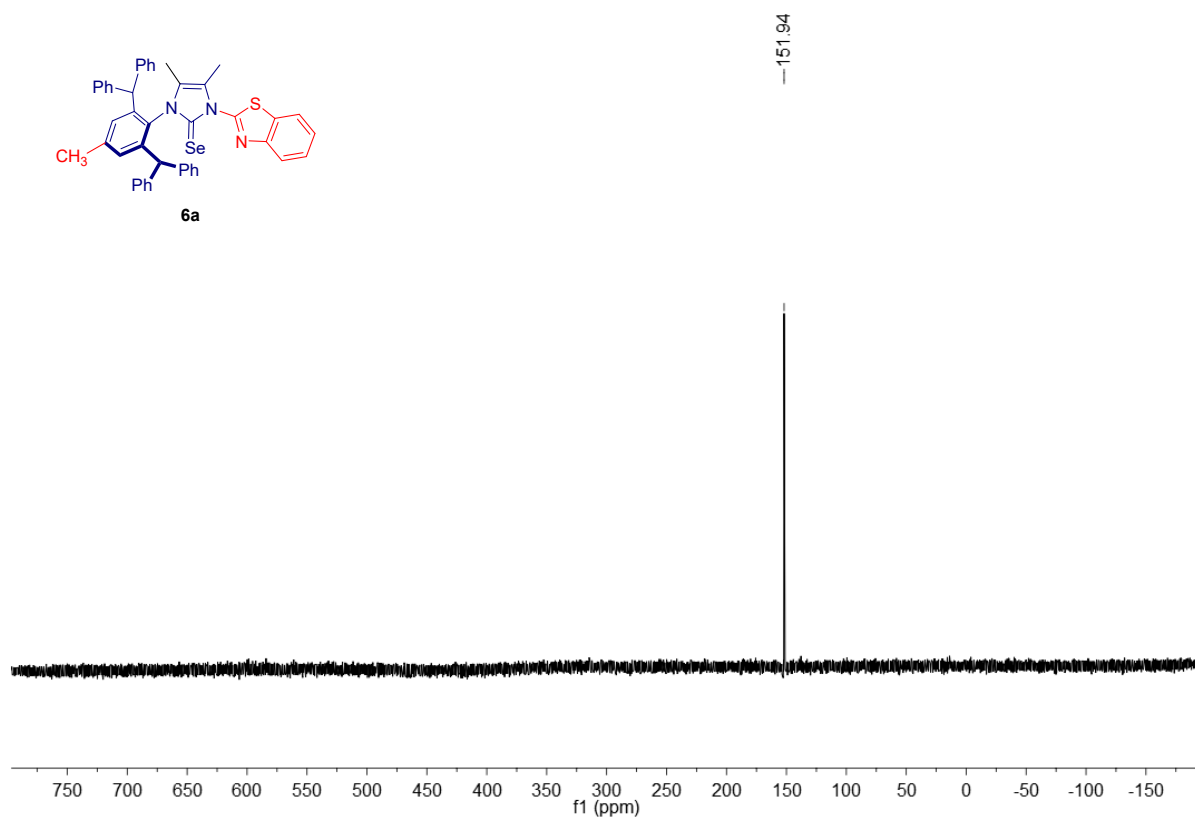

**6b** (1-(Benzo[d]thiazol-2-yl)-3-(2,6-dibenzhydryl-4-methoxyphenyl)-4,5-dimethylimidazol-2-ylidene)selenone

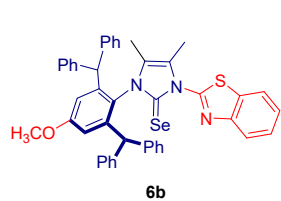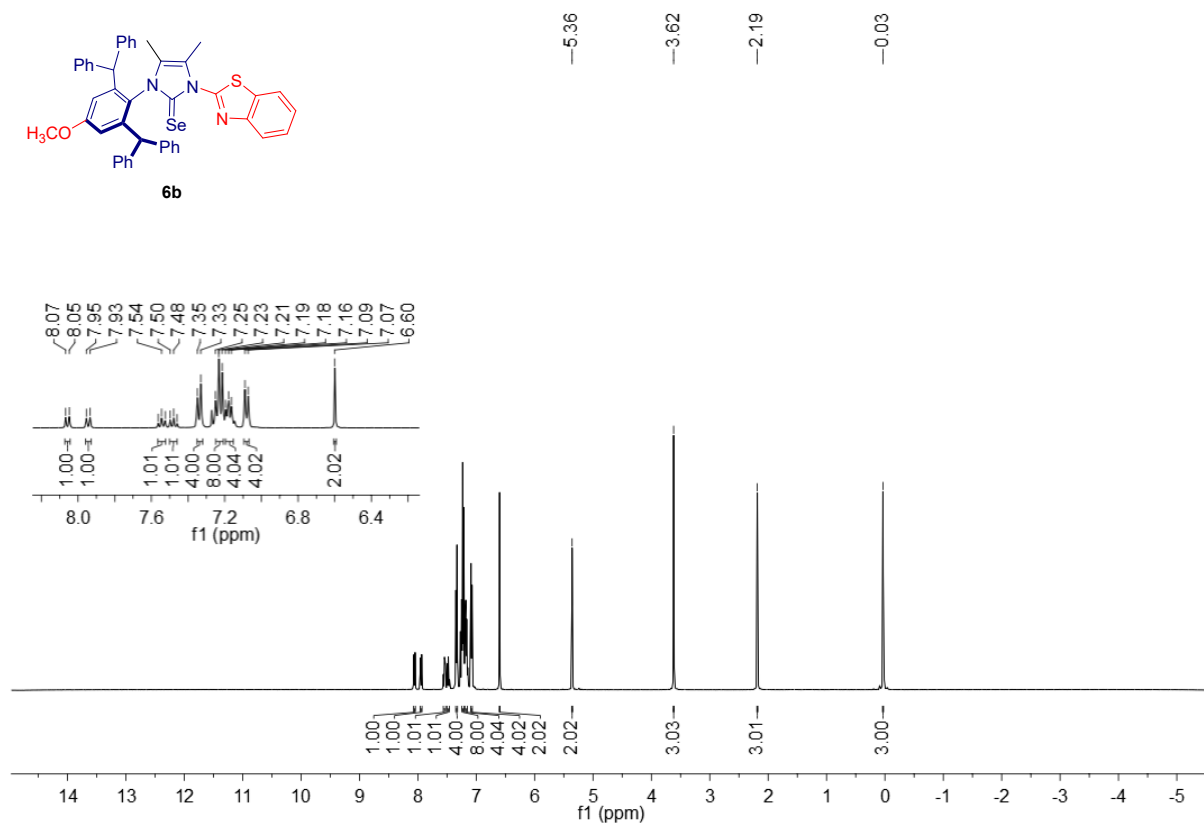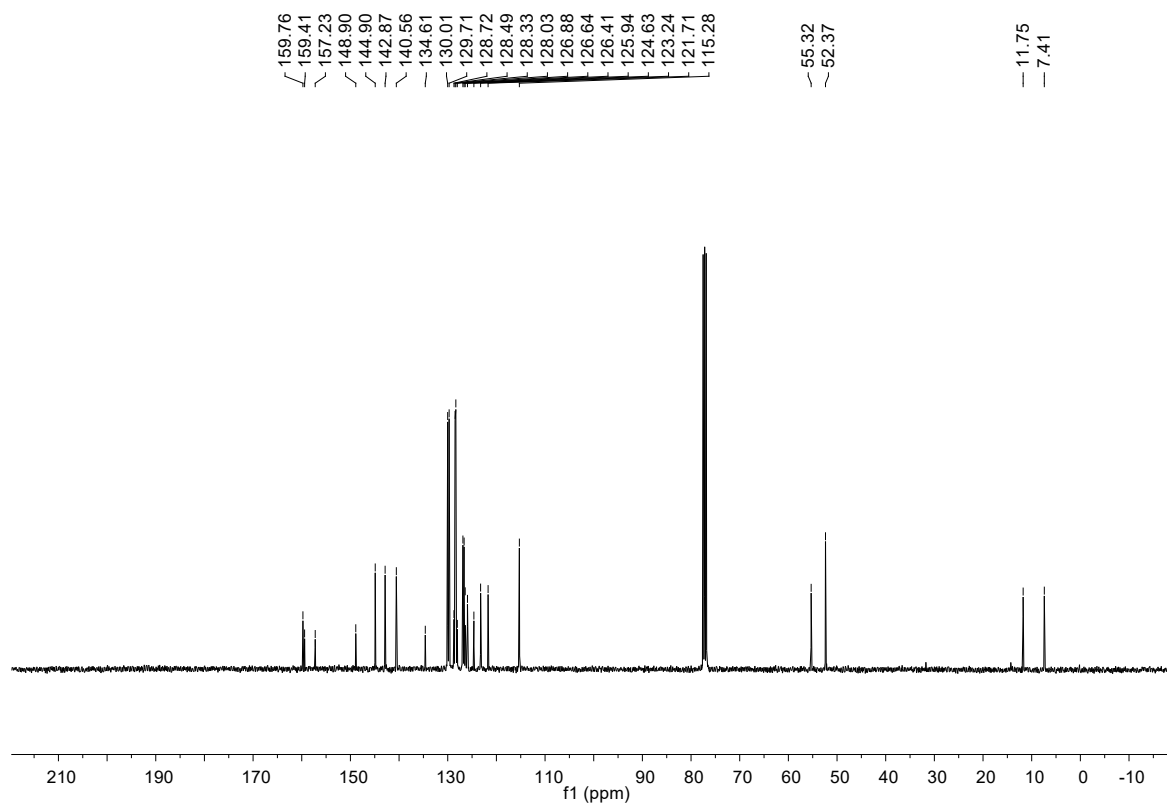

**6b** (1-(Benzo[*d*]thiazol-2-yl)-3-(2,6-dibenzhydryl-4-methoxyphenyl)-4,5-dimethylimidazol-2-ylidene)selenone, <sup>77</sup>Se NMR

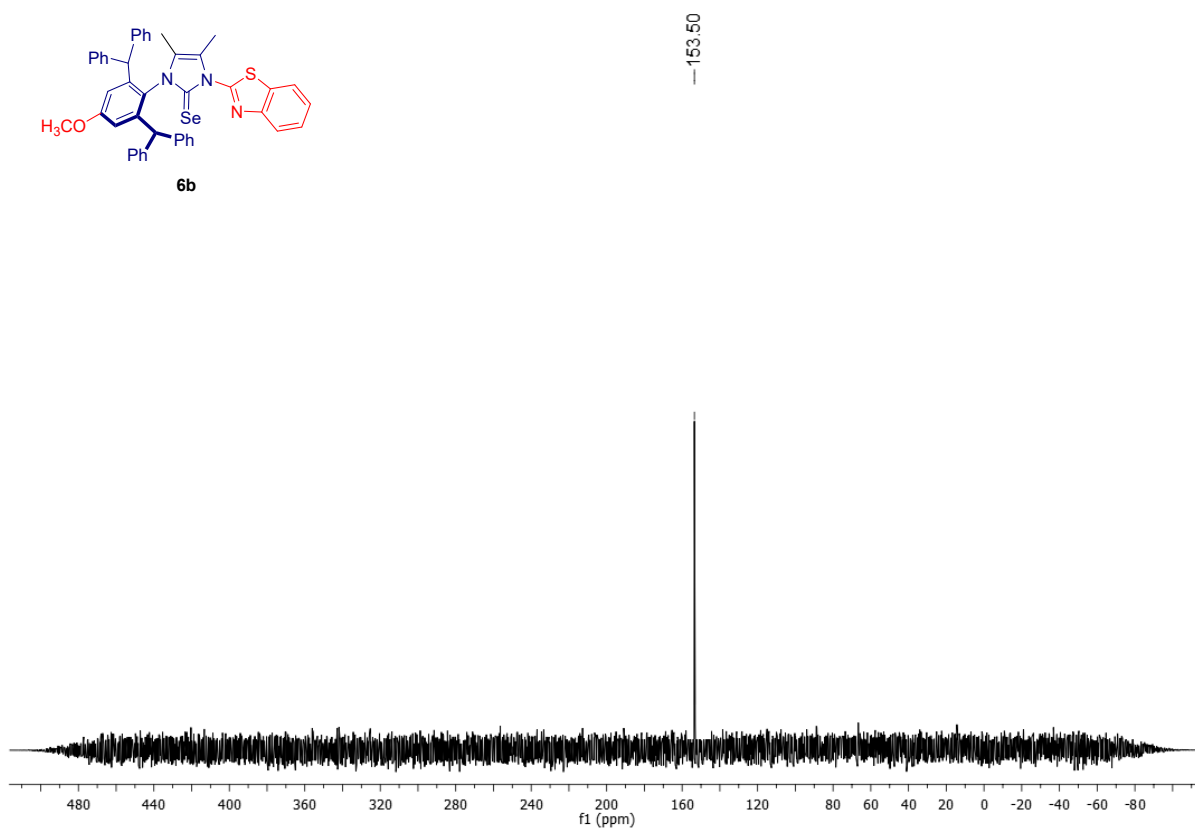



**7a** Chlorocarbonyl(1-(benzo[*d*]thiazol-2-yl)-3-(2,6-dibenzhydryl-4-methylphenyl)-4,5-dimethylimidazol-2-ylidene)rhodium(I)

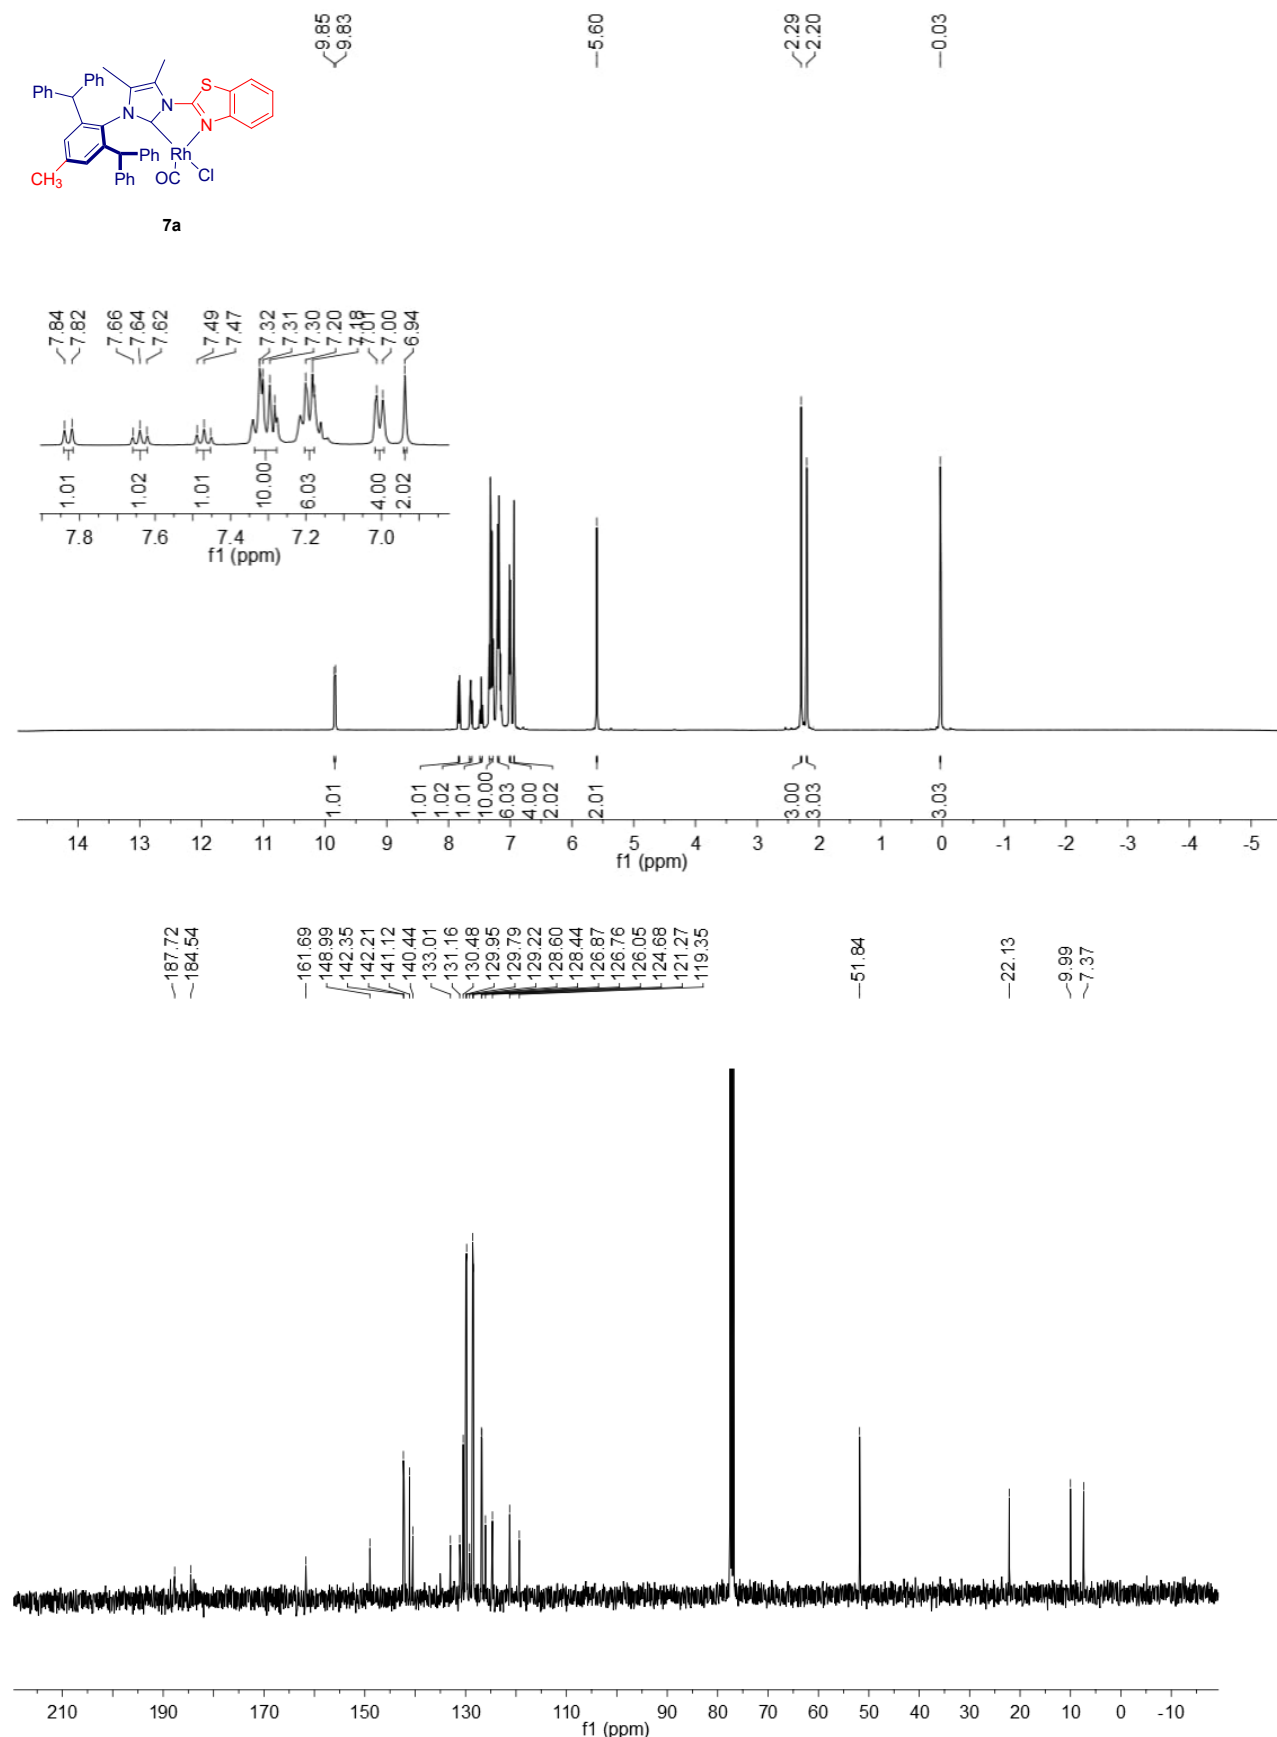

**Ag(I)–NHC-catalyzed three component coupling: 1-(1-Cyclohexyl-3-phenylprop-2-yn-1-yl)piperidine**

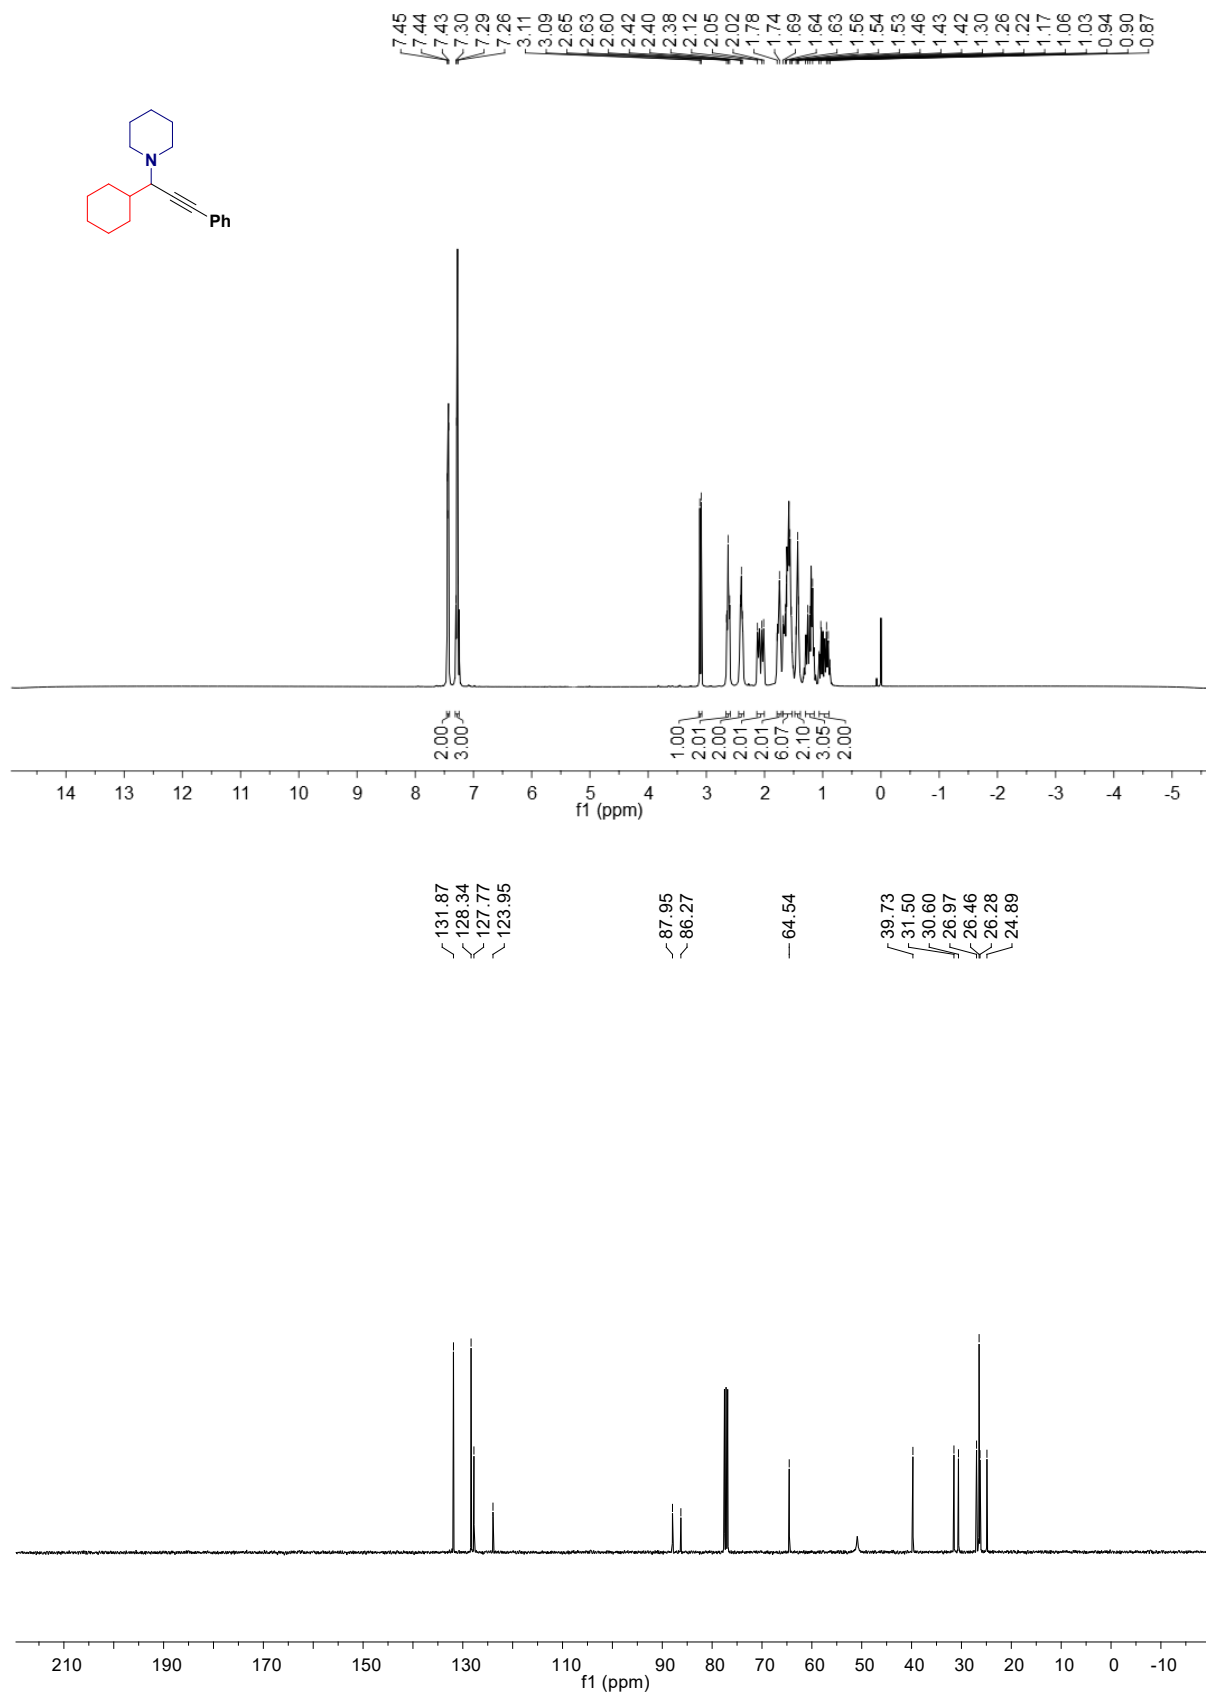

**Pd-NHC-catalyzed Heck coupling reaction: (*E*)-1-(4-Styrylphenyl)ethanone**

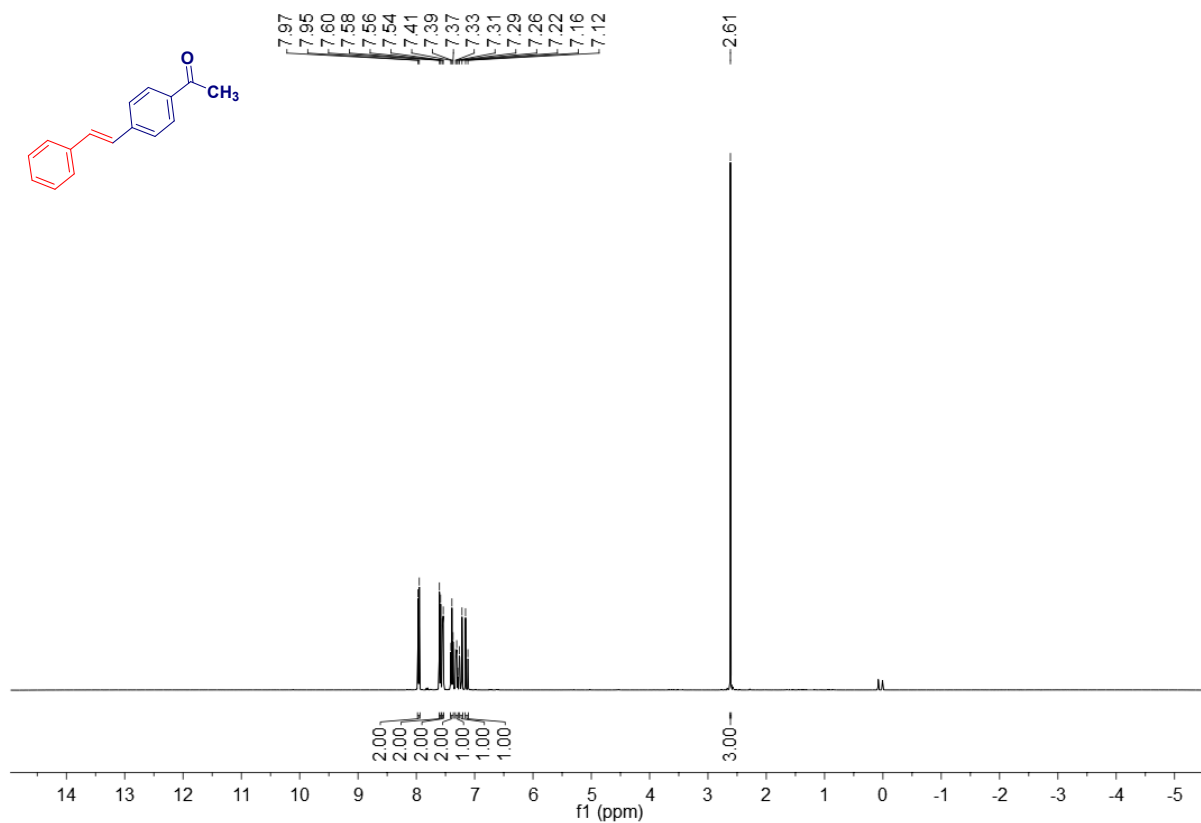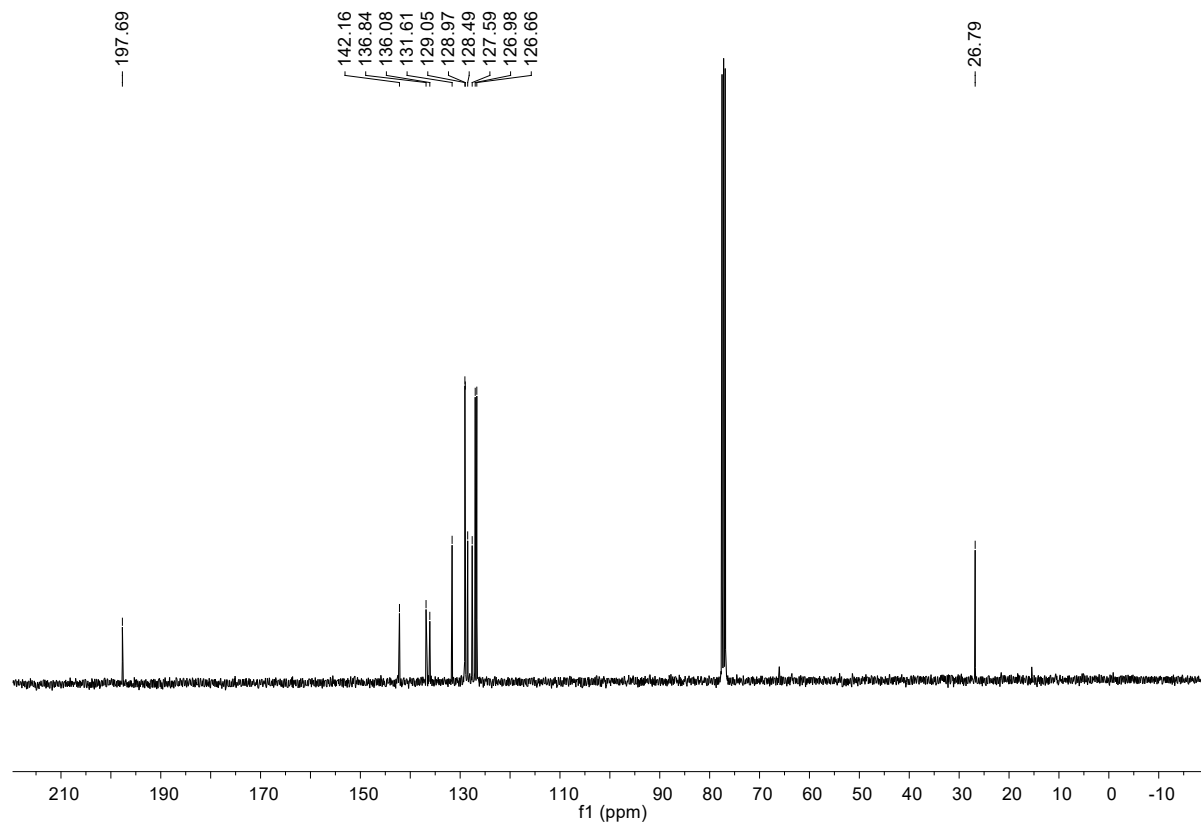

**Pd-NHC-catalyzed Heck coupling reaction: (*E*)-1-Methoxy-4-styrylbenzene**

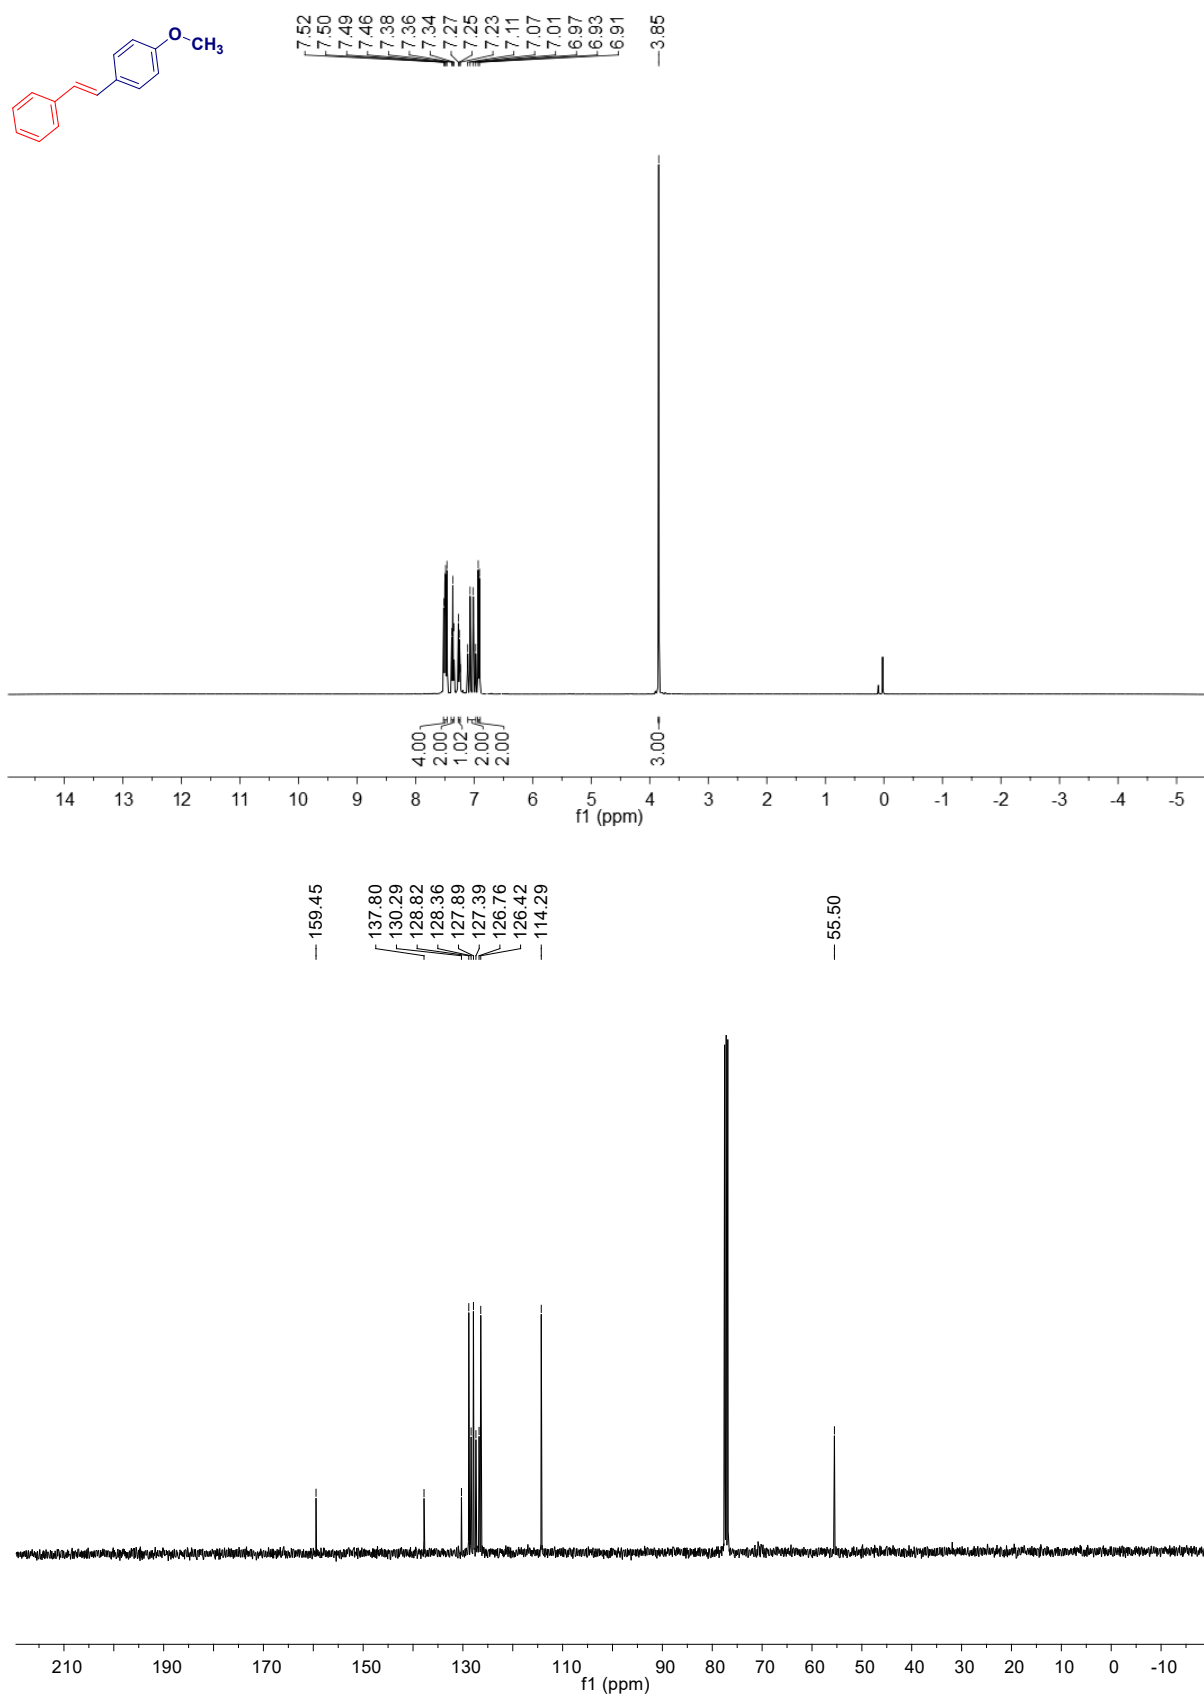

**IPr\*Thia**

Energy: -2299.998373 au

Sum of electronic and thermal Energies: -2299.262336 au

Geometry:

|   |             |             |             |
|---|-------------|-------------|-------------|
| N | -0.00112800 | 0.00000100  | 0.51322900  |
| N | 2.11254000  | 0.00000800  | 0.76080100  |
| C | 1.13992000  | 0.00000200  | -0.21442900 |
| C | 0.22971300  | 0.00000300  | 1.90947900  |
| C | 1.57752100  | 0.00000800  | 2.07447100  |
| C | -0.86879700 | 0.00000300  | 2.91716200  |
| H | -1.50343200 | -0.88398200 | 2.81630000  |
| H | -1.50343900 | 0.88398200  | 2.81629100  |
| H | -0.45302800 | 0.00000900  | 3.92505500  |
| C | 2.38260900  | 0.00001200  | 3.33024300  |
| H | 3.03140200  | -0.87593300 | 3.39369200  |
| H | 1.71139500  | 0.00001300  | 4.19031800  |
| H | 3.03140000  | 0.87595900  | 3.39368700  |
| C | -1.29747300 | -0.00000400 | -0.11910200 |
| C | -1.89999100 | 1.22535400  | -0.45555800 |
| C | -3.13462200 | 1.19665300  | -1.10746900 |
| H | -3.58789400 | 2.13463600  | -1.40880000 |
| C | -3.77497700 | -0.00001500 | -1.42776500 |
| C | -3.13461100 | -1.19667700 | -1.10747000 |
| H | -3.58787500 | -2.13466500 | -1.40880200 |
| C | -1.89998100 | -1.22536800 | -0.45555800 |
| C | -5.11877200 | -0.00002100 | -2.11590100 |

|   |             |             |             |
|---|-------------|-------------|-------------|
| H | -5.24330500 | 0.88480300  | -2.74416900 |
| H | -5.93450900 | -0.00001500 | -1.38432000 |
| H | -5.24330500 | -0.88485400 | -2.74415500 |
| C | -1.20888600 | 2.56105700  | -0.16577500 |
| H | -0.14794900 | 2.33856500  | -0.04212400 |
| C | -1.65367000 | 3.22194500  | 1.14130700  |
| C | -2.94070000 | 3.08960300  | 1.67100000  |
| H | -3.66951400 | 2.46612600  | 1.16732900  |
| C | -3.29954600 | 3.74086200  | 2.85261700  |
| H | -4.30356800 | 3.62282100  | 3.24562400  |
| C | -2.37508900 | 4.53354000  | 3.52759500  |
| H | -2.65267100 | 5.03635700  | 4.44717900  |
| C | -1.08617900 | 4.67024700  | 3.01191500  |
| H | -0.35464600 | 5.28068800  | 3.52996000  |
| C | -0.73330000 | 4.02089800  | 1.83228300  |
| H | 0.27151300  | 4.13511400  | 1.43820200  |
| C | -1.28612100 | 3.50390300  | -1.37432400 |
| C | -0.47265600 | 3.23117000  | -2.48252700 |
| H | 0.19316700  | 2.37424800  | -2.45427500 |
| C | -0.51199900 | 4.04190300  | -3.61271800 |
| H | 0.12841000  | 3.81653500  | -4.45849100 |
| C | -1.36835800 | 5.14298300  | -3.65712000 |
| H | -1.39885700 | 5.77655000  | -4.53653800 |
| C | -2.17666100 | 5.42545200  | -2.55972200 |
| H | -2.84011000 | 6.28331600  | -2.57949400 |
| C | -2.13311600 | 4.61335500  | -1.42461100 |

|   |             |             |             |
|---|-------------|-------------|-------------|
| H | -2.75589700 | 4.85646400  | -0.57169800 |
| C | -1.20886300 | -2.56106500 | -0.16577700 |
| H | -0.14792700 | -2.33856500 | -0.04213400 |
| C | -1.28610100 | -3.50391500 | -1.37432300 |
| C | -0.47265500 | -3.23117100 | -2.48253700 |
| H | 0.19315600  | -2.37423900 | -2.45429600 |
| C | -0.51200000 | -4.04190800 | -3.61272600 |
| H | 0.12839400  | -3.81653200 | -4.45850900 |
| C | -1.36834200 | -5.14300200 | -3.65711400 |
| H | -1.39884300 | -5.77657100 | -4.53653000 |
| C | -2.17662600 | -5.42548100 | -2.55970500 |
| H | -2.84006200 | -6.28335500 | -2.57946600 |
| C | -2.13307900 | -4.61338000 | -1.42459600 |
| H | -2.75584500 | -4.85649700 | -0.57167500 |
| C | -1.65363400 | -3.22195200 | 1.14131000  |
| C | -2.94066500 | -3.08962400 | 1.67100500  |
| H | -3.66948800 | -2.46615900 | 1.16733300  |
| C | -3.29950000 | -3.74088200 | 2.85262600  |
| H | -4.30352200 | -3.62285300 | 3.24563500  |
| C | -2.37503000 | -4.53354500 | 3.52760600  |
| H | -2.65260400 | -5.03636100 | 4.44719300  |
| C | -1.08612000 | -4.67023700 | 3.01192400  |
| H | -0.35457800 | -5.28066600 | 3.52997100  |
| C | -0.73325200 | -4.02088900 | 1.83228800  |
| H | 0.27156200  | -4.13509300 | 1.43820600  |
| N | 4.44995400  | 0.00001500  | 1.21351500  |

|   |            |            |             |
|---|------------|------------|-------------|
| C | 3.45848300 | 0.00001000 | 0.39209400  |
| C | 5.54063700 | 0.00001600 | -0.88357800 |
| C | 5.65505600 | 0.00001800 | 0.52366800  |
| C | 6.92191400 | 0.00002400 | 1.11646000  |
| H | 7.00564800 | 0.00002500 | 2.19667300  |
| C | 8.04651400 | 0.00002600 | 0.30054000  |
| H | 9.03354300 | 0.00003000 | 0.74847800  |
| C | 7.92214800 | 0.00002400 | -1.09630900 |
| H | 8.81241000 | 0.00002600 | -1.71465100 |
| C | 6.66883800 | 0.00001900 | -1.70211000 |
| H | 6.57722300 | 0.00001800 | -2.78187100 |
| S | 3.84076300 | 0.00000900 | -1.34191000 |
